# Supplementary material for: Genome and Transcriptome Sequencing of Populus × sibirica Identified Sex-Associated Allele-Specific Expression of the CLC Gene
Source: Frontiers journal article supplement (doi:10.3389/fgene.2021.676935), 2021-08-11
Supplement: Data_Sheet_2.PDF [file Data_Sheet_2.PDF]

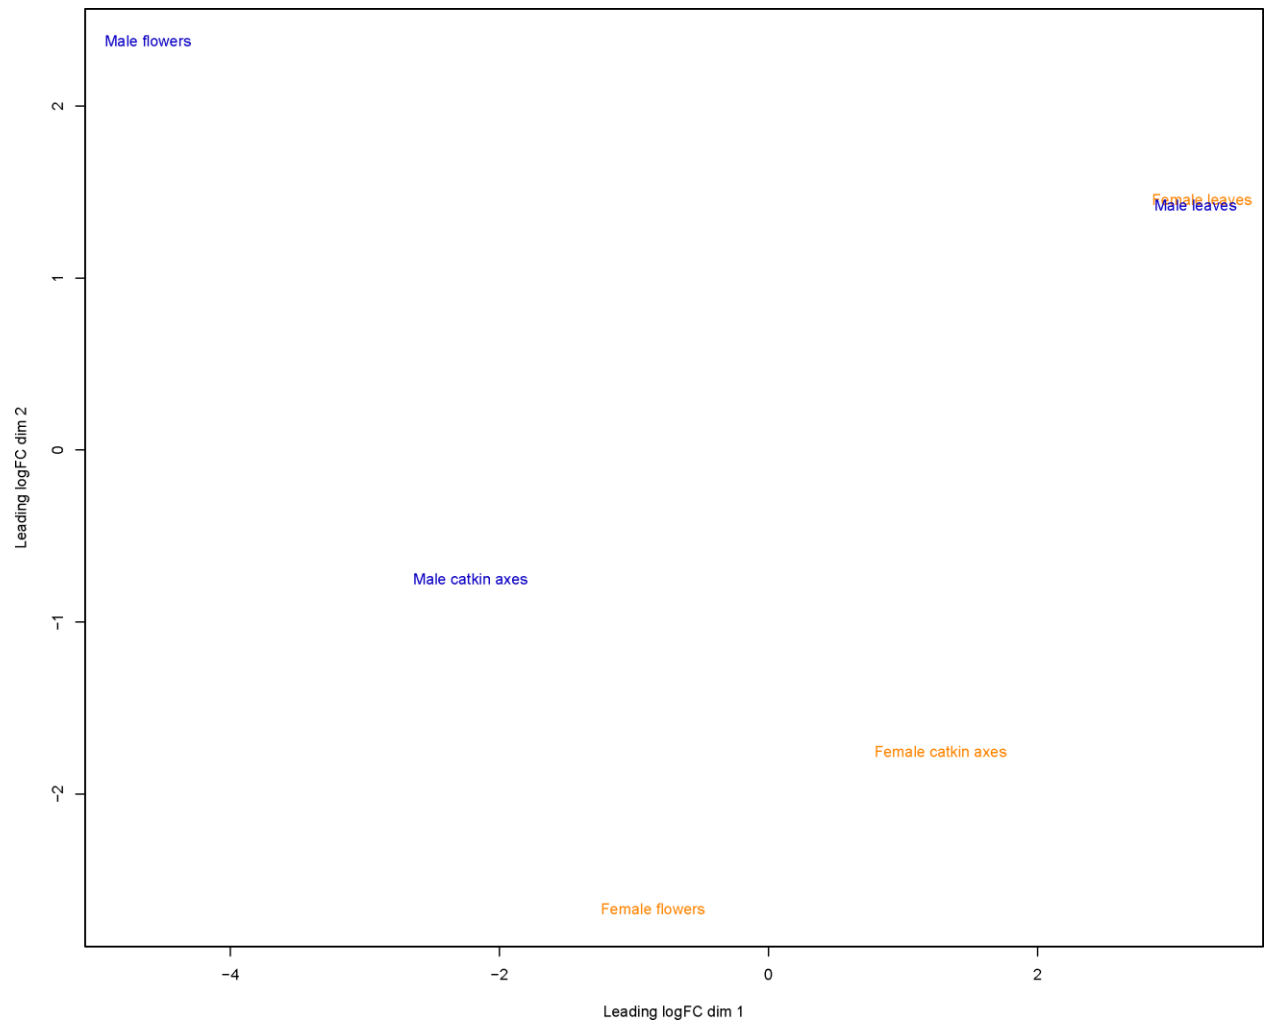

**Supplementary Data 2. Multidimensional scaling plot (dimensions 1 and 2) for gene expression profiles in leaves, catkin axes, and flowers of male and female *Populus x sibirica* plants. Male samples – blue, female samples – orange.**
