# Supplementary material for: Genome and Transcriptome Sequencing of Populus × sibirica Identified Sex-Associated Allele-Specific Expression of the CLC Gene
Source: Front Genet. 2021 Aug 11;12:676935. doi: 10.3389/fgene.2021.676935 (PMC8385651; doi:10.3389/fgene.2021.676935)
Supplement: Supplementary Data 4 — Polymorphisms in the SDR (including TCP, CLC, and MET1 genes) for male and female Populus × sibirica plants based on genome and transcriptome sequencing data. [file Data_Sheet_4.XLSX]

## Sheet: SNP table
Supplementary Data 4. Polymorphisms in the SDR (including TCP, CLC, and MET1 genes) for male and female Populus x sibirica plants based on genome and transcriptome sequencing data.
Symbol <*> in column “Alternative allele” means that, for this site, only the same nucleotide variant as in the reverence was identified.
					Female			Male			Male									Female
					Genome sequencing data			Genome sequencing data			Transcriptome sequencing data for catkin axes			Transcriptome sequencing data for flowers			Transcriptome sequencing data for leaves			Transcriptome sequencing data for catkin axes			Transcriptome sequencing data for flowers			Transcriptome sequencing data for leaves
Gene	Chromosome	Nucleotide position	Reference allele	Alternative allele	Alternative allele coverage	Reference allele coverage	Alternative allele frequency	Alternative allele coverage	Reference allele coverage	Alternative allele frequency	Alternative allele coverage	Reference allele coverage	Alternative allele frequency	Alternative allele coverage	Reference allele coverage	Alternative allele frequency	Alternative allele coverage	Reference allele coverage	Alternative allele frequency	Alternative allele coverage	Reference allele coverage	Alternative allele frequency	Alternative allele coverage	Reference allele coverage	Alternative allele frequency	Alternative allele coverage	Reference allele coverage	Alternative allele frequency
	18	16200044	G	<*>	0	29	0	0	13	0	0	0		0	0		0	0		0	0		0	0		0	0
	18	16200045	C	<*>	0	29	0	0	13	0	0	0		0	0		0	0		0	0		0	0		0	0
	18	16200046	A	<*>	0	29	0	0	13	0	0	0		0	0		0	0		0	0		0	0		0	0
	18	16200047	A	<*>	0	30	0	0	15	0	0	0		0	0		0	0		0	0		0	0		0	0
	18	16200048	C	<*>	0	30	0	0	15	0	0	0		0	0		0	0		0	0		0	0		0	0
	18	16200049	T	<*>	0	30	0	0	15	0	0	0		0	0		0	0		0	0		0	0		0	0
	18	16200050	G	<*>	0	30	0	0	16	0	0	0		0	0		0	0		0	0		0	0		0	0
	18	16200051	T	<*>	0	29	0	0	16	0	0	0		0	0		0	0		0	0		0	0		0	0
	18	16200052	A	G	13	16	0.448276	16	0	1	0	0		0	0		0	0		0	0		0	0		0	0
	18	16200053	A	<*>	0	28	0	0	15	0	0	0		0	0		0	0		0	0		0	0		0	0
	18	16200054	C	<*>	0	29	0	0	15	0	0	0		0	0		0	0		0	0		0	0		0	0
	18	16200055	A	<*>	0	29	0	0	15	0	0	0		0	0		0	0		0	0		0	0		0	0
	18	16200056	T	<*>	0	29	0	0	15	0	0	0		0	0		0	0		0	0		0	0		0	0
	18	16200057	G	<*>	0	29	0	0	15	0	0	0		0	0		0	0		0	0		0	0		0	0
	18	16200058	C	<*>	0	29	0	0	15	0	0	0		0	0		0	0		0	0		0	0		0	0
	18	16200059	A	<*>	0	29	0	0	15	0	0	0		0	0		0	0		0	0		0	0		0	0
	18	16200060	G	<*>	0	28	0	0	15	0	0	0		0	0		0	0		0	0		0	0		0	0
	18	16200061	A	<*>	0	28	0	0	15	0	0	0		0	0		0	0		0	0		0	0		0	0
	18	16200062	A	<*>	0	28	0	0	15	0	0	0		0	0		0	0		0	0		0	0		0	0
	18	16200063	T	<*>	0	28	0	0	15	0	0	0		0	0		0	0		0	0		0	0		0	0
	18	16200064	T	<*>	0	28	0	0	15	0	0	0		0	0		0	0		0	0		0	0		0	0
	18	16200065	T	<*>	0	29	0	0	16	0	0	0		0	0		0	0		0	0		0	0		0	0
	18	16200066	A	<*>	0	29	0	0	15	0	0	0		0	0		0	0		0	0		0	0		0	0
	18	16200067	A	<*>	0	29	0	0	15	0	0	0		0	0		0	0		0	0		0	0		0	0
	18	16200068	A	<*>	0	30	0	0	15	0	0	0		0	0		0	0		0	0		0	0		0	0
	18	16200069	A	<*>	0	30	0	0	15	0	0	0		0	0		0	0		0	0		0	0		0	0
	18	16200070	A	<*>	0	30	0	0	15	0	0	0		0	0		0	0		0	0		0	0		0	0
	18	16200071	T	<*>	0	29	0	0	15	0	0	0		0	0		0	0		0	0		0	0		0	0
	18	16200072	G	<*>	0	30	0	0	15	0	0	0		0	0		0	0		0	0		0	0		0	0
	18	16200073	A	<*>	0	29	0	0	15	0	0	0		0	0		0	0		0	0		0	0		0	0
	18	16200074	G	<*>	0	28	0	0	15	0	0	0		0	0		0	0		0	0		0	0		0	0
	18	16200075	A	<*>	0	28	0	0	15	0	0	0		0	0		0	0		0	0		0	0		0	0
	18	16200076	A	<*>	0	27	0	0	14	0	0	0		0	0		0	0		0	0		0	0		0	0
	18	16200077	G	<*>	0	27	0	0	14	0	0	0		0	0		0	0		0	0		0	0		0	0
	18	16200078	A	<*>	0	27	0	0	15	0	0	0		0	0		0	0		0	0		0	0		0	0
	18	16200079	T	<*>	0	27	0	0	15	0	0	0		0	0		0	0		0	0		0	0		0	0
	18	16200080	G	<*>	0	27	0	0	15	0	0	0		0	0		0	0		0	0		0	0		0	0
	18	16200081	A	<*>	0	27	0	0	15	0	0	0		0	0		0	0		0	0		0	0		0	0
	18	16200082	G	<*>	0	27	0	0	15	0	0	0		0	0		0	0		0	0		0	0		0	0
	18	16200083	A	<*>	0	26	0	0	15	0	0	0		0	0		0	0		0	0		0	0		0	0
	18	16200084	A	<*>	0	25	0	0	15	0	0	0		0	0		0	0		0	0		0	0		0	0
	18	16200085	A	<*>	0	25	0	0	15	0	0	0		0	0		0	0		0	0		0	0		0	0
	18	16200086	A	<*>	0	25	0	0	15	0	0	0		0	0		0	0		0	0		0	0		0	0
	18	16200087	C	T	0	25	0	7	8	0.466667	0	0		0	0		0	0		0	0		0	0		0	0
	18	16200088	G	<*>	0	25	0	0	16	0	0	0		0	0		0	0		0	0		0	0		0	0
	18	16200089	A	<*>	0	26	0	0	15	0	0	0		0	0		0	0		0	0		0	0		0	0
	18	16200090	A	<*>	0	27	0	0	16	0	0	0		0	0		0	0		0	0		0	0		0	0
	18	16200091	T	<*>	0	28	0	0	16	0	0	0		0	0		0	0		0	0		0	0		0	0
	18	16200092	T	<*>	0	27	0	0	16	0	0	0		0	0		0	0		0	0		0	0		0	0
	18	16200093	T	<*>	0	27	0	0	17	0	0	0		0	0		0	0		0	0		0	0		0	0
	18	16200094	T	<*>	0	27	0	0	17	0	0	0		0	0		0	0		0	0		0	0		0	0
	18	16200095	G	<*>	0	27	0	0	16	0	0	0		0	0		0	0		0	0		0	0		0	0
	18	16200096	C	<*>	0	27	0	0	16	0	0	0		0	0		0	0		0	0		0	0		0	0
	18	16200097	C	<*>	0	27	0	0	16	0	0	0		0	0		0	0		0	0		0	0		0	0
	18	16200098	C	<*>	0	26	0	0	16	0	0	0		0	0		0	0		0	0		0	0		0	0
	18	16200099	A	<*>	0	25	0	0	16	0	0	0		0	0		0	0		0	0		0	0		0	0
	18	16200100	T	<*>	0	24	0	0	16	0	0	0		0	0		0	0		0	0		0	0		0	0
	18	16200101	T	<*>	0	23	0	0	15	0	0	0		0	0		0	0		0	0		0	0		0	0
	18	16200102	A	G	0	22	0	0	14	0	0	0		0	0		0	0		0	0		0	0		0	0
	18	16200103	T	<*>	0	22	0	0	14	0	0	0		0	0		0	0		0	0		0	0		0	0
	18	16200104	G	<*>	0	21	0	0	14	0	0	0		0	0		0	0		0	0		0	0		0	0
	18	16200105	T	<*>	0	21	0	0	14	0	0	0		0	0		0	0		0	0		0	0		0	0
	18	16200106	G	<*>	0	21	0	0	15	0	0	0		0	0		0	0		0	0		0	0		0	0
	18	16200107	C	<*>	0	21	0	0	15	0	0	0		0	0		0	0		0	0		0	0		0	0
	18	16200108	T	<*>	0	19	0	0	15	0	0	0		0	0		0	0		0	0		0	0		0	0
	18	16200109	A	<*>	0	19	0	0	15	0	0	0		0	0		0	0		0	0		0	0		0	0
	18	16200110	C	<*>	0	19	0	0	15	0	0	0		0	0		0	0		0	0		0	0		0	0
	18	16200111	A	<*>	0	20	0	0	15	0	0	0		0	0		0	0		0	0		0	0		0	0
	18	16200112	A	<*>	0	20	0	0	15	0	0	0		0	0		0	0		0	0		0	0		0	0
	18	16200113	C	<*>	0	20	0	0	15	0	0	0		0	0		0	0		0	0		0	0		0	0
	18	16200114	G	<*>	0	19	0	0	15	0	0	0		0	0		0	0		0	0		0	0		0	0
	18	16200115	G	<*>	0	19	0	0	15	0	0	0		0	0		0	0		0	0		0	0		0	0
	18	16200116	C	<*>	0	19	0	0	15	0	0	0		0	0		0	0		0	0		0	0		0	0
	18	16200117	A	<*>	0	19	0	0	15	0	0	0		0	0		0	0		0	0		0	0		0	0
	18	16200118	T	<*>	0	19	0	0	15	0	0	0		0	0		0	0		0	0		0	0		0	0
	18	16200119	G	<*>	0	19	0	0	15	0	0	0		0	0		0	0		0	0		0	0		0	1	0
	18	16200120	T	<*>	0	19	0	0	15	0	0	0		0	0		0	0		0	0		0	0		0	1	0
	18	16200121	G	<*>	0	19	0	0	15	0	0	0		0	0		0	0		0	0		0	0		0	1	0
	18	16200122	A	<*>	0	20	0	0	14	0	0	0		0	0		0	0		0	0		0	0		0	1	0
	18	16200123	G	<*>	0	22	0	0	15	0	0	0		0	0		0	0		0	0		0	0		0	1	0
	18	16200124	C	<*>	0	21	0	0	15	0	0	0		0	0		0	0		0	0		0	0		0	1	0
	18	16200125	A	<*>	0	21	0	0	15	0	0	0		0	0		0	0		0	0		0	0		0	1	0
	18	16200126	G	<*>	0	21	0	0	15	0	0	0		0	0		0	0		0	0		0	0		0	1	0
	18	16200127	C	<*>	0	22	0	0	15	0	0	0		0	0		0	0		0	0		0	0		0	1	0
	18	16200128	T	<*>	0	22	0	0	15	0	0	0		0	0		0	0		0	0		0	0		0	1	0
	18	16200129	A	<*>	0	23	0	0	15	0	0	0		0	0		0	0		0	0		0	0		0	1	0
	18	16200130	A	<*>	0	22	0	0	15	0	0	0		0	0		0	0		0	0		0	0		0	1	0
	18	16200131	A	<*>	0	22	0	0	15	0	0	0		0	0		0	0		0	0		0	0		0	1	0
	18	16200132	G	<*>	0	22	0	0	15	0	0	0		0	0		0	0		0	0		0	0		0	1	0
	18	16200133	A	<*>	0	22	0	0	14	0	0	0		0	0		0	0		0	0		0	0		0	1	0
	18	16200134	T	<*>	0	23	0	0	14	0	0	0		0	0		0	0		0	0		0	0		0	1	0
	18	16200135	A	<*>	0	23	0	0	14	0	0	0		0	0		0	0		0	0		0	0		0	1	0
	18	16200136	G	<*>	0	23	0	0	14	0	0	0		0	0		0	0		0	0		0	0		0	1	0
	18	16200137	A	<*>	0	23	0	0	14	0	0	0		0	0		0	0		0	0		0	0		0	1	0
	18	16200138	A	<*>	0	23	0	0	14	0	0	0		0	0		0	0		0	0		0	0		0	1	0
	18	16200139	G	<*>	0	23	0	0	14	0	0	0		0	0		0	0		0	0		0	0		0	1	0
	18	16200140	C	<*>	0	24	0	0	14	0	0	0		0	0		0	0		0	0		0	0		0	1	0
	18	16200141	A	<*>	0	24	0	0	14	0	0	0		0	0		0	0		0	0		0	0		0	1	0
	18	16200142	A	<*>	0	25	0	0	14	0	0	0		0	0		0	0		0	0		0	0		0	1	0
	18	16200143	G	<*>	0	25	0	0	14	0	0	0		0	0		0	0		0	0		0	0		0	1	0
	18	16200144	A	<*>	0	26	0	0	14	0	0	0		0	0		0	0		0	0		0	0		0	1	0
	18	16200145	A	<*>	0	25	0	0	14	0	0	0		0	0		0	0		0	0		0	0		0	1	0
	18	16200146	T	<*>	0	25	0	0	14	0	0	0		0	0		0	0		0	0		0	0		0	1	0
	18	16200147	G	<*>	0	25	0	0	14	0	0	0		0	0		0	0		0	0		0	0		0	1	0
	18	16200148	T	<*>	0	25	0	0	14	0	0	0		0	0		0	0		0	0		0	0		0	1	0
	18	16200149	G	C	13	13	0.5	0	13	0	0	0		0	0		0	0		0	0		0	0		0	1	0
	18	16200150	C	<*>	0	26	0	0	13	0	0	0		0	0		0	0		0	0		0	0		0	1	0
	18	16200151	A	<*>	0	26	0	0	13	0	0	0		0	0		0	0		0	0		0	0		0	1	0
	18	16200152	C	<*>	0	26	0	0	13	0	0	0		0	0		0	0		0	0		0	0		0	1	0
	18	16200153	A	<*>	0	26	0	0	13	0	0	0		0	0		0	0		0	0		0	0		0	1	0
	18	16200154	C	<*>	0	26	0	0	13	0	0	0		0	0		0	0		0	0		0	0		0	1	0
	18	16200155	T	<*>	0	25	0	0	12	0	0	0		0	0		0	0		0	0		0	0		0	1	0
	18	16200156	A	<*>	0	25	0	0	12	0	0	0		0	0		0	0		0	0		0	0		0	1	0
	18	16200157	A	<*>	0	25	0	0	12	0	0	0		0	0		0	0		0	0		0	0		0	1	0
	18	16200158	T	<*>	0	24	0	0	12	0	0	0		0	0		0	0		0	0		0	0		0	1	0
	18	16200159	G	<*>	0	24	0	0	12	0	0	0		0	0		0	0		0	0		0	0		0	1	0
	18	16200160	A	<*>	0	24	0	0	12	0	0	0		0	0		0	0		0	0		0	0		0	1	0
	18	16200161	A	<*>	0	24	0	0	12	0	0	0		0	0		0	0		0	0		0	0		0	1	0
	18	16200162	A	<*>	0	26	0	0	12	0	0	0		0	0		0	0		0	0		0	0		0	1	0
	18	16200163	A	<*>	0	26	0	0	12	0	0	0		0	0		0	0		0	0		0	0		0	1	0
	18	16200164	T	C	10	16	0.384615	0	11	0	0	0		0	0		0	0		0	0		0	0		1	0	1
	18	16200165	G	<*>	0	26	0	0	11	0	0	0		0	0		0	0		0	0		0	0		0	1	0
	18	16200166	T	<*>	0	26	0	0	11	0	0	0		0	0		0	0		0	0		0	0		0	1	0
	18	16200167	T	<*>	0	25	0	0	12	0	0	0		0	0		0	0		0	0		0	0		0	1	0
	18	16200168	G	<*>	0	24	0	0	12	0	0	0		0	0		0	0		0	0		0	0		0	1	0
	18	16200169	T	<*>	0	24	0	0	12	0	0	0		0	0		0	0		0	0		0	0		0	1	0
	18	16200170	G	<*>	0	24	0	0	12	0	0	0		0	0		0	0		0	0		0	0		0	1	0
	18	16200171	A	<*>	0	24	0	0	12	0	0	0		0	0		0	0		0	0		0	0		0	1	0
	18	16200172	A	<*>	0	25	0	0	12	0	0	0		0	0		0	0		0	0		0	0		0	1	0
	18	16200173	G	T	0	25	0	0	12	0	0	0		0	0		0	0		0	0		0	0		0	1	0
	18	16200174	G	<*>	0	25	0	0	12	0	0	0		0	0		0	0		0	0		0	0		0	1	0
	18	16200175	A	<*>	0	25	0	0	11	0	0	0		0	0		0	0		0	0		0	0		0	1	0
	18	16200176	A	<*>	0	25	0	0	11	0	0	0		0	0		0	0		0	0		0	0		0	1	0
	18	16200177	G	<*>	0	25	0	0	11	0	0	0		0	0		0	0		0	0		0	0		0	1	0
	18	16200178	A	<*>	0	25	0	0	11	0	0	0		0	0		0	0		0	0		0	0		0	1	0
	18	16200179	T	<*>	0	25	0	0	11	0	0	0		0	0		0	0		0	0		0	0		0	1	0
	18	16200180	T	<*>	0	25	0	0	11	0	0	0		0	0		0	0		0	0		0	0		0	1	0
	18	16200181	G	<*>	0	25	0	0	11	0	0	0		0	0		0	0		0	0		0	0		0	1	0
	18	16200182	A	<*>	0	25	0	0	11	0	0	0		0	0		0	0		0	0		0	0		0	1	0
	18	16200183	A	<*>	0	25	0	0	11	0	0	0		0	0		0	0		0	0		0	0		0	1	0
	18	16200184	T	<*>	0	25	0	0	11	0	0	0		0	0		0	0		0	0		0	0		0	1	0
	18	16200185	A	<*>	0	25	0	0	11	0	0	0		0	0		0	0		0	0		0	0		0	1	0
	18	16200186	T	<*>	0	25	0	0	11	0	0	0		0	0		0	0		0	0		0	0		0	1	0
	18	16200187	A	<*>	0	25	0	0	11	0	0	0		0	0		0	0		0	0		0	0		0	1	0
	18	16200188	G	<*>	0	25	0	0	11	0	0	0		0	0		0	0		0	0		0	0		0	1	0
	18	16200189	G	<*>	0	25	0	0	11	0	0	0		0	0		0	0		0	0		0	0		0	1	0
	18	16200190	T	<*>	0	25	0	0	11	0	0	0		0	0		0	0		0	0		0	0		0	1	0
	18	16200191	G	<*>	0	25	0	0	11	0	0	0		0	0		0	0		0	0		0	0		0	1	0
	18	16200192	T	<*>	0	24	0	0	13	0	0	0		0	0		0	0		0	0		0	0		0	1	0
	18	16200193	T	<*>	0	24	0	0	13	0	0	0		0	0		0	0		0	0		0	0		0	1	0
	18	16200194	G	<*>	0	24	0	0	13	0	0	0		0	0		0	0		0	0		0	0		0	1	0
	18	16200195	T	A	0	23	0	7	6	0.538462	0	0		0	0		0	0		0	0		0	0		0	1	0
	18	16200196	A	<*>	0	23	0	0	13	0	0	0		0	0		0	0		0	0		0	0		0	1	0
	18	16200197	A	<*>	0	22	0	0	13	0	0	0		0	0		0	0		0	0		0	0		0	1	0
	18	16200198	C	<*>	0	22	0	0	13	0	0	0		0	0		0	0		0	0		0	0		0	1	0
	18	16200199	A	<*>	0	23	0	0	13	0	0	0		0	0		0	0		0	0		0	0		0	1	0
	18	16200200	A	<*>	0	23	0	0	13	0	0	0		0	0		0	0		0	0		0	0		0	1	0
	18	16200201	G	<*>	0	23	0	0	13	0	0	0		0	0		0	0		0	0		0	0		0	1	0
	18	16200202	A	<*>	0	22	0	0	12	0	0	0		0	0		0	0		0	0		0	0		0	1	0
	18	16200203	G	<*>	0	22	0	0	11	0	0	0		0	0		0	0		0	0		0	0		0	1	0
	18	16200204	A	<*>	0	22	0	0	12	0	0	0		0	0		0	0		0	0		0	0		0	1	0
	18	16200205	T	<*>	0	22	0	0	12	0	0	0		0	0		0	0		0	0		0	0		0	0
	18	16200206	G	<*>	0	22	0	0	13	0	0	0		0	0		0	0		0	0		0	0		0	0
	18	16200207	T	G	7	15	0.318182	5	8	0.384615	0	0		0	0		0	0		0	0		0	0		0	0
	18	16200208	A	<*>	0	22	0	0	12	0	0	0		0	0		0	0		0	0		0	0		0	0
	18	16200209	A	<*>	0	22	0	0	11	0	0	0		0	0		0	0		0	0		0	0		0	0
	18	16200210	C	<*>	0	22	0	0	11	0	0	0		0	0		0	0		0	0		0	0		0	0
	18	16200211	A	<*>	0	22	0	0	13	0	0	0		0	0		0	0		0	0		0	0		0	0
	18	16200212	A	<*>	0	22	0	0	14	0	0	0		0	0		0	0		0	0		0	0		0	0
	18	16200213	A	<*>	0	22	0	0	14	0	0	0		0	0		0	0		0	0		0	0		0	0
	18	16200215	G	<*>	0	21	0	0	13	0	0	0		0	0		0	0		0	0		0	0		0	0
	18	16200216	C	<*>	0	20	0	0	12	0	0	0		0	0		0	0		0	0		0	0		0	0
	18	16200217	A	<*>	0	20	0	0	12	0	0	0		0	0		0	0		0	0		0	0		0	0
	18	16200218	A	<*>	0	21	0	0	12	0	0	0		0	0		0	0		0	0		0	0		0	0
	18	16200219	A	<*>	0	21	0	0	12	0	0	0		0	0		0	0		0	0		0	0		0	0
	18	16200220	A	<*>	0	21	0	0	12	0	0	0		0	0		0	0		0	0		0	0		0	0
	18	16200221	C	<*>	0	21	0	0	13	0	0	0		0	0		0	0		0	0		0	0		0	0
	18	16200222	A	<*>	0	22	0	0	14	0	0	0		0	0		0	0		0	0		0	0		0	0
	18	16200223	A	<*>	0	24	0	0	14	0	0	0		0	0		0	0		0	0		0	0		0	0
	18	16200224	A	<*>	0	24	0	0	14	0	0	0		0	0		0	0		0	0		0	0		0	0
	18	16200225	T	<*>	0	24	0	0	14	0	0	0		0	0		0	0		0	0		0	0		0	0
	18	16200226	A	<*>	0	24	0	0	14	0	0	0		0	0		0	0		0	0		0	0		0	0
	18	16200227	A	<*>	0	25	0	0	13	0	0	0		0	0		0	0		0	0		0	0		0	0
	18	16200228	G	<*>	0	25	0	0	13	0	0	0		0	0		0	0		0	0		0	0		0	0
	18	16200229	C	<*>	0	25	0	0	13	0	0	0		0	0		0	0		0	0		0	0		0	0
	18	16200230	C	<*>	0	25	0	0	13	0	0	0		0	0		0	0		0	0		0	0		0	0
	18	16200232	C	CT	4	1	0.8	6	0	1	0	0		0	0		0	0		0	0		0	0		0	0
	18	16200232	C	T	15	1	0.9375	0	0		0	0		0	0		0	0		0	0		0	0		0	0
	18	16200232	C	TT	0	1	0	0	0		0	0		0	0		0	0		0	0		0	0		0	0
	18	16200242	CAT	TCAC	0	1	0	0	0		0	0		0	0		0	0		0	0		0	0		0	0
	18	16200243	A	G	0	1	0	0	0		0	0		0	0		0	0		0	0		0	0		0	0
	18	16200246	T	<*>	0	23	0	0	13	0	0	0		0	0		0	0		0	0		0	0		0	0
	18	16200247	G	<*>	0	23	0	0	13	0	0	0		0	0		0	0		0	0		0	0		0	0
	18	16200248	A	<*>	0	24	0	0	13	0	0	0		0	0		0	0		0	0		0	0		0	0
	18	16200249	A	<*>	0	25	0	0	13	0	0	0		0	0		0	0		0	0		0	0		0	0
	18	16200250	A	<*>	0	25	0	0	13	0	0	0		0	0		0	0		0	0		0	0		0	0
	18	16200251	A	<*>	0	24	0	0	13	0	0	0		0	0		0	0		0	0		0	0		0	0
	18	16200252	A	<*>	0	24	0	0	13	0	0	0		0	0		0	0		0	0		0	0		0	0
	18	16200253	C	<*>	0	24	0	0	14	0	0	0		0	0		0	0		0	0		0	0		0	0
	18	16200254	T	<*>	0	24	0	0	13	0	0	0		0	0		0	0		0	0		0	0		0	0
	18	16200255	A	<*>	0	24	0	0	14	0	0	0		0	0		0	0		0	0		0	0		0	0
	18	16200256	T	<*>	0	24	0	0	14	0	0	0		0	0		0	0		0	0		0	0		0	0
	18	16200257	T	<*>	0	25	0	0	14	0	0	0		0	0		0	0		0	0		0	0		0	0
	18	16200258	T	<*>	0	24	0	0	14	0	0	0		0	0		0	0		0	0		0	0		0	0
	18	16200259	A	<*>	0	23	0	0	14	0	0	0		0	0		0	0		0	0		0	0		0	0
	18	16200260	C	<*>	0	22	0	0	15	0	0	0		0	0		0	0		0	0		0	0		0	0
	18	16200261	A	<*>	0	22	0	0	15	0	0	0		0	0		0	0		0	0		0	0		0	0
	18	16200262	T	<*>	0	22	0	0	15	0	0	0		0	0		0	0		0	0		0	0		0	0
	18	16200263	T	<*>	0	24	0	0	15	0	0	0		0	0		0	0		0	0		0	0		0	0
	18	16200264	A	G	9	15	0.375	6	9	0.4	0	0		0	0		0	0		0	0		0	0		0	0
	18	16200267	A	<*>	0	23	0	0	15	0	0	0		0	0		0	0		0	0		0	0		0	0
	18	16200268	A	<*>	0	22	0	0	15	0	0	0		0	0		0	0		0	0		0	0		0	0
	18	16200269	A	<*>	0	22	0	0	15	0	0	0		0	0		0	0		0	0		0	0		0	0
	18	16200270	A	<*>	0	22	0	0	15	0	0	0		0	0		0	0		0	0		0	0		0	0
	18	16200271	C	<*>	0	22	0	0	15	0	0	0		0	0		0	0		0	0		0	0		0	0
	18	16200272	C	<*>	0	23	0	0	15	0	0	0		0	0		0	0		0	0		0	0		0	0
	18	16200273	A	<*>	0	22	0	0	15	0	0	0		0	0		0	0		0	0		0	0		0	0
	18	16200274	T	<*>	0	22	0	0	15	0	0	0		0	0		0	0		0	0		0	0		0	0
	18	16200275	A	<*>	0	22	0	0	14	0	0	0		0	0		0	0		0	0		0	0		0	0
	18	16200276	G	<*>	0	22	0	0	14	0	0	0		0	0		0	0		0	0		0	0		0	0
	18	16200277	C	<*>	0	22	0	0	15	0	0	0		0	0		0	0		0	0		0	0		0	0
	18	16200278	A	<*>	0	22	0	0	15	0	0	0		0	0		0	0		0	0		0	0		0	0
	18	16200279	A	<*>	0	23	0	0	15	0	0	0		0	0		0	0		0	0		0	0		0	0
	18	16200280	C	<*>	0	23	0	0	15	0	0	0		0	0		0	0		0	0		0	0		0	0
	18	16200281	T	<*>	0	23	0	0	15	0	0	0		0	0		0	0		0	0		0	0		0	0
	18	16200282	G	<*>	0	24	0	0	15	0	0	0		0	0		0	0		0	0		0	0		0	0
	18	16200283	C	<*>	0	24	0	0	15	0	0	0		0	0		0	0		0	0		0	0		0	0
	18	16200284	A	<*>	0	24	0	0	14	0	0	0		0	0		0	0		0	0		0	0		0	0
	18	16200285	T	C	0	24	0	9	6	0.6	0	0		0	0		0	0		0	0		0	0		0	0
	18	16200286	C	<*>	0	23	0	0	15	0	0	0		0	0		0	0		0	0		0	0		0	0
	18	16200287	A	<*>	0	22	0	0	15	0	0	0		0	0		0	0		0	0		0	0		0	0
	18	16200288	A	G	0	22	0	0	16	0	0	0		0	0		0	0		0	0		0	0		0	0
	18	16200289	T	<*>	0	22	0	0	15	0	0	0		0	0		0	0		0	0		0	0		0	0
	18	16200290	C	<*>	0	22	0	0	15	0	0	0		0	0		0	0		0	0		0	0		0	0
	18	16200291	T	<*>	0	22	0	0	15	0	0	0		0	0		0	0		0	0		0	0		0	0
	18	16200292	T	<*>	0	22	0	0	14	0	0	0		0	0		0	0		0	0		0	0		0	0
	18	16200293	T	<*>	0	22	0	0	14	0	0	0		0	0		0	0		0	0		0	0		0	0
	18	16200294	G	<*>	0	23	0	0	14	0	0	0		0	0		0	0		0	0		0	0		0	0
	18	16200295	C	<*>	0	23	0	0	14	0	0	0		0	0		0	0		0	0		0	0		0	0
	18	16200296	G	A	12	11	0.521739	0	14	0	0	0		0	0		0	0		0	0		0	0		0	0
	18	16200297	C	<*>	0	22	0	0	13	0	0	0		0	0		0	0		0	0		0	0		0	0
	18	16200298	T	<*>	0	22	0	0	13	0	0	0		0	0		0	0		0	0		0	0		0	0
	18	16200299	G	<*>	0	22	0	0	14	0	0	0		0	0		0	0		0	0		0	0		0	0
	18	16200300	C	<*>	0	22	0	0	14	0	0	0		0	0		0	0		0	0		0	0		0	0
	18	16200301	A	<*>	0	22	0	0	14	0	0	0		0	0		0	0		0	0		0	0		0	0
	18	16200302	T	<*>	0	22	0	0	14	0	0	0		0	0		0	0		0	0		0	0		0	0
	18	16200303	G	<*>	0	22	0	0	14	0	0	0		0	0		0	0		0	0		0	0		0	0
	18	16200304	G	<*>	0	23	0	0	14	0	0	0		0	0		0	0		0	0		0	0		0	0
	18	16200305	A	<*>	0	23	0	0	14	0	0	0		0	0		0	0		0	0		0	0		0	0
	18	16200306	G	<*>	0	23	0	0	14	0	0	0		0	0		0	0		0	0		0	0		0	0
	18	16200307	T	<*>	0	23	0	0	14	0	0	0		0	0		0	0		0	0		0	0		0	0
	18	16200308	C	<*>	0	23	0	0	14	0	0	0		0	0		0	0		0	0		0	0		0	0
	18	16200309	A	<*>	0	23	0	0	13	0	0	0		0	0		0	0		0	0		0	0		0	0
	18	16200310	C	G	10	13	0.434783	6	7	0.461538	0	0		0	0		0	0		0	0		0	0		0	0
	18	16200311	A	<*>	0	24	0	0	13	0	0	0		0	0		0	0		0	0		0	0		0	0
	18	16200312	G	<*>	0	24	0	0	12	0	0	0		0	0		0	0		0	0		0	0		0	0
	18	16200313	A	<*>	0	23	0	0	11	0	0	0		0	0		0	0		0	0		0	0		0	0
	18	16200314	C	<*>	0	23	0	0	11	0	0	0		0	0		0	0		0	0		0	0		0	0
	18	16200315	A	<*>	0	23	0	0	11	0	0	0		0	0		0	0		0	0		0	0		0	0
	18	16200316	C	<*>	0	23	0	0	12	0	0	0		0	0		0	0		0	0		0	0		0	0
	18	16200317	C	<*>	0	24	0	0	11	0	0	0		0	0		0	0		0	0		0	0		0	0
	18	16200318	C	<*>	0	24	0	0	12	0	0	0		0	0		0	0		0	0		0	0		0	0
	18	16200319	A	G	0	24	0	0	12	0	0	0		0	0		0	0		0	0		0	0		0	0
	18	16200320	C	<*>	0	25	0	0	12	0	0	0		0	0		0	0		0	0		0	0		0	0
	18	16200321	A	<*>	0	25	0	0	12	0	0	0		0	0		0	0		0	0		0	0		0	0
	18	16200322	C	<*>	0	25	0	0	12	0	0	0		0	0		0	0		0	0		0	0		0	0
	18	16200323	A	<*>	0	26	0	0	12	0	0	0		0	0		0	0		0	0		0	0		0	0
	18	16200324	G	<*>	0	24	0	0	12	0	0	0		0	0		0	0		0	0		0	0		0	0
	18	16200325	A	<*>	0	24	0	0	12	0	0	0		0	0		0	0		0	0		0	0		0	0
	18	16200326	C	<*>	0	24	0	0	12	0	0	0		0	0		0	0		0	0		0	0		0	0
	18	16200327	A	<*>	0	24	0	0	12	0	0	0		0	0		0	0		0	0		0	0		0	0
	18	16200328	G	<*>	0	27	0	0	12	0	0	0		0	0		0	0		0	0		0	0		0	0
	18	16200329	T	<*>	0	27	0	0	13	0	0	0		0	0		0	0		0	0		0	0		0	0
	18	16200330	A	<*>	0	26	0	0	13	0	0	0		0	0		0	0		0	0		0	0		0	0
	18	16200331	T	<*>	0	26	0	0	13	0	0	0		0	0		0	0		0	0		0	0		0	0
	18	16200332	A	<*>	0	26	0	0	13	0	0	0		0	0		0	0		0	0		0	0		0	0
	18	16200333	A	<*>	0	27	0	0	12	0	0	0		0	0		0	0		0	0		0	0		0	0
	18	16200335	A	<*>	0	27	0	0	8	0	0	0		0	0		0	0		0	0		0	0		0	0
	18	16200336	A	<*>	0	27	0	0	7	0	0	0		0	0		0	0		0	0		0	0		0	0
	18	16200337	A	<*>	0	27	0	0	11	0	0	0		0	0		0	0		0	0		0	0		0	0
	18	16200338	T	<*>	0	27	0	0	11	0	0	0		0	0		0	0		0	0		0	0		0	0
	18	16200339	C	<*>	0	29	0	0	11	0	0	0		0	0		0	0		0	0		0	0		0	0
	18	16200340	A	<*>	0	28	0	0	11	0	0	0		0	0		0	0		0	0		0	0		0	0
	18	16200341	G	<*>	0	29	0	0	11	0	0	0		0	0		0	0		0	0		0	0		0	0
	18	16200342	T	<*>	0	28	0	0	11	0	0	0		0	0		0	0		0	0		0	0		0	0
	18	16200343	A	<*>	0	28	0	0	11	0	0	0		0	0		0	0		0	0		0	0		0	0
	18	16200344	T	<*>	0	28	0	0	12	0	0	0		0	0		0	0		0	0		0	0		0	0
	18	16200345	A	<*>	0	28	0	0	13	0	0	0		0	0		0	0		0	0		0	0		0	0
	18	16200346	T	<*>	0	28	0	0	13	0	0	0		0	0		0	0		0	0		0	0		0	0
	18	16200347	A	<*>	0	28	0	0	13	0	0	0		0	0		0	0		0	0		0	0		0	0
	18	16200348	T	<*>	0	28	0	0	13	0	0	0		0	0		0	0		0	0		0	0		0	0
	18	16200349	A	<*>	0	29	0	0	13	0	0	0		0	0		0	0		0	0		0	0		0	0
	18	16200350	A	<*>	0	29	0	0	14	0	0	0		0	0		0	0		0	0		0	0		0	0
	18	16200351	T	<*>	0	27	0	0	14	0	0	0		0	0		0	0		0	0		0	0		0	0
	18	16200352	C	<*>	0	27	0	0	14	0	0	0		0	0		0	0		0	0		0	0		0	0
	18	16200353	G	<*>	0	27	0	0	15	0	0	0		0	0		0	0		0	0		0	0		0	0
	18	16200354	G	<*>	0	27	0	0	15	0	0	0		0	0		0	0		0	0		0	0		0	0
	18	16200355	G	<*>	0	27	0	0	15	0	0	0		0	0		0	0		0	0		0	0		0	0
	18	16200356	A	<*>	0	27	0	0	15	0	0	0		0	0		0	0		0	0		0	0		0	0
	18	16200357	T	<*>	0	27	0	0	15	0	0	0		0	0		0	0		0	0		0	0		0	0
	18	16200358	C	<*>	0	27	0	0	15	0	0	0		0	0		0	0		0	0		0	0		0	0
	18	16200359	A	<*>	0	27	0	0	15	0	0	0		0	0		0	0		0	0		0	0		0	0
	18	16200360	A	<*>	0	27	0	0	15	0	0	0		0	0		0	0		0	0		0	0		0	0
	18	16200361	T	<*>	0	27	0	0	15	0	0	0		0	0		0	0		0	0		0	0		0	0
	18	16200362	A	<*>	0	27	0	0	15	0	0	0		0	0		0	0		0	0		0	0		0	0
	18	16200363	C	<*>	0	27	0	0	15	0	0	0		0	0		0	0		0	0		0	0		0	0
	18	16200364	C	<*>	0	27	0	0	15	0	0	6	0	0	7	0	0	8	0	0	7	0	0	7	0	0	9	0
	18	16200365	T	<*>	0	27	0	0	15	0	0	6	0	0	7	0	0	9	0	0	7	0	0	7	0	0	9	0
	18	16200366	C	<*>	0	27	0	0	15	0	0	6	0	0	8	0	0	9	0	0	7	0	0	7	0	0	9	0
	18	16200367	T	<*>	0	28	0	0	12	0	0	6	0	0	8	0	0	9	0	0	7	0	0	7	0	0	9	0
	18	16200368	A	<*>	0	28	0	0	12	0	0	6	0	0	8	0	0	9	0	0	7	0	0	7	0	0	9	0
	18	16200369	T	<*>	0	26	0	0	12	0	0	6	0	0	8	0	0	9	0	0	7	0	0	7	0	0	9	0
	18	16200370	G	<*>	0	26	0	0	12	0	0	6	0	0	8	0	0	10	0	0	7	0	0	7	0	0	9	0
	18	16200371	T	<*>	0	24	0	0	12	0	0	6	0	0	8	0	0	10	0	0	7	0	0	7	0	0	9	0
	18	16200372	G	<*>	0	23	0	0	13	0	0	6	0	0	8	0	0	10	0	0	7	0	0	7	0	0	10	0
	18	16200373	C	<*>	0	23	0	0	14	0	0	6	0	0	8	0	0	10	0	0	7	0	0	7	0	0	10	0
	18	16200374	A	<*>	0	23	0	0	14	0	0	6	0	0	8	0	0	10	0	0	7	0	0	7	0	0	10	0
	18	16200375	T	<*>	0	23	0	0	14	0	0	6	0	0	8	0	0	10	0	0	7	0	0	7	0	0	10	0
	18	16200376	A	<*>	0	23	0	0	15	0	0	7	0	0	8	0	0	11	0	0	7	0	0	10	0	0	10	0
	18	16200377	G	<*>	0	23	0	0	16	0	0	7	0	0	7	0	0	11	0	0	7	0	0	10	0	0	10	0
	18	16200378	C	<*>	0	23	0	0	16	0	0	7	0	0	7	0	0	10	0	0	7	0	0	10	0	0	9	0
	18	16200379	T	<*>	0	24	0	0	16	0	0	6	0	0	7	0	0	9	0	0	7	0	0	10	0	0	9	0
	18	16200380	T	<*>	0	24	0	0	16	0	0	5	0	0	7	0	0	9	0	0	7	0	0	10	0	0	9	0
	18	16200381	T	<*>	0	23	0	0	16	0	0	5	0	0	7	0	0	9	0	0	6	0	0	10	0	0	9	0
	18	16200382	C	<*>	0	22	0	0	15	0	0	5	0	0	7	0	0	10	0	0	6	0	0	9	0	0	8	0
	18	16200383	C	<*>	0	22	0	0	15	0	0	5	0	0	7	0	0	10	0	0	6	0	0	10	0	0	8	0
	18	16200384	C	<*>	0	22	0	0	15	0	0	5	0	0	7	0	0	11	0	0	5	0	0	10	0	0	8	0
	18	16200385	T	<*>	0	22	0	0	15	0	0	5	0	0	7	0	0	11	0	0	5	0	0	10	0	0	8	0
	18	16200386	A	<*>	0	21	0	0	15	0	0	5	0	0	7	0	0	11	0	0	5	0	0	10	0	0	8	0
	18	16200387	T	<*>	0	21	0	0	15	0	0	5	0	0	7	0	0	11	0	0	5	0	0	10	0	0	8	0
	18	16200388	T	<*>	0	21	0	0	15	0	0	5	0	0	7	0	0	11	0	0	5	0	0	9	0	0	8	0
	18	16200389	T	<*>	0	21	0	0	15	0	0	5	0	0	7	0	0	11	0	0	6	0	0	9	0	0	8	0
	18	16200390	T	<*>	0	21	0	0	15	0	0	5	0	0	6	0	0	11	0	0	6	0	0	9	0	0	6	0
	18	16200391	C	<*>	0	21	0	0	15	0	0	5	0	0	7	0	0	11	0	0	6	0	0	10	0	0	7	0
	18	16200392	C	<*>	0	21	0	0	15	0	0	5	0	0	7	0	0	11	0	0	6	0	0	10	0	0	7	0
	18	16200393	A	<*>	0	21	0	0	15	0	0	5	0	0	7	0	0	11	0	0	6	0	0	10	0	0	5	0
	18	16200394	A	<*>	0	21	0	0	15	0	0	5	0	0	7	0	0	10	0	0	5	0	0	10	0	0	5	0
	18	16200395	A	<*>	0	21	0	0	15	0	0	5	0	0	7	0	0	10	0	0	5	0	0	10	0	0	5	0
	18	16200396	A	<*>	0	21	0	0	15	0	0	5	0	0	7	0	0	10	0	0	5	0	0	10	0	0	5	0
	18	16200397	C	<*>	0	20	0	0	15	0	0	5	0	0	7	0	0	10	0	0	5	0	0	10	0	0	5	0
	18	16200398	T	<*>	0	20	0	0	15	0	0	5	0	0	7	0	0	10	0	0	5	0	0	10	0	0	5	0
	18	16200399	C	<*>	0	20	0	0	15	0	0	5	0	0	7	0	0	10	0	0	5	0	0	10	0	0	5	0
	18	16200400	A	<*>	0	20	0	0	15	0	0	5	0	0	7	0	0	10	0	0	5	0	0	10	0	0	5	0
	18	16200401	A	<*>	0	21	0	0	14	0	0	5	0	0	7	0	0	10	0	0	5	0	0	10	0	0	5	0
	18	16200402	T	<*>	0	22	0	0	14	0	0	4	0	0	6	0	0	10	0	0	5	0	0	10	0	0	5	0
	18	16200403	G	<*>	0	23	0	0	14	0	0	4	0	0	7	0	0	10	0	0	5	0	0	10	0	0	5	0
	18	16200404	C	<*>	0	24	0	0	14	0	0	4	0	0	7	0	0	10	0	0	5	0	0	9	0	0	5	0
	18	16200405	A	<*>	0	24	0	0	14	0	0	4	0	0	7	0	0	10	0	0	5	0	0	9	0	0	6	0
	18	16200406	G	<*>	0	24	0	0	14	0	0	4	0	0	7	0	0	10	0	0	6	0	0	9	0	0	6	0
	18	16200407	C	<*>	0	23	0	0	14	0	0	4	0	0	7	0	0	10	0	0	6	0	0	9	0	0	5	0
	18	16200408	A	<*>	0	23	0	0	17	0	0	4	0	0	7	0	0	10	0	0	6	0	0	9	0	0	5	0
	18	16200409	A	<*>	0	23	0	0	17	0	0	4	0	0	6	0	0	10	0	0	6	0	0	9	0	0	5	0
	18	16200410	C	<*>	0	23	0	0	17	0	0	4	0	0	6	0	0	10	0	0	6	0	0	9	0	0	5	0
	18	16200411	C	<*>	0	25	0	0	18	0	0	4	0	0	6	0	0	10	0	0	6	0	0	9	0	0	5	0
	18	16200412	A	<*>	0	26	0	0	17	0	0	4	0	0	6	0	0	10	0	0	5	0	0	9	0	0	5	0
	18	16200413	A	<*>	0	26	0	0	17	0	0	4	0	0	6	0	0	10	0	0	5	0	0	9	0	0	5	0
	18	16200414	T	<*>	0	26	0	0	17	0	0	4	0	0	7	0	0	10	0	0	5	0	0	9	0	0	5	0
	18	16200415	C	<*>	0	27	0	0	17	0	0	4	0	0	7	0	0	11	0	0	6	0	0	9	0	0	5	0
	18	16200416	C	<*>	0	27	0	0	17	0	0	4	0	0	7	0	0	12	0	0	6	0	0	9	0	0	5	0
	18	16200417	C	<*>	0	27	0	0	17	0	0	4	0	0	7	0	0	12	0	0	6	0	0	9	0	0	5	0
	18	16200418	A	<*>	0	27	0	0	17	0	0	4	0	0	7	0	0	12	0	0	6	0	0	9	0	0	5	0
	18	16200419	G	<*>	0	28	0	0	17	0	0	4	0	0	7	0	0	13	0	0	6	0	0	9	0	0	5	0
	18	16200420	A	<*>	0	28	0	0	17	0	0	4	0	0	7	0	0	13	0	0	6	0	0	9	0	0	5	0
	18	16200421	A	<*>	0	29	0	0	16	0	0	4	0	0	7	0	0	13	0	0	6	0	0	9	0	0	5	0
	18	16200422	C	<*>	0	29	0	0	16	0	0	4	0	0	7	0	0	13	0	0	6	0	0	9	0	0	6	0
	18	16200423	T	<*>	0	29	0	0	16	0	0	4	0	0	7	0	0	13	0	0	6	0	0	9	0	0	6	0
	18	16200424	T	<*>	0	29	0	0	16	0	0	4	0	0	7	0	0	13	0	0	6	0	0	9	0	0	6	0
	18	16200425	C	<*>	0	29	0	0	16	0	0	4	0	0	7	0	0	13	0	0	6	0	0	9	0	0	6	0
	18	16200426	C	<*>	0	29	0	0	18	0	0	4	0	0	7	0	0	13	0	0	6	0	0	9	0	0	6	0
	18	16200427	A	<*>	0	29	0	0	18	0	0	4	0	0	7	0	0	13	0	0	6	0	0	7	0	0	6	0
	18	16200428	A	<*>	0	29	0	0	18	0	0	4	0	0	7	0	0	13	0	0	6	0	0	7	0	0	6	0
	18	16200429	G	<*>	0	28	0	0	18	0	0	4	0	0	7	0	0	13	0	0	6	0	0	6	0	0	6	0
	18	16200430	T	<*>	0	27	0	0	18	0	0	4	0	0	7	0	0	13	0	0	6	0	0	6	0	0	6	0
	18	16200431	A	<*>	0	28	0	0	18	0	0	4	0	0	7	0	0	13	0	0	6	0	0	6	0	0	6	0
	18	16200432	T	<*>	0	28	0	0	18	0	0	4	0	0	6	0	0	13	0	0	6	0	0	6	0	0	6	0
	18	16200433	C	<*>	0	28	0	0	19	0	0	4	0	0	6	0	0	12	0	0	6	0	0	6	0	0	5	0
	18	16200434	A	<*>	0	27	0	0	19	0	0	3	0	0	6	0	0	12	0	0	6	0	0	6	0	0	5	0
	18	16200435	T	<*>	0	27	0	0	18	0	0	3	0	0	6	0	0	11	0	0	6	0	0	6	0	0	5	0
	18	16200436	C	<*>	0	27	0	0	18	0	0	3	0	0	6	0	0	11	0	0	6	0	0	6	0	0	5	0
	18	16200437	C	<*>	0	27	0	0	19	0	0	3	0	0	6	0	0	11	0	0	5	0	0	6	0	0	5	0
	18	16200438	A	<*>	0	27	0	0	17	0	0	3	0	0	7	0	0	11	0	0	6	0	0	6	0	0	5	0
	18	16200439	T	<*>	0	27	0	0	17	0	0	3	0	0	7	0	0	11	0	0	7	0	0	6	0	0	5	0
	18	16200440	G	<*>	0	28	0	0	17	0	0	3	0	0	7	0	0	11	0	0	7	0	0	6	0	0	6	0
	18	16200441	A	<*>	0	28	0	0	17	0	0	3	0	0	7	0	0	11	0	0	7	0	0	6	0	0	6	0
	18	16200442	A	<*>	0	28	0	0	17	0	0	3	0	0	7	0	0	11	0	0	7	0	0	6	0	0	6	0
	18	16200443	G	<*>	0	28	0	0	18	0	0	3	0	0	7	0	0	11	0	0	7	0	0	6	0	0	6	0
	18	16200444	T	<*>	0	26	0	0	18	0	0	3	0	0	7	0	0	11	0	0	7	0	0	6	0	0	6	0
	18	16200445	G	<*>	0	26	0	0	18	0	0	3	0	0	8	0	0	11	0	0	7	0	0	6	0	0	6	0
	18	16200446	T	<*>	0	26	0	0	18	0	0	3	0	0	8	0	0	11	0	0	7	0	0	6	0	0	6	0
	18	16200447	C	<*>	0	26	0	0	18	0	0	1	0	0	6	0	0	8	0	0	6	0	0	6	0	0	5	0
	18	16200448	A	<*>	0	26	0	0	18	0	0	1	0	0	6	0	0	8	0	0	5	0	0	6	0	0	5	0
	18	16200449	T	<*>	0	26	0	0	18	0	0	1	0	0	6	0	0	8	0	0	5	0	0	6	0	0	5	0
	18	16200450	T	<*>	0	26	0	0	19	0	0	1	0	0	6	0	0	8	0	0	5	0	0	6	0	0	5	0
	18	16200451	G	<*>	0	26	0	0	19	0	0	1	0	0	7	0	0	7	0	0	5	0	0	6	0	0	5	0
	18	16200452	T	<*>	0	25	0	0	19	0	0	1	0	0	6	0	0	7	0	0	5	0	0	6	0	0	5	0
	18	16200453	C	<*>	0	25	0	0	18	0	0	1	0	0	6	0	0	8	0	0	6	0	0	6	0	0	5	0
	18	16200454	A	T	0	25	0	10	8	0.555556	0	1	0	1	5	0.166667	0	8	0	0	7	0	0	6	0	0	5	0
	18	16200455	A	<*>	0	25	0	0	18	0	0	1	0	0	6	0	0	8	0	0	7	0	0	6	0	0	6	0
	18	16200456	G	<*>	0	25	0	0	18	0	0	1	0	0	6	0	0	7	0	0	7	0	0	6	0	0	6	0
	18	16200457	C	<*>	0	25	0	0	18	0	0	1	0	0	6	0	0	7	0	0	7	0	0	6	0	0	6	0
	18	16200458	A	<*>	0	24	0	0	18	0	0	1	0	0	6	0	0	7	0	0	7	0	0	6	0	0	5	0
	18	16200459	G	<*>	0	23	0	0	18	0	0	1	0	0	6	0	0	7	0	0	7	0	0	6	0	0	5	0
	18	16200460	A	<*>	0	23	0	0	18	0	0	1	0	0	6	0	0	7	0	0	7	0	0	5	0	0	5	0
	18	16200461	T	<*>	0	23	0	0	18	0	0	1	0	0	6	0	0	7	0	0	7	0	0	5	0	0	5	0
	18	16200462	A	<*>	0	23	0	0	18	0	0	0		0	6	0	0	6	0	0	7	0	0	3	0	0	5	0
	18	16200463	G	T	0	22	0	8	10	0.444444	0	0		5	1	0.833333	6	0	1	0	7	0	0	3	0	0	5	0
	18	16200464	A	<*>	0	21	0	0	18	0	0	0		0	6	0	0	6	0	0	7	0	0	3	0	0	5	0
	18	16200465	G	<*>	0	20	0	0	18	0	0	0		0	6	0	0	7	0	0	7	0	0	3	0	0	5	0
	18	16200466	A	<*>	0	20	0	0	18	0	0	0		0	6	0	0	7	0	0	7	0	0	4	0	0	8	0
	18	16200467	A	<*>	0	20	0	0	18	0	0	0		0	6	0	0	7	0	0	7	0	0	4	0	0	8	0
	18	16200468	A	<*>	0	20	0	0	18	0	0	0		0	6	0	0	6	0	0	8	0	0	4	0	0	8	0
	18	16200469	G	<*>	0	21	0	0	16	0	0	0		0	6	0	0	6	0	0	8	0	0	3	0	0	8	0
	18	16200470	A	<*>	0	21	0	0	16	0	0	0		0	6	0	0	5	0	0	8	0	0	3	0	0	8	0
	18	16200471	C	<*>	0	21	0	0	16	0	0	0		0	6	0	0	5	0	0	8	0	0	3	0	0	8	0
	18	16200472	A	<*>	0	22	0	0	16	0	0	0		0	6	0	0	5	0	0	8	0	0	3	0	0	8	0
	18	16200473	A	<*>	0	21	0	0	16	0	0	0		0	6	0	0	5	0	0	8	0	0	3	0	0	8	0
	18	16200474	T	<*>	0	21	0	0	16	0	0	0		0	6	0	0	5	0	0	8	0	0	3	0	0	8	0
	18	16200475	G	<*>	0	21	0	0	13	0	0	0		0	6	0	0	5	0	0	7	0	0	3	0	0	8	0
	18	16200476	A	<*>	0	21	0	0	13	0	0	0		0	5	0	0	5	0	0	7	0	0	3	0	0	8	0
	18	16200477	G	<*>	0	21	0	0	13	0	0	0		0	5	0	0	5	0	0	7	0	0	2	0	0	8	0
	18	16200478	C	<*>	0	20	0	0	12	0	0	0		0	5	0	0	5	0	0	7	0	0	2	0	0	8	0
	18	16200479	T	<*>	0	21	0	0	12	0	0	0		0	5	0	0	5	0	0	7	0	0	2	0	0	8	0
	18	16200480	G	<*>	0	21	0	0	12	0	0	0		0	5	0	0	5	0	0	7	0	0	2	0	0	8	0
	18	16200481	A	<*>	0	21	0	0	12	0	0	0		0	5	0	0	5	0	0	7	0	0	2	0	0	8	0
	18	16200482	G	<*>	0	21	0	0	12	0	0	0		0	5	0	0	5	0	0	7	0	0	2	0	0	8	0
	18	16200483	A	<*>	0	22	0	0	12	0	0	0		0	5	0	0	5	0	0	7	0	0	2	0	0	8	0
	18	16200484	T	<*>	0	22	0	0	12	0	0	0		0	5	0	0	5	0	0	7	0	0	2	0	0	8	0
	18	16200485	A	<*>	0	21	0	0	12	0	0	0		0	5	0	0	5	0	0	7	0	0	2	0	0	8	0
	18	16200486	T	<*>	0	21	0	0	11	0	0	0		0	5	0	0	5	0	0	7	0	0	2	0	0	8	0
	18	16200487	A	<*>	0	21	0	0	12	0	0	0		0	5	0	0	5	0	0	7	0	0	2	0	0	8	0
	18	16200488	A	<*>	0	21	0	0	12	0	0	0		0	5	0	0	5	0	0	7	0	0	2	0	0	8	0
	18	16200489	A	<*>	0	22	0	0	13	0	0	0		0	5	0	0	5	0	0	7	0	0	2	0	0	8	0
	18	16200490	G	<*>	0	23	0	0	13	0	0	0		0	5	0	0	5	0	0	8	0	0	3	0	0	8	0
	18	16200491	C	<*>	0	23	0	0	13	0	0	0		0	5	0	0	5	0	0	8	0	0	3	0	0	7	0
	18	16200492	T	<*>	0	23	0	0	13	0	0	0		0	6	0	0	5	0	0	7	0	0	3	0	0	7	0
	18	16200493	C	<*>	0	23	0	0	13	0	0	0		0	6	0	0	6	0	0	7	0	0	3	0	0	7	0
	18	16200494	A	<*>	0	23	0	0	13	0	0	0		0	6	0	0	6	0	0	7	0	0	3	0	0	7	0
	18	16200495	C	<*>	0	22	0	0	13	0	0	0		0	6	0	0	6	0	0	7	0	0	4	0	0	7	0
	18	16200496	A	<*>	0	22	0	0	13	0	0	0		0	6	0	0	6	0	0	7	0	0	4	0	0	7	0
	18	16200497	A	<*>	0	22	0	0	13	0	0	0		0	6	0	0	6	0	0	7	0	0	4	0	0	7	0
	18	16200498	C	<*>	0	22	0	0	14	0	0	0		0	9	0	0	6	0	0	7	0	0	4	0	0	7	0
	18	16200499	A	<*>	0	23	0	0	14	0	0	0		0	10	0	0	7	0	0	7	0	0	4	0	0	7	0
	18	16200500	A	<*>	0	23	0	0	14	0	0	0		0	9	0	0	7	0	0	6	0	0	4	0	0	7	0
	18	16200501	C	<*>	0	23	0	0	13	0	0	0		0	9	0	0	6	0	0	6	0	0	4	0	0	7	0
	18	16200502	A	<*>	0	23	0	0	13	0	0	0		0	9	0	0	5	0	0	6	0	0	4	0	0	7	0
	18	16200503	G	<*>	0	24	0	0	13	0	0	0		0	9	0	0	5	0	0	6	0	0	4	0	0	7	0
	18	16200504	A	<*>	0	24	0	0	13	0	0	0		0	9	0	0	4	0	0	6	0	0	4	0	0	7	0
	18	16200505	C	<*>	0	24	0	0	13	0	0	0		0	9	0	0	4	0	0	6	0	0	5	0	0	7	0
	18	16200506	T	<*>	0	24	0	0	13	0	0	0		0	9	0	0	4	0	0	6	0	0	5	0	0	7	0
	18	16200507	T	<*>	0	24	0	0	13	0	0	0		0	10	0	0	4	0	0	6	0	0	5	0	0	7	0
	18	16200508	T	C	0	24	0	0	13	0	0	0		0	10	0	0	4	0	0	6	0	0	5	0	0	6	0
	18	16200509	G	<*>	0	24	0	0	13	0	0	0		0	10	0	0	5	0	0	7	0	0	5	0	0	6	0
	18	16200510	C	<*>	0	24	0	0	13	0	0	0		0	10	0	0	5	0	0	7	0	0	5	0	0	6	0
	18	16200511	A	<*>	0	24	0	0	13	0	0	0		0	10	0	0	5	0	0	7	0	0	5	0	0	6	0
	18	16200512	G	<*>	0	25	0	0	13	0	0	0		0	10	0	0	5	0	0	7	0	0	5	0	0	6	0
	18	16200513	A	<*>	0	25	0	0	13	0	0	0		0	10	0	0	5	0	0	7	0	0	5	0	0	6	0
	18	16200514	C	<*>	0	25	0	0	13	0	0	0		0	10	0	0	5	0	0	7	0	0	5	0	0	6	0
	18	16200515	A	<*>	0	25	0	0	13	0	0	0		0	10	0	0	5	0	0	7	0	0	5	0	0	6	0
	18	16200516	G	<*>	0	24	0	0	13	0	0	0		0	10	0	0	5	0	0	7	0	0	5	0	0	7	0
	18	16200517	T	<*>	0	24	0	0	13	0	0	0		0	10	0	0	5	0	0	7	0	0	5	0	0	7	0
	18	16200518	C	<*>	0	24	0	0	13	0	0	0		0	10	0	0	5	0	0	7	0	0	5	0	0	7	0
	18	16200519	C	<*>	0	24	0	0	13	0	0	0		0	10	0	0	5	0	0	7	0	0	5	0	0	7	0
	18	16200520	T	<*>	0	25	0	0	13	0	0	0		0	10	0	0	5	0	0	7	0	0	5	0	0	7	0
	18	16200521	T	<*>	0	25	0	0	12	0	0	0		0	10	0	0	5	0	0	7	0	0	5	0	0	7	0
	18	16200522	C	<*>	0	25	0	0	12	0	0	0		0	10	0	0	5	0	0	7	0	0	5	0	0	7	0
	18	16200523	C	<*>	0	25	0	0	12	0	0	0		0	10	0	0	5	0	0	7	0	0	5	0	0	7	0
	18	16200524	A	<*>	0	25	0	0	12	0	0	0		0	9	0	0	5	0	0	5	0	0	5	0	0	7	0
	18	16200525	T	<*>	0	23	0	0	13	0	0	0		0	10	0	0	5	0	0	5	0	0	5	0	0	7	0
	18	16200526	A	<*>	0	24	0	0	13	0	0	0		0	10	0	0	5	0	0	5	0	0	5	0	0	6	0
	18	16200527	G	<*>	0	24	0	0	13	0	0	0		0	10	0	0	5	0	0	5	0	0	5	0	0	6	0
	18	16200528	A	<*>	0	22	0	0	13	0	0	0		0	10	0	0	5	0	0	5	0	0	5	0	0	6	0
	18	16200529	C	<*>	0	21	0	0	13	0	0	0		0	10	0	0	5	0	0	5	0	0	5	0	0	6	0
	18	16200530	T	<*>	0	20	0	0	14	0	0	0		0	10	0	0	6	0	0	5	0	0	5	0	0	6	0
	18	16200531	T	<*>	0	20	0	0	14	0	0	0		0	9	0	0	6	0	0	5	0	0	5	0	0	5	0
	18	16200532	A	<*>	0	20	0	0	13	0	0	0		0	9	0	0	6	0	0	5	0	0	4	0	0	5	0
	18	16200533	T	<*>	0	20	0	0	12	0	0	0		0	9	0	0	6	0	0	5	0	0	4	0	0	5	0
	18	16200534	T	<*>	0	20	0	0	12	0	0	0		0	9	0	0	6	0	0	5	0	0	4	0	0	6	0
	18	16200535	T	<*>	0	20	0	0	14	0	0	0		0	9	0	0	6	0	0	5	0	0	4	0	0	6	0
	18	16200536	T	<*>	0	19	0	0	13	0	0	0		0	9	0	0	6	0	0	5	0	0	4	0	0	6	0
	18	16200537	T	<*>	0	19	0	0	13	0	0	0		0	8	0	0	6	0	0	5	0	0	4	0	0	6	0
	18	16200538	G	A	0	19	0	0	13	0	0	0		0	8	0	0	6	0	0	5	0	0	4	0	0	6	0
	18	16200539	T	<*>	0	19	0	0	13	0	0	0		0	9	0	0	5	0	0	4	0	0	4	0	0	6	0
	18	16200540	T	<*>	0	18	0	0	13	0	0	0		0	9	0	0	5	0	0	3	0	0	4	0	0	6	0
	18	16200541	C	<*>	0	19	0	0	13	0	0	0		0	9	0	0	5	0	0	3	0	0	4	0	0	5	0
	18	16200542	C	<*>	0	19	0	0	13	0	0	0		0	10	0	0	5	0	0	3	0	0	4	0	0	5	0
	18	16200543	A	<*>	0	19	0	0	13	0	0	0		0	10	0	0	5	0	0	3	0	0	4	0	0	5	0
	18	16200544	A	<*>	0	19	0	0	13	0	0	0		0	10	0	0	5	0	0	3	0	0	4	0	0	5	0
	18	16200545	A	<*>	0	20	0	0	13	0	0	0		0	10	0	0	5	0	0	3	0	0	4	0	0	5	0
	18	16200546	A	<*>	0	20	0	0	14	0	0	0		0	10	0	0	5	0	0	3	0	0	4	0	0	5	0
	18	16200547	T	<*>	0	20	0	0	14	0	0	0		0	10	0	0	5	0	0	3	0	0	4	0	0	5	0
	18	16200548	T	<*>	0	20	0	0	14	0	0	0		0	10	0	0	5	0	0	3	0	0	4	0	0	5	0
	18	16200549	G	<*>	0	20	0	0	13	0	0	0		0	10	0	0	5	0	0	3	0	0	4	0	0	5	0
	18	16200550	G	A	15	6	0.714286	3	10	0.230769	0	0		0	10	0	1	4	0.2	2	1	0.666667	2	2	0.5	1	1	0.5
	18	16200551	A	<*>	0	21	0	0	13	0	0	0		0	10	0	0	4	0	0	3	0	0	4	0	0	2	0
	18	16200552	T	<*>	0	21	0	0	13	0	0	0		0	10	0	0	4	0	0	3	0	0	3	0	0	2	0
	18	16200553	A	<*>	0	21	0	0	13	0	0	0		0	10	0	0	4	0	0	2	0	0	3	0	0	2	0
	18	16200554	T	<*>	0	21	0	0	13	0	0	0		0	10	0	0	4	0	0	2	0	0	3	0	0	2	0
	18	16200555	C	<*>	0	20	0	0	13	0	0	0		0	0		0	0		0	0		0	0		0	0
	18	16200556	T	<*>	0	19	0	0	13	0	0	0		0	0		0	0		0	0		0	0		0	0
	18	16200557	G	<*>	0	19	0	0	12	0	0	0		0	0		0	0		0	0		0	0		0	0
	18	16200558	A	<*>	0	20	0	0	12	0	0	0		0	0		0	0		0	0		0	0		0	0
	18	16200559	A	<*>	0	21	0	0	12	0	0	0		0	0		0	0		0	0		0	0		0	0
	18	16200560	G	<*>	0	21	0	0	12	0	0	0		0	0		0	0		0	0		0	0		0	0
	18	16200561	A	<*>	0	21	0	0	12	0	0	0		0	0		0	0		0	0		0	0		0	0
	18	16200562	G	<*>	0	21	0	0	12	0	0	0		0	0		0	0		0	0		0	0		0	0
	18	16200563	G	GAA	0	5	0	0	10	0	0	0		0	0		0	0		0	0		0	0		0	0
	18	16200568	AAA	TTT	0	5	0	0	10	0	0	0		0	0		0	0		0	0		0	0		0	0
	18	16200569	AA	TT	0	5	0	0	10	0	0	0		0	0		0	0		0	0		0	0		0	0
	18	16200570	A	T	15	5	0.75	0	10	0	0	0		0	0		0	0		0	0		0	0		0	0
	18	16200577	A	<*>	0	21	0	0	12	0	0	0		0	0		0	0		0	0		0	0		0	0
	18	16200578	A	<*>	0	21	0	0	12	0	0	0		0	0		0	0		0	0		0	0		0	0
	18	16200579	G	<*>	0	21	0	0	12	0	0	0		0	0		0	0		0	0		0	0		0	0
	18	16200580	A	<*>	0	21	0	0	11	0	0	0		0	0		0	0		0	0		0	0		0	0
	18	16200581	A	<*>	0	21	0	0	11	0	0	0		0	0		0	0		0	0		0	0		0	0
	18	16200582	C	<*>	0	21	0	0	11	0	0	0		0	0		0	0		0	0		0	0		0	0
	18	16200583	T	<*>	0	21	0	0	11	0	0	0		0	0		0	0		0	0		0	0		0	0
	18	16200584	T	<*>	0	21	0	0	11	0	0	0		0	0		0	0		0	0		0	0		0	0
	18	16200585	C	<*>	0	21	0	0	10	0	0	0		0	0		0	0		0	0		0	0		0	0
	18	16200586	A	<*>	0	22	0	0	10	0	0	0		0	0		0	0		0	0		0	0		0	0
	18	16200587	T	<*>	0	22	0	0	10	0	0	0		0	0		0	0		0	0		0	0		0	0
	18	16200588	A	<*>	0	22	0	0	10	0	0	0		0	0		0	0		0	0		0	0		0	0
	18	16200589	T	<*>	0	22	0	0	10	0	0	0		0	0		0	0		0	0		0	0		0	0
	18	16200590	A	<*>	0	22	0	0	10	0	0	0		0	0		0	0		0	0		0	0		0	0
	18	16200591	C	<*>	0	22	0	0	10	0	0	0		0	0		0	0		0	0		0	0		0	0
	18	16200592	A	<*>	0	22	0	0	10	0	0	0		0	0		0	0		0	0		0	0		0	0
	18	16200593	T	<*>	0	20	0	0	10	0	0	0		0	0		0	0		0	0		0	0		0	0
	18	16200594	C	<*>	0	20	0	0	10	0	0	0		0	0		0	0		0	0		0	0		0	0
	18	16200595	T	<*>	0	21	0	0	10	0	0	0		0	0		0	0		0	0		0	0		0	0
	18	16200596	C	<*>	0	21	0	0	10	0	0	0		0	0		0	0		0	0		0	0		0	0
	18	16200597	A	<*>	0	21	0	0	10	0	0	0		0	0		0	0		0	0		0	0		0	0
	18	16200598	T	<*>	0	21	0	0	10	0	0	0		0	0		0	0		0	0		0	0		0	0
	18	16200599	A	<*>	0	21	0	0	10	0	0	0		0	0		0	0		0	0		0	0		0	0
	18	16200600	A	G	0	21	0	0	10	0	0	0		0	0		0	0		0	0		0	0		0	0
	18	16200601	A	<*>	0	22	0	0	10	0	0	0		0	0		0	0		0	0		0	0		0	0
	18	16200602	A	<*>	0	22	0	0	11	0	0	0		0	0		0	0		0	0		0	0		0	0
	18	16200603	G	<*>	0	22	0	0	11	0	0	0		0	0		0	0		0	0		0	0		0	0
	18	16200604	G	<*>	0	21	0	0	11	0	0	0		0	0		0	0		0	0		0	0		0	0
	18	16200605	C	<*>	0	21	0	0	11	0	0	0		0	0		0	0		0	0		0	0		0	0
	18	16200606	A	<*>	0	21	0	0	11	0	0	0		0	0		0	0		0	0		0	0		0	0
	18	16200607	T	<*>	0	21	0	0	11	0	0	0		0	0		0	0		0	0		0	0		0	0
	18	16200608	C	<*>	0	22	0	0	11	0	0	0		0	0		0	0		0	0		0	0		0	0
	18	16200609	A	<*>	0	22	0	0	11	0	0	0		0	0		0	0		0	0		0	0		0	0
	18	16200611	C	<*>	0	21	0	0	11	0	0	0		0	0		0	0		0	0		0	0		0	0
	18	16200612	G	<*>	0	20	0	0	11	0	0	0		0	0		0	0		0	0		0	0		0	0
	18	16200613	G	<*>	0	20	0	0	11	0	0	0		0	0		0	0		0	0		0	0		0	0
	18	16200614	A	<*>	0	19	0	0	11	0	0	0		0	0		0	0		0	0		0	0		0	0
	18	16200615	C	A	11	0	1	10	0	1	0	0		0	0		0	0		0	0		0	0		0	0
	18	16200615	CAGA	AAGG	8	0	1	0	0		0	0		0	0		0	0		0	0		0	0		0	0
	18	16200619	G	<*>	0	20	0	0	11	0	0	0		0	0		0	0		0	0		0	0		0	0
	18	16200620	C	<*>	0	20	0	0	11	0	0	0		0	0		0	0		0	0		0	0		0	0
	18	16200621	A	T	12	8	0.6	11	0	1	0	0		0	0		0	0		0	0		0	0		0	0
	18	16200622	A	<*>	0	20	0	0	11	0	0	0		0	0		0	0		0	0		0	0		0	0
	18	16200623	AT	A	8	9	0.470588	0	11	0	0	0		0	0		0	0		0	0		0	0		0	0
	18	16200624	TC	T	0	9	0	0	11	0	0	0		0	0		0	0		0	0		0	0		0	0
	18	16200629	A	<*>	0	21	0	0	11	0	0	0		0	0		0	0		0	0		0	0		0	0
	18	16200630	G	<*>	0	21	0	0	12	0	0	0		0	0		0	0		0	0		0	0		0	0
	18	16200631	T	<*>	0	21	0	0	12	0	0	0		0	0		0	0		0	0		0	0		0	0
	18	16200632	T	<*>	0	21	0	0	12	0	0	0		0	0		0	0		0	0		0	0		0	0
	18	16200633	A	<*>	0	22	0	0	12	0	0	0		0	0		0	0		0	0		0	0		0	0
	18	16200634	A	<*>	0	22	0	0	12	0	0	0		0	0		0	0		0	0		0	0		0	0
	18	16200635	A	<*>	0	22	0	0	12	0	0	0		0	0		0	0		0	0		0	0		0	0
	18	16200636	T	<*>	0	22	0	0	12	0	0	0		0	0		0	0		0	0		0	0		0	0
	18	16200637	A	<*>	0	21	0	0	12	0	0	0		0	0		0	0		0	0		0	0		0	0
	18	16200638	G	<*>	0	21	0	0	12	0	0	0		0	0		0	0		0	0		0	0		0	0
	18	16200639	A	<*>	0	21	0	0	12	0	0	0		0	0		0	0		0	0		0	0		0	0
	18	16200640	A	<*>	0	22	0	0	12	0	0	0		0	0		0	0		0	0		0	0		0	0
	18	16200641	C	<*>	0	22	0	0	12	0	0	0		0	0		0	0		0	0		0	0		0	0
	18	16200642	T	<*>	0	22	0	0	12	0	0	0		0	0		0	0		0	0		0	0		0	0
	18	16200643	T	<*>	0	23	0	0	14	0	0	0		0	0		0	0		0	0		0	0		0	0
	18	16200644	T	<*>	0	23	0	0	14	0	0	0		0	0		0	0		0	0		0	0		0	0
	18	16200645	A	<*>	0	23	0	0	14	0	0	0		0	0		0	0		0	0		0	0		0	0
	18	16200646	T	<*>	0	24	0	0	15	0	0	0		0	0		0	0		0	0		0	0		0	0
	18	16200647	T	<*>	0	24	0	0	15	0	0	0		0	0		0	0		0	0		0	0		0	0
	18	16200648	A	<*>	0	25	0	0	15	0	0	0		0	0		0	0		0	0		0	0		0	0
	18	16200649	T	<*>	0	26	0	0	14	0	0	0		0	0		0	0		0	0		0	0		0	0
	18	16200650	T	<*>	0	25	0	0	14	0	0	0		0	0		0	0		0	0		0	0		0	0
	18	16200651	G	<*>	0	24	0	0	14	0	0	0		0	0		0	0		0	0		0	0		0	0
	18	16200652	T	<*>	0	24	0	0	15	0	0	0		0	0		0	0		0	0		0	0		0	0
	18	16200653	A	<*>	0	24	0	0	15	0	0	0		0	0		0	0		0	0		0	0		0	0
	18	16200654	G	<*>	0	24	0	0	14	0	0	0		0	0		0	0		0	0		0	0		0	0
	18	16200655	T	<*>	0	25	0	0	14	0	0	0		0	0		0	0		0	0		0	0		0	0
	18	16200656	G	<*>	0	25	0	0	14	0	0	0		0	0		0	0		0	0		0	0		0	0
	18	16200657	G	<*>	0	26	0	0	14	0	0	0		0	0		0	0		0	0		0	0		0	0
	18	16200658	G	<*>	0	26	0	0	14	0	0	0		0	0		0	0		0	0		0	0		0	0
	18	16200659	A	<*>	0	26	0	0	13	0	0	0		0	0		0	0		0	0		0	0		0	0
	18	16200660	C	T	0	26	0	6	6	0.5	0	0		0	0		0	0		0	0		0	0		0	0
	18	16200661	G	<*>	0	26	0	0	12	0	0	0		0	0		0	0		0	0		0	0		0	0
	18	16200662	T	C	0	27	0	0	12	0	0	0		0	0		0	0		0	0		0	0		0	0
	18	16200663	A	<*>	0	27	0	0	12	0	0	0		0	0		0	0		0	0		0	0		0	0
	18	16200664	A	<*>	0	27	0	0	12	0	0	0		0	0		0	0		0	0		0	0		0	0
	18	16200665	T	<*>	0	27	0	0	12	0	0	0		0	0		0	0		0	0		0	0		0	0
	18	16200666	T	<*>	0	26	0	0	12	0	0	0		0	0		0	0		0	0		0	0		0	0
	18	16200667	C	<*>	0	26	0	0	12	0	0	0		0	0		0	0		0	0		0	0		0	0
	18	16200668	A	<*>	0	26	0	0	12	0	0	0		0	0		0	0		0	0		0	0		0	0
	18	16200669	C	<*>	0	25	0	0	12	0	0	0		0	0		0	0		0	0		0	0		0	0
	18	16200670	C	<*>	0	25	0	0	13	0	0	0		0	10	0	0	4	0	0	2	0	0	3	0	0	4	0
	18	16200671	A	<*>	0	26	0	0	12	0	0	0		0	10	0	0	4	0	0	2	0	0	3	0	0	4	0
	18	16200672	T	<*>	0	25	0	0	12	0	0	0		0	10	0	0	4	0	0	2	0	0	3	0	0	4	0
	18	16200673	T	<*>	0	25	0	0	12	0	0	0		0	10	0	0	4	0	0	2	0	0	3	0	0	4	0
	18	16200674	C	<*>	0	25	0	0	12	0	0	0		0	10	0	0	4	0	0	4	0	0	3	0	0	5	0
	18	16200675	T	<*>	0	25	0	0	12	0	0	0		0	10	0	0	4	0	0	4	0	0	3	0	0	5	0
	18	16200676	T	<*>	0	25	0	0	12	0	0	0		0	10	0	0	4	0	0	4	0	0	3	0	0	5	0
	18	16200677	G	<*>	0	25	0	0	12	0	0	0		0	10	0	0	4	0	0	4	0	0	3	0	0	6	0
	18	16200678	A	<*>	0	25	0	0	12	0	0	0		0	10	0	0	4	0	0	4	0	0	3	0	0	6	0
	18	16200679	A	<*>	0	25	0	0	12	0	0	0		0	10	0	0	4	0	0	4	0	0	3	0	0	6	0
	18	16200680	T	<*>	0	24	0	0	12	0	0	0		0	10	0	0	4	0	0	4	0	0	3	0	0	6	0
	18	16200681	G	<*>	0	24	0	0	12	0	0	1	0	0	10	0	0	4	0	0	4	0	0	3	0	0	6	0
	18	16200682	C	<*>	0	25	0	0	13	0	0	1	0	0	10	0	0	4	0	0	4	0	0	4	0	0	7	0
	18	16200683	C	<*>	0	25	0	0	14	0	0	2	0	0	10	0	0	4	0	0	5	0	0	7	0	0	7	0
	18	16200684	A	<*>	0	25	0	0	14	0	0	2	0	0	10	0	0	4	0	0	5	0	0	7	0	0	7	0
	18	16200685	G	<*>	0	25	0	0	15	0	0	2	0	0	10	0	0	4	0	0	5	0	0	7	0	0	7	0
	18	16200686	G	<*>	0	25	0	0	16	0	0	2	0	0	10	0	0	4	0	0	5	0	0	7	0	0	7	0
	18	16200687	A	<*>	0	25	0	0	16	0	0	2	0	0	10	0	0	4	0	0	5	0	0	7	0	0	7	0
	18	16200688	A	<*>	0	25	0	0	16	0	0	2	0	0	10	0	0	4	0	0	5	0	0	8	0	0	7	0
	18	16200689	G	<*>	0	26	0	0	16	0	0	2	0	0	10	0	0	4	0	0	5	0	0	8	0	0	7	0
	18	16200690	T	<*>	0	26	0	0	16	0	0	2	0	0	9	0	0	4	0	0	5	0	0	7	0	0	7	0
	18	16200691	C	<*>	0	26	0	0	16	0	0	2	0	0	9	0	0	4	0	0	5	0	0	7	0	0	7	0
	18	16200692	A	<*>	0	26	0	0	16	0	0	2	0	0	9	0	0	4	0	0	5	0	0	7	0	0	7	0
	18	16200693	A	<*>	0	26	0	0	17	0	0	2	0	0	8	0	0	4	0	0	5	0	0	6	0	0	7	0
	18	16200694	A	<*>	0	27	0	0	17	0	0	2	0	0	8	0	0	3	0	0	5	0	0	6	0	0	7	0
	18	16200695	C	G	0	27	0	0	17	0	0	2	0	0	8	0	0	3	0	0	6	0	0	6	0	0	7	0
	18	16200696	A	<*>	0	27	0	0	16	0	0	2	0	0	8	0	0	3	0	0	6	0	0	6	0	0	7	0
	18	16200697	C	<*>	0	26	0	0	16	0	0	2	0	0	8	0	0	3	0	0	6	0	0	6	0	0	7	0
	18	16200698	T	<*>	0	26	0	0	16	0	0	2	0	0	8	0	0	3	0	0	6	0	0	6	0	0	7	0
	18	16200699	G	<*>	0	26	0	0	16	0	0	2	0	0	5	0	0	3	0	0	6	0	0	6	0	0	7	0
	18	16200700	A	<*>	0	27	0	0	16	0	0	2	0	0	4	0	0	2	0	0	6	0	0	6	0	0	7	0
	18	16200701	A	<*>	0	27	0	0	15	0	0	2	0	0	4	0	0	2	0	0	6	0	0	6	0	0	7	0
	18	16200702	T	<*>	0	27	0	0	15	0	0	2	0	0	4	0	0	2	0	0	6	0	0	6	0	0	7	0
	18	16200703	G	<*>	0	27	0	0	15	0	0	2	0	0	4	0	0	2	0	0	8	0	0	6	0	0	7	0
	18	16200704	A	<*>	0	26	0	0	15	0	0	2	0	0	4	0	0	2	0	0	8	0	0	6	0	0	7	0
	18	16200705	A	<*>	0	26	0	0	15	0	0	2	0	0	4	0	0	2	0	0	8	0	0	7	0	0	7	0
	18	16200706	G	<*>	0	26	0	0	15	0	0	2	0	0	4	0	0	3	0	0	7	0	0	6	0	0	8	0
	18	16200707	C	<*>	0	26	0	0	15	0	0	3	0	0	4	0	0	3	0	0	7	0	0	6	0	0	8	0
	18	16200708	A	<*>	0	28	0	0	14	0	0	3	0	0	3	0	0	4	0	0	7	0	0	7	0	0	8	0
	18	16200709	T	<*>	0	28	0	0	14	0	0	3	0	0	3	0	0	4	0	0	7	0	0	7	0	0	8	0
	18	16200710	T	<*>	0	29	0	0	14	0	0	3	0	0	3	0	0	3	0	0	7	0	0	7	0	0	8	0
	18	16200711	G	<*>	0	28	0	0	14	0	0	3	0	0	3	0	0	3	0	0	7	0	0	7	0	0	8	0
	18	16200712	A	<*>	0	28	0	0	14	0	0	3	0	0	3	0	0	3	0	0	7	0	0	7	0	0	8	0
	18	16200713	A	<*>	0	29	0	0	14	0	0	3	0	0	3	0	0	3	0	0	7	0	0	7	0	0	8	0
	18	16200714	A	<*>	0	29	0	0	14	0	0	3	0	0	3	0	0	3	0	0	7	0	0	7	0	0	8	0
	18	16200715	C	<*>	0	30	0	0	14	0	0	3	0	0	3	0	0	3	0	0	8	0	0	7	0	0	10	0
	18	16200717	A	<*>	0	30	0	0	14	0	0	3	0	0	3	0	0	3	0	0	8	0	0	7	0	0	9	0
	18	16200718	C	<*>	0	30	0	0	14	0	0	3	0	0	3	0	0	3	0	0	8	0	0	7	0	0	8	0
	18	16200719	C	<*>	0	30	0	0	15	0	0	3	0	0	5	0	0	3	0	0	8	0	0	7	0	0	9	0
	18	16200720	A	<*>	0	29	0	0	15	0	0	3	0	0	5	0	0	4	0	0	8	0	0	7	0	0	9	0
	18	16200721	T	<*>	0	28	0	0	15	0	0	3	0	0	5	0	0	4	0	0	8	0	0	7	0	0	9	0
	18	16200722	TGTG	<*>	0	27	0	0	15	0	1	2	0.333333	0	5	0	0	4	0	1	7	0.125	2	5	0.285714	0	8	0
	18	16200726	A	<*>	0	28	0	0	15	0	0	3	0	0	6	0	0	4	0	0	8	0	0	9	0	0	9	0
	18	16200727	T	<*>	0	28	0	0	14	0	0	3	0	0	6	0	0	4	0	0	8	0	0	9	0	0	9	0
	18	16200728	C	<*>	0	28	0	0	15	0	0	3	0	0	6	0	0	4	0	0	8	0	0	11	0	0	10	0
	18	16200729	A	<*>	0	28	0	0	15	0	0	3	0	0	7	0	0	4	0	0	10	0	0	12	0	0	10	0
	18	16200730	C	<*>	0	28	0	0	16	0	0	3	0	0	7	0	0	5	0	0	12	0	0	14	0	0	10	0
	18	16200731	C	<*>	0	28	0	0	16	0	0	3	0	0	7	0	0	5	0	0	12	0	0	16	0	0	10	0
	18	16200732	A	<*>	0	28	0	0	16	0	0	3	0	0	7	0	0	6	0	0	12	0	0	16	0	0	10	0
	18	16200733	G	<*>	0	28	0	0	16	0	0	3	0	0	8	0	0	6	0	0	12	0	0	16	0	0	10	0
	18	16200734	G	<*>	0	28	0	0	16	0	0	3	0	0	8	0	0	6	0	0	12	0	0	16	0	0	9	0
	18	16200735	A	<*>	0	28	0	0	16	0	0	3	0	0	8	0	0	6	0	0	12	0	0	16	0	0	7	0
	18	16200736	G	<*>	0	28	0	0	16	0	0	3	0	0	8	0	0	7	0	0	13	0	0	17	0	0	7	0
	18	16200737	G	<*>	0	28	0	0	15	0	0	4	0	0	8	0	0	7	0	0	14	0	0	17	0	0	7	0
	18	16200738	T	<*>	0	26	0	0	15	0	0	4	0	0	8	0	0	7	0	0	14	0	0	17	0	0	10	0
	18	16200739	A	<*>	0	27	0	0	15	0	0	4	0	0	8	0	0	8	0	0	14	0	0	17	0	0	10	0
	18	16200740	A	<*>	0	27	0	0	14	0	0	4	0	0	7	0	0	8	0	0	14	0	0	17	0	0	10	0
	18	16200741	G	<*>	0	27	0	0	14	0	0	6	0	0	7	0	0	8	0	0	14	0	0	19	0	0	10	0
	18	16200742	G	<*>	0	27	0	0	14	0	0	6	0	0	7	0	0	8	0	0	14	0	0	19	0	0	10	0
	18	16200743	A	<*>	0	26	0	0	14	0	0	6	0	0	6	0	0	8	0	0	15	0	0	19	0	0	10	0
	18	16200744	T	<*>	0	26	0	0	14	0	0	6	0	0	6	0	0	8	0	0	15	0	0	20	0	0	11	0
	18	16200745	T	<*>	0	26	0	0	14	0	0	7	0	0	6	0	0	8	0	0	15	0	0	20	0	0	11	0
	18	16200746	T	<*>	0	27	0	0	14	0	0	7	0	0	6	0	0	8	0	0	14	0	0	20	0	0	11	0
	18	16200747	C	<*>	0	27	0	0	14	0	0	7	0	0	6	0	0	8	0	0	15	0	0	20	0	0	11	0
	18	16200748	C	<*>	0	27	0	0	14	0	0	7	0	0	6	0	0	8	0	0	15	0	0	21	0	0	13	0
	18	16200749	T	<*>	0	26	0	0	14	0	0	7	0	0	6	0	0	8	0	0	15	0	0	22	0	0	13	0
	18	16200750	T	<*>	0	26	0	0	14	0	0	7	0	0	6	0	0	8	0	0	15	0	0	23	0	0	15	0
	18	16200751	C	<*>	0	26	0	0	14	0	0	7	0	0	6	0	0	8	0	0	15	0	0	23	0	0	15	0
	18	16200752	C	<*>	0	26	0	0	14	0	0	7	0	0	6	0	0	8	0	0	15	0	0	23	0	0	15	0
	18	16200753	A	<*>	0	26	0	0	14	0	0	7	0	0	6	0	0	8	0	0	15	0	0	23	0	0	15	0
	18	16200754	A	<*>	0	26	0	0	14	0	0	7	0	0	6	0	0	8	0	0	14	0	0	23	0	0	15	0
	18	16200755	G	<*>	0	25	0	0	13	0	0	7	0	0	6	0	0	8	0	0	15	0	0	23	0	0	15	0
	18	16200756	A	<*>	0	25	0	0	13	0	0	7	0	0	6	0	0	8	0	0	15	0	0	23	0	0	15	0
	18	16200758	C	<*>	0	25	0	0	13	0	0	7	0	0	6	0	0	8	0	0	15	0	0	23	0	0	15	0
	18	16200759	A	<*>	2	23	0.08	0	13	0	0	7	0	0	6	0	0	8	0	0	15	0	2	21	0.0869565	3	11	0.214286
	18	16200762	C	<*>	0	25	0	0	13	0	0	7	0	0	6	0	0	8	0	0	13	0	0	23	0	0	12	0
	18	16200763	T	<*>	0	26	0	0	13	0	0	7	0	0	6	0	0	8	0	0	13	0	0	23	0	0	11	0
	18	16200764	C	<*>	0	25	0	0	13	0	0	2	0	0	0		0	0		0	2	0	0	5	0	0	1	0
	18	16200765	T	<*>	0	25	0	0	13	0	0	2	0	0	0		0	0		0	2	0	0	5	0	0	1	0
	18	16200766	A	T	0	24	0	0	12	0	1	0	1	0	0		0	0		2	0	1	3	0	1	0	0
	18	16200768	A	<*>	0	24	0	0	12	0	0	1	0	0	0		0	0		0	2	0	0	3	0	0	0
	18	16200769	A	<*>	0	24	0	0	12	0	0	0		0	0		0	0		0	0		0	0		0	0
	18	16200770	A	<*>	0	25	0	0	11	0	0	0		0	0		0	0		0	0		0	0		0	0
	18	16200771	A	<*>	0	23	0	0	10	0	0	0		0	0		0	0		0	0		0	0		0	0
	18	16200772	A	<*>	0	23	0	0	10	0	0	0		0	0		0	0		0	0		0	0		0	0
	18	16200773	T	<*>	0	22	0	0	10	0	0	0		0	0		0	0		0	0		0	0		0	0
	18	16200774	TATCAATTA	T	0	21	0	0	9	0	0	0		0	0		0	0		0	0		0	0		0	0
	18	16200784	T	<*>	0	24	0	0	11	0	0	0		0	0		0	0		0	0		0	0		0	0
	18	16200785	C	<*>	0	24	0	0	11	0	0	0		0	0		0	0		0	0		0	0		0	0
	18	16200786	A	<*>	0	23	0	0	12	0	0	0		0	0		0	0		0	0		0	0		0	0
	18	16200787	A	<*>	0	24	0	0	13	0	0	0		0	0		0	0		0	0		0	0		0	0
	18	16200788	T	<*>	0	24	0	0	13	0	0	0		0	0		0	0		0	0		0	0		0	0
	18	16200789	A	<*>	0	24	0	0	13	0	0	0		0	0		0	0		0	0		0	0		0	0
	18	16200790	C	<*>	0	25	0	0	13	0	0	0		0	0		0	0		0	0		0	0		0	0
	18	16200791	A	<*>	0	25	0	0	13	0	0	0		0	0		0	0		0	0		0	0		0	0
	18	16200792	T	<*>	0	25	0	0	13	0	0	0		0	0		0	0		0	0		0	0		0	0
	18	16200793	G	<*>	0	25	0	0	13	0	0	0		0	0		0	0		0	0		0	0		0	0
	18	16200794	G	<*>	0	24	0	0	13	0	0	0		0	0		0	0		0	0		0	0		0	0
	18	16200795	A	<*>	0	24	0	0	13	0	0	0		0	0		0	0		0	0		0	0		0	0
	18	16200796	A	<*>	0	24	0	0	13	0	0	0		0	0		0	0		0	0		0	0		0	0
	18	16200797	A	<*>	0	24	0	0	13	0	0	0		0	0		0	0		0	0		0	0		0	0
	18	16200798	A	<*>	0	23	0	0	13	0	0	0		0	0		0	0		0	0		0	0		0	0
	18	16200799	C	<*>	0	23	0	0	13	0	0	0		0	0		0	0		0	0		0	0		0	0
	18	16200800	T	<*>	0	23	0	0	13	0	0	0		0	0		0	0		0	0		0	0		0	0
	18	16200801	G	<*>	0	24	0	0	13	0	0	0		0	0		0	0		0	0		0	0		0	0
	18	16200802	A	<*>	0	24	0	0	13	0	0	0		0	0		0	0		0	0		0	0		0	0
	18	16200803	G	<*>	0	25	0	0	13	0	0	0		0	0		0	0		0	0		0	0		0	0
	18	16200804	G	<*>	0	25	0	0	13	0	0	0		0	0		0	0		0	0		0	0		0	0
	18	16200805	A	<*>	0	24	0	0	13	0	0	0		0	0		0	0		0	0		0	0		0	0
	18	16200806	A	<*>	0	24	0	0	13	0	0	0		0	0		0	0		0	0		0	0		0	0
	18	16200807	A	<*>	0	23	0	0	12	0	0	0		0	0		0	0		0	0		0	0		0	0
	18	16200808	C	<*>	0	23	0	0	11	0	0	0		0	0		0	0		0	0		0	0		0	0
	18	16200809	A	<*>	0	23	0	0	11	0	0	0		0	0		0	0		0	0		0	0		0	0
	18	16200810	C	<*>	0	23	0	0	10	0	0	0		0	0		0	0		0	0		0	0		0	0
	18	16200811	A	<*>	0	22	0	0	10	0	0	0		0	0		0	0		0	0		0	0		0	0
	18	16200812	C	<*>	0	22	0	0	10	0	0	0		0	0		0	0		0	0		0	0		0	0
	18	16200813	G	A	0	13	0	6	0	1	0	0		0	0		0	0		0	0		0	0		0	0
	18	16200813	GA	AT	8	13	0.380952	4	0	1	0	0		0	0		0	0		0	0		0	0		0	0
	18	16200815	T	<*>	0	21	0	0	11	0	0	0		0	0		0	0		0	0		0	0		0	0
	18	16200816	T	<*>	0	22	0	0	11	0	0	0		0	0		0	0		0	0		0	0		0	0
	18	16200817	T	<*>	0	22	0	0	11	0	0	0		0	0		0	0		0	0		0	0		0	0
	18	16200818	T	<*>	0	22	0	0	11	0	0	0		0	0		0	0		0	0		0	0		0	0
	18	16200819	T	<*>	0	22	0	0	11	0	0	0		0	0		0	0		0	0		0	0		0	0
	18	16200820	C	<*>	0	22	0	0	11	0	0	0		0	0		0	0		0	0		0	0		0	0
	18	16200821	T	<*>	0	22	0	0	11	0	0	0		0	0		0	0		0	0		0	0		0	0
	18	16200822	A	<*>	0	23	0	0	12	0	0	0		0	0		0	0		0	0		0	0		0	0
	18	16200823	A	<*>	0	23	0	0	12	0	0	0		0	0		0	0		0	0		0	0		0	0
	18	16200824	CT	C	0	22	0	0	12	0	0	0		0	0		0	0		0	0		0	0		0	0
	18	16200830	C	<*>	0	22	0	0	13	0	0	0		0	0		0	0		0	0		0	0		0	0
	18	16200831	A	<*>	0	23	0	0	13	0	0	0		0	0		0	0		0	0		0	0		0	0
	18	16200832	T	<*>	0	23	0	0	13	0	0	0		0	0		0	0		0	0		0	0		0	0
	18	16200833	T	<*>	0	21	0	0	14	0	0	0		0	0		0	0		0	0		0	0		0	0
	18	16200834	G	<*>	0	23	0	0	15	0	0	0		0	0		0	0		0	0		0	0		0	0
	18	16200835	G	<*>	0	23	0	0	16	0	0	0		0	0		0	0		0	0		0	0		0	0
	18	16200836	C	<*>	0	23	0	0	16	0	0	0		0	0		0	0		0	0		0	0		0	0
	18	16200837	T	<*>	0	23	0	0	16	0	0	0		0	0		0	0		0	0		0	0		0	0
	18	16200838	T	<*>	0	22	0	0	16	0	0	0		0	0		0	0		0	0		0	0		0	0
	18	16200839	T	<*>	0	21	0	0	16	0	0	0		0	0		0	0		0	0		0	0		0	0
	18	16200840	A	<*>	0	23	0	0	16	0	0	0		0	0		0	0		0	0		0	0		0	0
	18	16200841	A	<*>	0	23	0	0	16	0	0	0		0	0		0	0		0	0		0	0		0	0
	18	16200842	A	<*>	0	23	0	0	16	0	0	0		0	0		0	0		0	0		0	0		0	0
	18	16200843	A	<*>	0	23	0	0	17	0	0	0		0	0		0	0		0	0		0	0		0	0
	18	16200844	A	<*>	0	23	0	0	16	0	0	0		0	0		0	0		0	0		0	0		0	0
	18	16200845	G	<*>	0	23	0	0	16	0	0	0		0	0		0	0		0	0		0	0		0	0
	18	16200846	T	<*>	0	23	0	0	16	0	0	0		0	0		0	0		0	0		0	0		0	0
	18	16200847	A	<*>	0	23	0	0	16	0	0	0		0	0		0	0		0	0		0	0		0	0
	18	16200848	G	<*>	0	23	0	0	16	0	0	0		0	0		0	0		0	0		0	0		0	0
	18	16200849	C	G	9	14	0.391304	0	16	0	0	0		0	0		0	0		0	0		0	0		0	0
	18	16200850	A	<*>	0	23	0	0	16	0	0	0		0	0		0	0		0	0		0	0		0	0
	18	16200851	A	<*>	0	23	0	0	16	0	0	0		0	0		0	0		0	0		0	0		0	0
	18	16200852	G	<*>	0	24	0	0	15	0	0	0		0	0		0	0		0	0		0	0		0	0
	18	16200853	C	<*>	0	24	0	0	15	0	0	0		0	0		0	0		0	0		0	0		0	0
	18	16200854	A	<*>	0	24	0	0	14	0	0	0		0	0		0	0		0	0		0	0		0	0
	18	16200855	C	<*>	0	24	0	0	14	0	0	0		0	0		0	0		0	0		0	0		0	0
	18	16200856	A	<*>	0	24	0	0	14	0	0	0		0	0		0	0		0	0		0	0		0	0
	18	16200857	C	<*>	0	24	0	0	15	0	0	0		0	0		0	0		0	0		0	0		0	0
	18	16200858	A	<*>	0	24	0	0	15	0	0	0		0	0		0	0		0	0		0	0		0	0
	18	16200859	A	<*>	0	24	0	0	16	0	0	0		0	0		0	0		0	0		0	0		0	0
	18	16200860	A	<*>	0	25	0	0	17	0	0	0		0	0		0	0		0	0		0	0		0	0
	18	16200861	C	<*>	0	25	0	0	17	0	0	0		0	0		0	0		0	0		0	0		0	0
	18	16200862	A	<*>	0	25	0	0	17	0	0	0		0	0		0	0		0	0		0	0		0	0
	18	16200863	A	<*>	0	24	0	0	18	0	0	0		0	0		0	0		0	0		0	0		0	0
	18	16200864	A	<*>	0	24	0	0	18	0	0	0		0	0		0	0		0	0		0	0		0	0
	18	16200865	C	<*>	0	24	0	0	18	0	0	0		0	0		0	0		0	0		0	0		0	0
	18	16200866	A	<*>	0	24	0	0	18	0	0	0		0	0		0	0		0	0		0	0		0	0
	18	16200867	G	<*>	0	24	0	0	19	0	0	0		0	0		0	0		0	0		0	0		0	0
	18	16200868	A	<*>	0	24	0	0	19	0	0	0		0	0		0	0		0	0		0	0		0	0
	18	16200869	A	<*>	0	25	0	0	19	0	0	0		0	0		0	0		0	0		0	0		0	0
	18	16200870	G	<*>	0	25	0	0	19	0	0	0		0	0		0	0		0	0		0	0		0	0
	18	16200871	T	<*>	0	25	0	0	20	0	0	0		0	0		0	0		0	0		0	0		0	0
	18	16200872	T	<*>	0	25	0	0	20	0	0	0		0	0		0	0		0	0		0	0		0	0
	18	16200873	A	<*>	0	25	0	0	21	0	0	0		0	0		0	0		0	0		0	0		0	0
	18	16200874	A	<*>	0	25	0	0	21	0	0	0		0	0		0	0		0	0		0	0		0	0
	18	16200875	C	<*>	0	25	0	0	21	0	0	0		0	0		0	0		0	0		0	0		0	0
	18	16200876	T	<*>	0	25	0	0	21	0	0	0		0	0		0	0		0	0		0	0		0	0
	18	16200877	T	A	0	25	0	12	9	0.571429	0	0		0	0		0	0		0	0		0	0		0	0
	18	16200878	G	<*>	0	25	0	0	21	0	0	0		0	0		0	0		0	0		0	0		0	0
	18	16200879	C	<*>	0	25	0	0	21	0	0	0		0	0		0	0		0	0		0	0		0	0
	18	16200880	A	<*>	0	25	0	0	21	0	0	0		0	0		0	0		0	0		0	0		0	0
	18	16200881	A	<*>	0	25	0	0	21	0	0	0		0	0		0	0		0	0		0	0		0	0
	18	16200882	A	<*>	0	24	0	0	21	0	0	0		0	0		0	0		0	0		0	0		0	0
	18	16200883	C	<*>	0	24	0	0	21	0	0	0		0	0		0	0		0	0		0	0		0	0
	18	16200884	C	<*>	0	25	0	0	21	0	0	0		0	0		0	0		0	0		0	0		0	0
	18	16200885	T	<*>	0	25	0	0	21	0	0	0		0	0		0	0		0	0		0	0		0	0
	18	16200886	A	<*>	0	25	0	0	21	0	0	0		0	0		0	0		0	0		0	0		0	0
	18	16200887	G	<*>	0	24	0	0	21	0	0	0		0	0		0	0		0	0		0	0		0	0
	18	16200888	G	A	0	24	0	0	21	0	0	0		0	0		0	0		0	0		0	0		0	0
	18	16200889	A	<*>	0	24	0	0	21	0	0	0		0	0		0	0		0	0		0	0		0	0
	18	16200890	T	<*>	0	24	0	0	21	0	0	0		0	0		0	0		0	0		0	0		0	0
	18	16200891	C	<*>	0	26	0	0	21	0	0	0		0	0		0	0		0	0		0	0		0	0
	18	16200892	T	<*>	0	26	0	0	20	0	0	0		0	0		0	0		0	0		0	0		0	0
	18	16200893	A	<*>	0	26	0	0	21	0	0	0		0	0		0	0		0	0		0	0		0	0
	18	16200894	G	<*>	0	24	0	0	21	0	0	0		0	0		0	0		0	0		0	0		0	0
	18	16200895	C	<*>	0	24	0	0	22	0	0	0		0	0		0	0		0	0		0	0		0	0
	18	16200896	T	<*>	0	24	0	0	22	0	0	0		0	0		0	0		0	0		0	0		0	0
	18	16200897	T	<*>	0	24	0	0	22	0	0	0		0	0		0	0		0	0		0	0		0	0
	18	16200898	C	<*>	0	23	0	0	22	0	0	0		0	0		0	0		0	0		0	0		0	0
	18	16200899	A	<*>	0	23	0	0	22	0	0	0		0	0		0	0		0	0		0	0		0	0
	18	16200900	T	<*>	0	23	0	0	22	0	0	0		0	0		0	0		0	0		0	0		0	0
	18	16200901	G	<*>	0	23	0	0	24	0	0	0		0	0		0	0		0	0		0	0		0	0
	18	16200902	A	<*>	0	23	0	0	24	0	0	0		0	0		0	0		0	0		0	0		0	0
	18	16200903	A	<*>	0	23	0	0	23	0	0	0		0	0		0	0		0	0		0	0		0	0
	18	16200904	G	<*>	0	22	0	0	23	0	0	0		0	0		0	0		0	0		0	0		0	0
	18	16200905	C	<*>	0	22	0	0	22	0	0	0		0	0		0	0		0	0		0	0		0	0
	18	16200906	T	C	0	21	0	12	10	0.545455	0	0		0	0		0	0		0	0		0	0		0	0
	18	16200907	A	<*>	0	20	0	0	22	0	0	0		0	0		0	0		0	0		0	0		0	0
	18	16200908	T	<*>	0	20	0	0	22	0	0	0		0	0		0	0		0	0		0	0		0	0
	18	16200910	A	<*>	0	20	0	0	21	0	0	0		0	0		0	0		0	0		0	0		0	0
	18	16200911	T	<*>	0	18	0	0	19	0	0	0		0	0		0	0		0	0		0	0		0	0
	18	16200912	T	<*>	0	18	0	0	19	0	0	0		0	0		0	0		0	0		0	0		0	0
	18	16200913	A	<*>	0	18	0	0	19	0	0	0		0	0		0	0		0	0		0	0		0	0
	18	16200914	T	<*>	0	19	0	0	19	0	0	0		0	0		0	0		0	0		0	0		0	0
	18	16200915	A	<*>	0	20	0	0	19	0	0	0		0	0		0	0		0	0		0	0		0	0
	18	16200916	C	T	20	0	1	20	0	1	0	0		0	0		0	0		0	0		0	0		0	0
	18	16200917	G	<*>	0	20	0	0	20	0	0	0		0	0		0	0		0	0		0	0		0	0
	18	16200918	A	<*>	0	20	0	0	20	0	0	0		0	0		0	0		0	0		0	0		0	0
	18	16200919	T	<*>	0	20	0	0	20	0	0	0		0	0		0	0		0	0		0	0		0	0
	18	16200920	G	<*>	0	20	0	0	20	0	0	0		0	0		0	0		0	0		0	0		0	0
	18	16200921	T	<*>	0	20	0	0	20	0	0	0		0	0		0	0		0	0		0	0		0	0
	18	16200922	T	<*>	0	20	0	0	20	0	0	0		0	0		0	0		0	0		0	0		0	0
	18	16200923	C	<*>	0	20	0	0	20	0	0	0		0	0		0	0		0	0		0	0		0	0
	18	16200924	C	<*>	0	20	0	0	20	0	0	0		0	0		0	0		0	0		0	0		0	0
	18	16200925	A	<*>	0	19	0	0	19	0	0	0		0	0		0	0		0	0		0	0		0	0
	18	16200926	C	<*>	0	18	0	0	19	0	0	0		0	0		0	0		0	0		0	0		0	0
	18	16200927	T	<*>	0	17	0	0	19	0	0	0		0	0		0	0		0	0		0	0		0	0
	18	16200928	C	<*>	0	17	0	0	20	0	0	0		0	0		0	0		0	0		0	0		0	0
	18	16200929	A	<*>	0	17	0	0	20	0	0	0		0	0		0	0		0	0		0	0		0	0
	18	16200930	A	<*>	0	18	0	0	21	0	0	0		0	0		0	0		0	0		0	0		0	0
	18	16200931	T	<*>	0	18	0	0	21	0	0	0		0	0		0	0		0	0		0	0		0	0
	18	16200932	C	<*>	0	18	0	0	21	0	0	0		0	0		0	0		0	0		0	0		0	0
	18	16200933	A	<*>	0	18	0	0	21	0	0	0		0	0		0	0		0	0		0	0		0	0
	18	16200934	A	<*>	0	19	0	0	21	0	0	0		0	0		0	0		0	0		0	0		0	0
	18	16200935	A	<*>	0	19	0	0	21	0	0	0		0	0		0	0		0	0		0	0		0	0
	18	16200936	T	<*>	0	19	0	0	21	0	0	0		0	0		0	0		0	0		0	0		0	0
	18	16200937	T	<*>	0	19	0	0	23	0	0	0		0	0		0	0		0	0		0	0		0	0
	18	16200938	T	<*>	0	19	0	0	23	0	0	0		0	0		0	0		0	0		0	0		0	0
	18	16200939	A	<*>	0	19	0	0	21	0	0	0		0	0		0	0		0	0		0	0		0	0
	18	16200940	T	<*>	0	18	0	0	21	0	0	0		0	0		0	0		0	0		0	0		0	0
	18	16200941	T	<*>	0	18	0	0	21	0	0	0		0	0		0	0		0	0		0	0		0	0
	18	16200942	C	<*>	0	18	0	0	21	0	0	0		0	0		0	0		0	0		0	0		0	0
	18	16200943	T	<*>	0	17	0	0	20	0	0	0		0	0		0	0		0	0		0	0		0	0
	18	16200944	G	<*>	0	16	0	0	20	0	0	0		0	0		0	0		0	0		0	0		0	0
	18	16200945	A	<*>	0	16	0	0	20	0	0	0		0	0		0	0		0	0		0	0		0	0
	18	16200946	C	<*>	0	16	0	0	19	0	0	0		0	0		0	0		0	0		0	0		0	0
	18	16200947	A	<*>	0	16	0	0	19	0	0	0		0	0		0	0		0	0		0	0		0	0
	18	16200948	C	<*>	0	16	0	0	19	0	0	0		0	0		0	0		0	0		0	0		0	0
	18	16200949	A	<*>	0	16	0	0	19	0	0	0		0	0		0	0		0	0		0	0		0	0
	18	16200950	T	<*>	0	17	0	0	20	0	0	0		0	0		0	0		0	0		0	0		0	0
	18	16200951	T	<*>	0	17	0	0	20	0	0	0		0	0		0	0		0	0		0	0		0	0
	18	16200952	C	<*>	0	17	0	0	20	0	0	0		0	0		0	0		0	0		0	0		0	0
	18	16200953	A	<*>	0	17	0	0	20	0	0	0		0	0		0	0		0	0		0	0		0	0
	18	16200954	G	<*>	0	18	0	0	21	0	0	0		0	0		0	0		0	0		0	0		0	0
	18	16200955	T	<*>	0	17	0	0	21	0	0	0		0	0		0	0		0	0		0	0		0	0
	18	16200956	C	A	0	18	0	10	11	0.47619	0	0		0	0		0	0		0	0		0	0		0	0
	18	16200957	A	<*>	0	17	0	0	20	0	0	0		0	0		0	0		0	0		0	0		0	0
	18	16200958	C	<*>	0	17	0	0	20	0	0	0		0	0		0	0		0	0		0	0		0	0
	18	16200959	T	<*>	0	16	0	0	20	0	0	0		0	0		0	0		0	0		0	0		0	0
	18	16200960	T	<*>	0	16	0	0	19	0	0	0		0	0		0	0		0	0		0	0		0	0
	18	16200961	A	G	0	16	0	0	19	0	0	0		0	0		0	0		0	0		0	0		0	0
	18	16200962	T	<*>	0	16	0	0	20	0	0	0		0	0		0	0		0	0		0	0		0	0
	18	16200963	A	<*>	0	17	0	0	22	0	0	0		0	0		0	0		0	0		0	0		0	0
	18	16200964	A	T	16	0	1	22	0	1	0	0		0	0		0	0		0	0		0	0		0	0
	18	16200965	T	<*>	0	15	0	0	22	0	0	0		0	0		0	0		0	0		0	0		0	0
	18	16200966	T	<*>	0	16	0	0	22	0	0	0		0	0		0	0		0	0		0	0		0	0
	18	16200967	A	<*>	0	16	0	0	21	0	0	0		0	0		0	0		0	0		0	0		0	0
	18	16200968	T	<*>	0	16	0	0	21	0	0	0		0	0		0	0		0	0		0	0		0	0
	18	16200969	T	<*>	0	16	0	0	21	0	0	0		0	0		0	0		0	0		0	0		0	0
	18	16200970	T	<*>	0	16	0	0	21	0	0	0		0	0		0	0		0	0		0	0		0	0
	18	16200971	A	<*>	0	17	0	0	21	0	0	0		0	0		0	0		0	0		0	0		0	0
	18	16200972	C	<*>	0	18	0	0	21	0	0	0		0	0		0	0		0	0		0	0		0	0
	18	16200973	C	<*>	0	18	0	0	21	0	0	0		0	0		0	0		0	0		0	0		0	0
	18	16200974	T	<*>	0	18	0	0	21	0	0	0		0	0		0	0		0	0		0	0		0	0
	18	16200975	T	<*>	0	18	0	0	22	0	0	0		0	0		0	0		0	0		0	0		0	0
	18	16200976	T	<*>	0	18	0	0	22	0	0	0		0	0		0	0		0	0		0	0		0	0
	18	16200977	T	<*>	0	17	0	0	23	0	0	0		0	0		0	0		0	0		0	0		0	0
	18	16200978	T	<*>	0	17	0	0	23	0	0	0		0	0		0	0		0	0		0	0		0	0
	18	16200979	T	<*>	0	17	0	0	23	0	0	0		0	0		0	0		0	0		0	0		0	0
	18	16200980	T	<*>	0	17	0	0	23	0	0	0		0	0		0	0		0	0		0	0		0	0
	18	16200981	G	<*>	0	18	0	0	21	0	0	0		0	0		0	0		0	0		0	0		0	0
	18	16200982	T	<*>	0	18	0	0	21	0	0	0		0	0		0	0		0	0		0	0		0	0
	18	16200983	C	<*>	0	18	0	0	20	0	0	0		0	0		0	0		0	0		0	0		0	0
	18	16200984	A	<*>	0	19	0	0	19	0	0	0		0	0		0	0		0	0		0	0		0	0
	18	16200985	G	<*>	0	18	0	0	20	0	0	0		0	0		0	0		0	0		0	0		0	0
	18	16200986	A	G	9	10	0.473684	20	0	1	0	0		0	0		0	0		0	0		0	0		0	0
	18	16200986	A	T	0	10	0	0	0		0	0		0	0		0	0		0	0		0	0		0	0
	18	16200987	G	<*>	0	19	0	0	21	0	0	0		0	0		0	0		0	0		0	0		0	0
	18	16200988	T	<*>	0	19	0	0	19	0	0	0		0	0		0	0		0	0		0	0		0	0
	18	16200989	C	<*>	0	18	0	0	19	0	0	0		0	0		0	0		0	0		0	0		0	0
	18	16200990	T	<*>	0	18	0	0	22	0	0	0		0	0		0	0		0	0		0	0		0	0
	18	16200991	A	<*>	0	20	0	0	22	0	0	0		0	0		0	0		0	0		0	0		0	0
	18	16200992	G	<*>	0	20	0	0	21	0	0	0		0	0		0	0		0	0		0	0		0	0
	18	16200993	T	<*>	0	20	0	0	21	0	0	0		0	0		0	0		0	0		0	0		0	0
	18	16200994	C	<*>	0	20	0	0	21	0	0	0		0	0		0	0		0	0		0	0		0	0
	18	16200995	A	<*>	0	19	0	0	20	0	0	0		0	0		0	0		0	0		0	0		0	0
	18	16200996	C	<*>	0	20	0	0	20	0	0	0		0	0		0	0		0	0		0	0		0	0
	18	16200997	A	<*>	0	20	0	0	20	0	0	0		0	0		0	0		0	0		0	0		0	0
	18	16200998	T	<*>	0	20	0	0	19	0	0	0		0	0		0	0		0	0		0	0		0	0
	18	16200999	C	<*>	0	20	0	0	19	0	0	0		0	0		0	0		0	0		0	0		0	0
	18	16201000	A	<*>	0	20	0	0	19	0	0	0		0	0		0	0		0	0		0	0		0	0
	18	16201001	T	<*>	0	20	0	0	19	0	0	0		0	0		0	0		0	0		0	0		0	0
	18	16201002	T	<*>	0	20	0	0	19	0	0	0		0	0		0	0		0	0		0	0		0	0
	18	16201003	A	<*>	0	21	0	0	19	0	0	0		0	0		0	0		0	0		0	0		0	0
	18	16201004	A	<*>	0	21	0	0	19	0	0	0		0	0		0	0		0	0		0	0		0	0
	18	16201005	T	<*>	0	21	0	0	19	0	0	0		0	0		0	0		0	0		0	0		0	0
	18	16201006	T	<*>	0	21	0	0	19	0	0	0		0	0		0	0		0	0		0	0		0	0
	18	16201007	T	<*>	0	21	0	0	19	0	0	0		0	0		0	0		0	0		0	0		0	0
	18	16201008	G	<*>	0	22	0	0	19	0	0	0		0	0		0	0		0	0		0	0		0	0
	18	16201009	A	<*>	0	21	0	0	19	0	0	0		0	0		0	0		0	0		0	0		0	0
	18	16201010	C	<*>	0	21	0	0	19	0	0	0		0	0		0	0		0	0		0	0		0	0
	18	16201011	C	<*>	0	21	0	0	19	0	0	0		0	0		0	0		0	0		0	0		0	0
	18	16201012	A	<*>	0	21	0	0	20	0	0	0		0	0		0	0		0	0		0	0		0	0
	18	16201013	T	<*>	0	21	0	0	20	0	0	0		0	0		0	0		0	0		0	0		0	0
	18	16201014	C	<*>	0	21	0	0	19	0	0	0		0	0		0	0		0	0		0	0		0	0
	18	16201015	A	<*>	0	19	0	0	19	0	0	0		0	0		0	0		0	0		0	0		0	0
	18	16201016	T	<*>	0	19	0	0	19	0	0	0		0	0		0	0		0	0		0	0		0	0
	18	16201017	A	<*>	0	19	0	0	19	0	0	0		0	0		0	0		0	0		0	0		0	0
	18	16201018	T	<*>	0	19	0	0	18	0	0	0		0	0		0	0		0	0		0	0		0	0
	18	16201019	A	<*>	0	20	0	0	19	0	0	0		0	0		0	0		0	0		0	0		0	0
	18	16201020	T	<*>	0	20	0	0	19	0	0	0		0	0		0	0		0	0		0	0		0	0
	18	16201021	C	<*>	0	21	0	0	19	0	0	0		0	0		0	0		0	0		0	0		0	0
	18	16201022	A	<*>	0	21	0	0	19	0	0	0		0	0		0	0		0	0		0	0		0	0
	18	16201023	A	<*>	0	23	0	0	20	0	0	0		0	0		0	0		0	0		0	0		0	0
	18	16201024	T	<*>	0	23	0	0	20	0	0	0		0	0		0	0		0	0		0	0		0	0
	18	16201025	T	<*>	0	23	0	0	20	0	0	0		0	0		0	0		0	0		0	0		0	0
	18	16201026	A	<*>	0	24	0	0	19	0	0	0		0	0		0	0		0	0		0	0		0	0
	18	16201027	A	<*>	0	25	0	0	19	0	0	0		0	0		0	0		0	0		0	0		0	0
	18	16201028	C	<*>	0	25	0	0	19	0	0	0		0	0		0	0		0	0		0	0		0	0
	18	16201029	C	<*>	0	25	0	0	19	0	0	0		0	0		0	0		0	0		0	0		0	0
	18	16201030	A	<*>	0	25	0	0	19	0	0	0		0	0		0	0		0	0		0	0		0	0
	18	16201031	G	<*>	0	25	0	0	19	0	0	0		0	0		0	0		0	0		0	0		0	0
	18	16201032	G	<*>	0	25	0	0	19	0	0	0		0	0		0	0		0	0		0	0		0	0
	18	16201033	C	<*>	0	25	0	0	19	0	0	0		0	0		0	0		0	0		0	0		0	0
	18	16201034	A	<*>	0	25	0	0	20	0	0	0		0	0		0	0		0	0		0	0		0	0
	18	16201035	A	<*>	0	25	0	0	20	0	0	0		0	0		0	0		0	0		0	0		0	0
	18	16201036	C	<*>	0	25	0	0	20	0	0	0		0	0		0	0		0	0		0	0		0	0
	18	16201037	A	<*>	0	25	0	0	20	0	0	0		0	0		0	0		0	0		0	0		0	0
	18	16201038	A	G	0	24	0	0	20	0	0	0		0	0		0	0		0	0		0	0		0	0
	18	16201039	A	<*>	0	24	0	0	20	0	0	0		0	0		0	0		0	0		0	0		0	0
	18	16201040	C	<*>	0	23	0	0	19	0	0	0		0	0		0	0		0	0		0	0		0	0
	18	16201041	T	<*>	0	23	0	0	19	0	0	0		0	0		0	0		0	0		0	0		0	0
	18	16201042	T	<*>	0	23	0	0	19	0	0	0		0	0		0	0		0	0		0	0		0	0
	18	16201043	C	<*>	0	24	0	0	19	0	0	0		0	0		0	0		0	0		0	0		0	0
	18	16201044	A	<*>	0	25	0	0	19	0	0	0		0	0		0	0		0	0		0	0		0	0
	18	16201045	A	<*>	0	25	0	0	19	0	0	0		0	0		0	0		0	0		0	0		0	0
	18	16201046	T	<*>	0	25	0	0	19	0	0	0		0	0		0	0		0	0		0	0		0	0
	18	16201047	T	<*>	0	25	0	0	19	0	0	0		0	0		0	0		0	0		0	0		0	0
	18	16201048	A	<*>	0	25	0	0	19	0	0	0		0	0		0	0		0	0		0	0		0	0
	18	16201049	T	<*>	0	25	0	0	19	0	0	0		0	0		0	0		0	0		0	0		0	0
	18	16201050	T	<*>	0	25	0	0	19	0	0	0		0	0		0	0		0	0		0	0		0	0
	18	16201051	T	<*>	0	26	0	0	18	0	0	0		0	0		0	0		0	0		0	0		0	0
	18	16201052	G	<*>	0	26	0	0	17	0	0	0		0	0		0	0		0	0		0	0		0	0
	18	16201053	G	<*>	0	26	0	0	19	0	0	0		0	0		0	0		0	0		0	0		0	0
	18	16201054	C	<*>	0	26	0	0	18	0	0	0		0	0		0	0		0	0		0	0		0	0
	18	16201055	A	<*>	0	25	0	0	18	0	0	0		0	0		0	0		0	0		0	0		0	0
	18	16201056	A	<*>	0	26	0	0	18	0	0	0		0	0		0	0		0	0		0	0		0	0
	18	16201057	C	<*>	0	26	0	0	18	0	0	0		0	0		0	0		0	0		0	0		0	0
	18	16201058	T	<*>	0	26	0	0	18	0	0	0		0	0		0	0		0	0		0	0		0	0
	18	16201059	C	<*>	0	27	0	0	18	0	0	0		0	0		0	0		0	0		0	0		0	0
	18	16201060	G	<*>	0	27	0	0	18	0	0	0		0	0		0	0		0	0		0	0		0	0
	18	16201061	A	<*>	0	27	0	0	18	0	0	0		0	0		0	0		0	0		0	0		0	0
	18	16201062	C	<*>	0	28	0	0	17	0	0	0		0	0		0	0		0	0		0	0		0	0
	18	16201063	T	<*>	0	28	0	0	17	0	0	0		0	0		0	0		0	0		0	0		0	0
	18	16201064	C	<*>	0	28	0	0	17	0	0	0		0	0		0	0		0	0		0	0		0	0
	18	16201065	T	<*>	0	28	0	0	17	0	0	0		0	0		0	0		0	0		0	0		0	0
	18	16201066	A	<*>	0	28	0	0	17	0	0	0		0	0		0	0		0	0		0	0		0	0
	18	16201067	A	<*>	0	27	0	0	17	0	0	0		0	0		0	0		0	0		0	0		0	0
	18	16201068	A	<*>	0	28	0	0	17	0	0	0		0	0		0	0		0	0		0	0		0	0
	18	16201069	A	<*>	0	28	0	0	17	0	0	0		0	0		0	0		0	0		0	0		0	0
	18	16201070	A	<*>	0	28	0	0	17	0	0	0		0	0		0	0		0	0		0	0		0	0
	18	16201071	G	<*>	0	28	0	0	17	0	0	0		0	0		0	0		0	0		0	0		0	0
	18	16201072	C	T	0	28	0	11	7	0.611111	0	0		0	0		0	0		0	0		0	0		0	0
	18	16201073	A	<*>	0	28	0	0	19	0	0	0		0	0		0	0		0	0		0	0		0	0
	18	16201074	A	<*>	0	30	0	0	18	0	0	0		0	0		0	0		0	0		0	0		0	0
	18	16201075	G	<*>	0	31	0	0	18	0	0	0		0	0		0	0		0	0		0	0		0	0
	18	16201076	T	<*>	0	31	0	0	18	0	0	0		0	0		0	0		0	0		0	0		0	0
	18	16201077	T	<*>	0	30	0	0	18	0	0	0		0	0		0	0		0	0		0	0		0	0
	18	16201078	T	<*>	0	30	0	0	18	0	0	0		0	0		0	0		0	0		0	0		0	0
	18	16201079	C	<*>	0	30	0	0	18	0	0	0		0	0		0	0		0	0		0	0		0	0
	18	16201080	C	<*>	0	29	0	0	19	0	0	0		0	0		0	0		0	0		0	0		0	0
	18	16201081	A	<*>	0	29	0	0	19	0	0	0		0	0		0	0		0	0		0	0		0	0
	18	16201082	A	<*>	0	28	0	0	19	0	0	0		0	0		0	0		0	0		0	0		0	0
	18	16201083	A	<*>	0	28	0	0	19	0	0	0		0	0		0	0		0	0		0	0		0	0
	18	16201084	G	<*>	0	28	0	0	19	0	0	0		0	0		0	0		0	0		0	0		0	0
	18	16201085	A	<*>	0	28	0	0	19	0	0	0		0	0		0	0		0	0		0	0		0	0
	18	16201086	A	<*>	0	28	0	0	18	0	0	0		0	0		0	0		0	0		0	0		0	0
	18	16201087	G	<*>	0	28	0	0	17	0	0	0		0	0		0	0		0	0		0	0		0	0
	18	16201088	C	<*>	0	28	0	0	18	0	0	0		0	0		0	0		0	0		0	0		0	0
	18	16201089	A	<*>	0	28	0	0	19	0	0	0		0	0		0	0		0	0		0	0		0	0
	18	16201090	T	<*>	0	29	0	0	18	0	0	0		0	0		0	0		0	0		0	0		0	0
	18	16201091	A	<*>	0	28	0	0	18	0	0	0		0	0		0	0		0	0		0	0		0	0
	18	16201092	T	<*>	0	28	0	0	18	0	0	0		0	0		0	0		0	0		0	0		0	0
	18	16201093	G	<*>	0	28	0	0	18	0	0	0		0	0		0	0		0	0		0	0		0	0
	18	16201094	A	<*>	0	28	0	0	18	0	0	0		0	0		0	0		0	0		0	0		0	0
	18	16201095	T	<*>	0	28	0	0	18	0	0	0		0	0		0	0		0	0		0	0		0	0
	18	16201096	T	<*>	0	27	0	0	18	0	0	0		0	0		0	0		0	0		0	0		0	0
	18	16201097	C	<*>	0	26	0	0	18	0	0	0		0	0		0	0		0	0		0	0		0	0
	18	16201098	T	<*>	0	26	0	0	18	0	0	0		0	0		0	0		0	0		0	0		0	0
	18	16201099	C	<*>	0	26	0	0	18	0	0	0		0	0		0	0		0	0		0	0		0	0
	18	16201100	A	<*>	0	26	0	0	17	0	0	0		0	0		0	0		0	0		0	0		0	0
	18	16201101	C	<*>	0	25	0	0	17	0	0	0		0	0		0	0		0	0		0	0		0	0
	18	16201102	T	<*>	0	25	0	0	16	0	0	0		0	0		0	0		0	0		0	0		0	0
	18	16201103	A	<*>	0	25	0	0	17	0	0	0		0	0		0	0		0	0		0	0		0	0
	18	16201104	T	<*>	0	25	0	0	17	0	0	0		0	0		0	0		0	0		0	0		0	0
	18	16201105	G	<*>	0	25	0	0	17	0	0	0		0	0		0	0		0	0		0	0		0	0
	18	16201106	A	G	0	25	0	5	12	0.294118	0	0		0	0		0	0		0	0		0	0		0	0
	18	16201107	A	<*>	0	25	0	0	17	0	0	0		0	0		0	0		0	0		0	0		0	0
	18	16201108	A	<*>	0	22	0	0	17	0	0	0		0	0		0	0		0	0		0	0		0	0
	18	16201109	C	<*>	0	22	0	0	17	0	0	0		0	0		0	0		0	0		0	0		0	0
	18	16201110	T	<*>	0	22	0	0	17	0	0	0		0	0		0	0		0	0		0	0		0	0
	18	16201111	T	<*>	0	22	0	0	17	0	0	0		0	0		0	0		0	0		0	0		0	0
	18	16201112	C	<*>	0	22	0	0	16	0	0	0		0	0		0	0		0	0		0	0		0	0
	18	16201113	A	<*>	0	22	0	0	17	0	0	0		0	0		0	0		0	0		0	0		0	0
	18	16201114	A	<*>	0	22	0	0	17	0	0	0		0	0		0	0		0	0		0	0		0	0
	18	16201115	T	<*>	0	21	0	0	15	0	0	0		0	0		0	0		0	0		0	0		0	0
	18	16201116	T	<*>	0	21	0	0	13	0	0	0		0	0		0	0		0	0		0	0		0	0
	18	16201117	A	<*>	0	21	0	0	13	0	0	0		0	0		0	0		0	0		0	0		0	0
	18	16201118	G	<*>	0	21	0	0	13	0	0	0		0	0		0	0		0	0		0	0		0	0
	18	16201119	A	<*>	0	21	0	0	13	0	0	0		0	0		0	0		0	0		0	0		0	0
	18	16201120	A	<*>	0	21	0	0	13	0	0	0		0	0		0	0		0	0		0	0		0	0
	18	16201121	A	<*>	0	21	0	0	13	0	0	0		0	0		0	0		0	0		0	0		0	0
	18	16201122	A	<*>	0	21	0	0	13	0	0	0		0	0		0	0		0	0		0	0		0	0
	18	16201123	A	<*>	0	20	0	0	14	0	0	0		0	0		0	0		0	0		0	0		0	0
	18	16201124	C	<*>	0	20	0	0	14	0	0	0		0	0		0	0		0	0		0	0		0	0
	18	16201125	A	<*>	0	21	0	0	14	0	0	0		0	0		0	0		0	0		0	0		0	0
	18	16201126	A	<*>	0	21	0	0	16	0	0	0		0	0		0	0		0	0		0	0		0	0
	18	16201127	G	<*>	0	22	0	0	16	0	0	0		0	0		0	0		0	0		0	0		0	0
	18	16201128	C	<*>	0	21	0	0	16	0	0	0		0	0		0	0		0	0		0	0		0	0
	18	16201129	T	<*>	0	21	0	0	16	0	0	0		0	0		0	0		0	0		0	0		0	0
	18	16201130	C	<*>	0	21	0	0	16	0	0	0		0	0		0	0		0	0		0	0		0	0
	18	16201131	T	<*>	0	22	0	0	16	0	0	0		0	0		0	0		0	0		0	0		0	0
	18	16201132	T	<*>	0	22	0	0	16	0	0	0		0	0		0	0		0	0		0	0		0	0
	18	16201133	A	<*>	0	21	0	0	16	0	0	0		0	0		0	0		0	0		0	0		0	0
	18	16201134	G	<*>	0	21	0	0	16	0	0	0		0	0		0	0		0	0		0	0		0	0
	18	16201135	G	<*>	0	21	0	0	17	0	0	0		0	0		0	0		0	0		0	0		0	0
	18	16201136	A	<*>	0	21	0	0	17	0	0	0		0	0		0	0		0	0		0	0		0	0
	18	16201137	A	<*>	0	21	0	0	16	0	0	0		0	0		0	0		0	0		0	0		0	0
	18	16201138	A	<*>	0	21	0	0	16	0	0	0		0	0		0	0		0	0		0	0		0	0
	18	16201139	A	<*>	0	20	0	0	16	0	0	0		0	0		0	0		0	0		0	0		0	0
	18	16201140	G	<*>	0	20	0	0	16	0	0	0		0	0		0	0		0	0		0	0		0	0
	18	16201141	G	<*>	0	19	0	0	16	0	0	0		0	0		0	0		0	0		0	0		0	0
	18	16201142	C	<*>	0	19	0	0	16	0	0	0		0	0		0	0		0	0		0	0		0	0
	18	16201143	T	<*>	0	19	0	0	15	0	0	0		0	0		0	0		0	0		0	0		0	0
	18	16201144	T	<*>	0	18	0	0	15	0	0	0		0	0		0	0		0	0		0	0		0	0
	18	16201145	T	<*>	0	18	0	0	15	0	0	0		0	0		0	0		0	0		0	0		0	0
	18	16201146	G	<*>	0	18	0	0	16	0	0	0		0	0		0	0		0	0		0	0		0	0
	18	16201147	C	<*>	0	18	0	0	16	0	0	0		0	0		0	0		0	0		0	0		0	0
	18	16201148	T	<*>	0	17	0	0	16	0	0	0		0	0		0	0		0	0		0	0		0	0
	18	16201149	T	<*>	0	17	0	0	17	0	0	0		0	0		0	0		0	0		0	0		0	0
	18	16201150	C	<*>	0	17	0	0	17	0	0	0		0	0		0	0		0	0		0	0		0	0
	18	16201151	C	<*>	0	17	0	0	18	0	0	0		0	0		0	0		0	0		0	0		0	0
	18	16201152	C	<*>	0	16	0	0	18	0	0	0		0	0		0	0		0	0		0	0		0	0
	18	16201153	A	<*>	0	16	0	0	18	0	0	0		0	0		0	0		0	0		0	0		0	0
	18	16201154	C	<*>	0	16	0	0	18	0	0	0		0	0		0	0		0	0		0	0		0	0
	18	16201155	A	C	16	0	1	20	0	1	0	0		0	0		0	0		0	0		0	0		0	0
	18	16201156	T	<*>	0	16	0	0	20	0	0	0		0	0		0	0		0	0		0	0		0	0
	18	16201157	A	<*>	0	16	0	0	20	0	0	0		0	0		0	0		0	0		0	0		0	0
	18	16201158	A	<*>	0	16	0	0	22	0	0	0		0	0		0	0		0	0		0	0		0	0
	18	16201159	A	<*>	0	16	0	0	22	0	0	0		0	0		0	0		0	0		0	0		0	0
	18	16201160	G	<*>	0	16	0	0	22	0	0	0		0	0		0	0		0	0		0	0		0	0
	18	16201161	A	<*>	0	16	0	0	22	0	0	0		0	0		0	0		0	0		0	0		0	0
	18	16201162	A	<*>	0	16	0	0	22	0	0	0		0	0		0	0		0	0		0	0		0	0
	18	16201163	A	<*>	0	16	0	0	22	0	0	0		0	0		0	0		0	0		0	0		0	0
	18	16201164	G	<*>	0	16	0	0	23	0	0	0		0	0		0	0		0	0		0	0		0	0
	18	16201165	G	<*>	0	18	0	0	24	0	0	0		0	0		0	0		0	0		0	0		0	0
	18	16201166	A	<*>	0	18	0	0	24	0	0	0		0	0		0	0		0	0		0	0		0	0
	18	16201167	T	<*>	0	18	0	0	25	0	0	0		0	0		0	0		0	0		0	0		0	0
	18	16201168	G	<*>	0	17	0	0	25	0	0	0		0	0		0	0		0	0		0	0		0	0
	18	16201169	GTGA	TTGG	0	17	0	0	10	0	0	0		0	0		0	0		0	0		0	0		0	0
	18	16201172	A	G	0	17	0	13	10	0.565217	0	0		0	0		0	0		0	0		0	0		0	0
	18	16201173	A	<*>	0	18	0	0	25	0	0	0		0	0		0	0		0	0		0	0		0	0
	18	16201174	G	<*>	0	18	0	0	25	0	0	0		0	0		0	0		0	0		0	0		0	0
	18	16201175	T	<*>	0	17	0	0	25	0	0	0		0	0		0	0		0	0		0	0		0	0
	18	16201176	C	<*>	0	17	0	0	25	0	0	0		0	0		0	0		0	0		0	0		0	0
	18	16201177	T	<*>	0	17	0	0	25	0	0	0		0	0		0	0		0	0		0	0		0	0
	18	16201178	A	<*>	0	17	0	0	24	0	0	0		0	0		0	0		0	0		0	0		0	0
	18	16201179	T	<*>	0	17	0	0	24	0	0	0		0	0		0	0		0	0		0	0		0	1	0
	18	16201180	G	<*>	0	16	0	0	24	0	0	0		0	0		0	0		0	0		0	0		0	1	0
	18	16201181	A	<*>	0	17	0	0	24	0	0	0		0	0		0	0		0	0		0	0		0	1	0
	18	16201182	T	<*>	0	17	0	0	24	0	0	0		0	0		0	0		0	0		0	0		0	1	0
	18	16201183	G	<*>	0	16	0	0	24	0	0	0		0	0		0	0		0	0		0	0		0	1	0
	18	16201184	C	<*>	0	16	0	0	25	0	0	0		0	0		0	0		0	0		0	0		0	1	0
	18	16201185	C	<*>	0	15	0	0	25	0	0	0		0	0		0	0		0	0		0	0		0	1	0
	18	16201186	T	<*>	0	14	0	0	25	0	0	0		0	0		0	0		0	0		0	0		0	1	0
	18	16201187	T	<*>	0	14	0	0	25	0	0	0		0	0		0	0		0	0		0	0		0	1	0
	18	16201188	A	<*>	0	14	0	0	25	0	0	0		0	0		0	0		0	0		0	0		0	1	0
	18	16201189	T	<*>	0	14	0	0	25	0	0	0		0	0		0	0		0	0		0	0		0	1	0
	18	16201190	A	<*>	0	14	0	0	25	0	0	0		0	0		0	0		0	0		0	0		0	1	0
	18	16201191	A	<*>	0	14	0	0	25	0	0	0		0	0		0	0		0	0		0	0		0	1	0
	18	16201192	C	<*>	0	13	0	0	25	0	0	0		0	0		0	0		0	0		0	0		0	1	0
	18	16201193	A	<*>	0	13	0	0	25	0	0	0		0	0		0	0		0	0		0	0		0	1	0
	18	16201194	T	<*>	0	13	0	0	23	0	0	0		0	0		0	0		0	0		0	0		0	1	0
	18	16201195	G	<*>	0	13	0	0	23	0	0	0		0	0		0	0		0	0		0	0		0	1	0
	18	16201196	T	<*>	0	12	0	0	23	0	0	0		0	0		0	0		0	0		0	0		0	1	0
	18	16201197	A	<*>	0	12	0	0	23	0	0	0		0	0		0	0		0	0		0	0		0	1	0
	18	16201198	A	<*>	0	11	0	0	22	0	0	0		0	0		0	0		0	0		0	0		0	1	0
	18	16201199	T	<*>	0	11	0	0	22	0	0	0		0	0		0	0		0	0		0	0		0	1	0
	18	16201200	T	<*>	0	10	0	0	22	0	0	0		0	0		0	0		0	0		0	0		0	1	0
	18	16201201	T	<*>	0	10	0	0	23	0	0	0		0	0		0	0		0	0		0	0		0	1	0
	18	16201202	A	<*>	0	10	0	0	23	0	0	0		0	0		0	0		0	0		0	0		0	1	0
	18	16201203	T	<*>	0	10	0	0	23	0	0	0		0	0		0	0		0	0		0	0		0	1	0
	18	16201204	G	<*>	0	10	0	0	23	0	0	0		0	0		0	0		0	0		0	0		0	1	0
	18	16201205	C	<*>	0	10	0	0	23	0	0	0		0	0		0	0		0	0		0	0		0	1	0
	18	16201206	A	<*>	0	11	0	0	23	0	0	0		0	0		0	0		0	0		0	0		0	1	0
	18	16201207	T	<*>	0	11	0	0	23	0	0	0		0	0		0	0		0	0		0	0		0	1	0
	18	16201208	G	<*>	0	13	0	0	23	0	0	0		0	0		0	0		0	0		0	0		0	1	0
	18	16201209	G	<*>	0	13	0	0	23	0	0	0		0	0		0	0		0	0		0	0		0	1	0
	18	16201210	T	<*>	0	13	0	0	23	0	0	0		0	0		0	0		0	0		0	0		0	1	0
	18	16201211	A	<*>	0	13	0	0	23	0	0	0		0	0		0	0		0	0		0	0		0	1	0
	18	16201212	A	<*>	0	13	0	0	22	0	0	0		0	0		0	0		0	0		0	0		0	1	0
	18	16201213	T	<*>	0	13	0	0	22	0	0	0		0	0		0	0		0	0		0	0		0	1	0
	18	16201214	C	<*>	0	12	0	0	21	0	0	0		0	0		0	0		0	0		0	0		0	1	0
	18	16201215	A	<*>	0	12	0	0	21	0	0	0		0	0		0	0		0	0		0	0		0	1	0
	18	16201216	A	<*>	0	14	0	0	20	0	0	0		0	0		0	0		0	0		0	0		0	1	0
	18	16201217	T	<*>	0	14	0	0	20	0	0	0		0	0		0	0		0	0		0	0		0	1	0
	18	16201218	G	<*>	0	14	0	0	21	0	0	0		0	0		0	0		0	0		0	0		0	1	0
	18	16201219	G	<*>	0	14	0	0	21	0	0	0		0	0		0	0		0	0		0	0		0	1	0
	18	16201220	C	<*>	0	14	0	0	21	0	0	0		0	0		0	0		0	0		0	0		0	1	0
	18	16201221	T	<*>	0	15	0	0	21	0	0	0		0	0		0	0		0	0		0	0		0	1	0
	18	16201222	T	<*>	0	15	0	0	23	0	0	0		0	0		0	0		0	0		0	0		0	1	0
	18	16201223	A	<*>	0	15	0	0	22	0	0	0		0	0		0	0		0	0		0	0		0	1	0
	18	16201224	A	<*>	0	15	0	0	22	0	0	0		0	0		0	0		0	0		0	0		0	1	0
	18	16201225	A	<*>	0	15	0	0	22	0	0	0		0	0		0	0		0	0		0	0		0	1	0
	18	16201226	T	<*>	0	15	0	0	21	0	0	0		0	0		0	0		0	0		0	0		0	1	0
	18	16201227	A	<*>	0	15	0	0	21	0	0	0		0	0		0	0		0	0		0	0		0	1	0
	18	16201228	T	<*>	0	16	0	0	21	0	0	0		0	0		0	0		0	0		0	0		0	1	0
	18	16201229	C	<*>	0	16	0	0	21	0	0	0		0	0		0	0		0	0		0	0		0	1	0
	18	16201230	C	<*>	0	17	0	0	22	0	0	0		0	0		0	0		0	0		0	0		0	1	0
	18	16201231	A	<*>	0	17	0	0	22	0	0	0		0	0		0	0		0	0		0	0		0	1	0
	18	16201232	A	<*>	0	17	0	0	22	0	0	0		0	0		0	0		0	0		0	0		0	1	0
	18	16201233	G	<*>	0	17	0	0	22	0	0	0		0	0		0	0		0	0		0	0		0	1	0
	18	16201234	T	<*>	0	17	0	0	22	0	0	0		0	0		0	0		0	0		0	0		0	1	0
	18	16201235	C	<*>	0	17	0	0	22	0	0	0		0	0		0	0		0	0		0	0		0	1	0
	18	16201236	A	<*>	0	17	0	0	21	0	0	0		0	0		0	0		0	0		0	0		0	1	0
	18	16201237	A	<*>	0	17	0	0	21	0	0	0		0	0		0	0		0	0		0	0		0	1	0
	18	16201238	C	<*>	0	17	0	0	21	0	0	0		0	0		0	0		0	0		0	0		0	1	0
	18	16201239	T	<*>	0	17	0	0	21	0	0	0		0	0		0	0		0	0		0	0		0	1	0
	18	16201240	A	<*>	0	17	0	0	21	0	0	0		0	0		0	0		0	0		0	0		0	1	0
	18	16201241	A	<*>	0	17	0	0	22	0	0	0		0	0		0	0		0	0		0	0		0	1	0
	18	16201242	T	<*>	0	18	0	0	22	0	0	0		0	0		0	0		0	0		0	0		0	1	0
	18	16201243	T	<*>	0	18	0	0	23	0	0	0		0	0		0	0		0	0		0	0		0	1	0
	18	16201244	A	<*>	0	18	0	0	24	0	0	0		0	0		0	0		0	0		0	0		0	1	0
	18	16201245	G	<*>	0	19	0	0	24	0	0	0		0	0		0	0		0	0		0	0		0	1	0
	18	16201246	A	<*>	0	19	0	0	24	0	0	0		0	0		0	0		0	0		0	0		0	1	0
	18	16201247	A	<*>	0	18	0	0	24	0	0	0		0	0		0	0		0	0		0	0		0	1	0
	18	16201248	A	<*>	0	18	0	0	23	0	0	0		0	0		0	0		0	0		0	0		0	1	0
	18	16201249	C	<*>	0	19	0	0	22	0	0	0		0	0		0	0		0	0		0	0		0	1	0
	18	16201250	T	<*>	0	19	0	0	22	0	0	0		0	0		0	0		0	0		0	0		0	1	0
	18	16201251	A	<*>	0	18	0	0	22	0	0	0		0	0		0	0		0	0		0	0		0	1	0
	18	16201252	A	<*>	0	18	0	0	22	0	0	0		0	0		0	0		0	0		0	0		0	1	0
	18	16201253	C	<*>	0	18	0	0	22	0	0	0		0	0		0	0		0	0		0	0		0	1	0
	18	16201254	T	<*>	0	19	0	0	22	0	0	0		0	0		0	0		0	0		0	0		0	1	0
	18	16201255	A	<*>	0	19	0	0	23	0	0	0		0	0		0	0		0	0		0	0		0	1	0
	18	16201256	A	<*>	0	18	0	0	23	0	0	0		0	0		0	0		0	0		0	0		0	1	0
	18	16201257	A	<*>	0	18	0	0	23	0	0	0		0	0		0	0		0	0		0	0		0	1	0
	18	16201258	C	<*>	0	19	0	0	23	0	0	0		0	0		0	0		0	0		0	0		0	1	0
	18	16201259	C	<*>	0	19	0	0	22	0	0	0		0	0		0	0		0	0		0	0		0	1	0
	18	16201260	A	<*>	0	19	0	0	22	0	0	0		0	0		0	0		0	0		0	0		0	1	0
	18	16201261	A	<*>	0	19	0	0	22	0	0	0		0	0		0	0		0	0		0	0		0	1	0
	18	16201262	C	<*>	0	19	0	0	22	0	0	0		0	0		0	0		0	0		0	0		0	1	0
	18	16201263	T	<*>	0	19	0	0	22	0	0	0		0	0		0	0		0	0		0	0		0	1	0
	18	16201264	T	<*>	0	19	0	0	22	0	0	0		0	0		0	0		0	0		0	0		0	1	0
	18	16201265	G	<*>	0	19	0	0	23	0	0	0		0	0		0	0		0	0		0	0		0	0
	18	16201266	A	<*>	0	19	0	0	23	0	0	0		0	0		0	0		0	0		0	0		0	0
	18	16201267	A	<*>	0	20	0	0	23	0	0	0		0	0		0	0		0	0		0	0		0	0
	18	16201268	C	<*>	0	20	0	0	23	0	0	0		0	0		0	0		0	0		0	0		0	0
	18	16201269	A	<*>	0	21	0	0	23	0	0	0		0	0		0	0		0	0		0	0		0	0
	18	16201270	T	<*>	0	23	0	0	24	0	0	0		0	0		0	0		0	0		0	0		0	0
	18	16201271	A	<*>	0	23	0	0	22	0	0	0		0	0		0	0		0	0		0	0		0	0
	18	16201272	A	<*>	0	24	0	0	22	0	0	0		0	0		0	0		0	0		0	0		0	0
	18	16201273	C	<*>	0	24	0	0	21	0	0	0		0	0		0	0		0	0		0	0		0	0
	18	16201274	A	<*>	0	24	0	0	20	0	0	0		0	0		0	0		0	0		0	0		0	0
	18	16201275	A	<*>	0	25	0	0	20	0	0	0		0	0		0	0		0	0		0	0		0	0
	18	16201276	T	<*>	0	25	0	0	20	0	0	0		0	0		0	0		0	0		0	0		0	0
	18	16201277	G	<*>	0	25	0	0	20	0	0	0		0	0		0	0		0	0		0	0		0	0
	18	16201278	G	<*>	0	25	0	0	21	0	0	0		0	0		0	0		0	0		0	0		0	0
	18	16201280	G	<*>	0	26	0	0	18	0	0	0		0	0		0	0		0	0		0	0		0	0
	18	16201281	T	<*>	0	26	0	0	19	0	0	0		0	0		0	0		0	0		0	0		0	0
	18	16201282	T	<*>	0	26	0	0	19	0	0	0		0	0		0	0		0	0		0	0		0	0
	18	16201283	A	G	0	26	0	0	19	0	0	0		0	0		0	0		0	0		0	0		0	0
	18	16201284	T	<*>	0	26	0	0	19	0	0	0		0	0		0	0		0	0		0	0		0	0
	18	16201285	A	<*>	0	27	0	0	19	0	0	0		0	0		0	0		0	0		0	0		0	0
	18	16201286	T	<*>	0	27	0	0	19	0	0	0		0	0		0	0		0	0		0	0		0	0
	18	16201287	C	<*>	0	28	0	0	19	0	0	0		0	0		0	0		0	0		0	0		0	0
	18	16201288	A	<*>	0	28	0	0	19	0	0	0		0	0		0	0		0	0		0	0		0	0
	18	16201289	A	<*>	0	28	0	0	18	0	0	0		0	0		0	0		0	0		0	0		0	0
	18	16201290	A	<*>	0	26	0	0	17	0	0	0		0	0		0	0		0	0		0	0		0	0
	18	16201291	T	<*>	0	26	0	0	16	0	0	0		0	0		0	0		0	0		0	0		0	0
	18	16201292	T	<*>	0	25	0	0	17	0	0	0		0	0		0	0		0	0		0	0		0	0
	18	16201293	T	<*>	0	25	0	0	17	0	0	0		0	0		0	0		0	0		0	0		0	0
	18	16201294	C	<*>	0	25	0	0	17	0	0	0		0	0		0	0		0	0		0	0		0	0
	18	16201295	A	<*>	0	25	0	0	17	0	0	0		0	0		0	0		0	0		0	0		0	0
	18	16201296	G	<*>	0	24	0	0	17	0	0	0		0	0		0	0		0	0		0	0		0	0
	18	16201297	C	<*>	0	25	0	0	17	0	0	0		0	0		0	0		0	0		0	0		0	0
	18	16201298	A	<*>	0	25	0	0	17	0	0	0		0	0		0	0		0	0		0	0		0	0
	18	16201299	A	<*>	0	25	0	0	17	0	0	0		0	0		0	0		0	0		0	0		0	0
	18	16201300	C	<*>	0	25	0	0	17	0	0	0		0	0		0	0		0	0		0	0		0	0
	18	16201301	T	<*>	0	25	0	0	17	0	0	0		0	0		0	0		0	0		0	0		0	0
	18	16201302	C	<*>	0	25	0	0	18	0	0	0		0	0		0	0		0	0		0	0		0	0
	18	16201303	C	<*>	0	26	0	0	18	0	0	0		0	0		0	0		0	0		0	0		0	0
	18	16201304	A	<*>	0	26	0	0	18	0	0	0		0	0		0	0		0	0		0	0		0	0
	18	16201305	T	<*>	0	26	0	0	18	0	0	0		0	0		0	0		0	0		0	0		0	0
	18	16201306	G	<*>	0	26	0	0	18	0	0	0		0	0		0	0		0	0		0	0		0	0
	18	16201307	T	<*>	0	26	0	0	18	0	0	0		0	0		0	0		0	0		0	0		0	0
	18	16201308	T	<*>	0	26	0	0	17	0	0	0		0	0		0	0		0	0		0	0		0	0
	18	16201309	G	<*>	0	26	0	0	17	0	0	0		0	0		0	0		0	0		0	0		0	0
	18	16201310	T	<*>	0	27	0	0	17	0	0	0		0	0		0	0		0	0		0	0		0	0
	18	16201311	C	<*>	0	26	0	0	17	0	0	0		0	0		0	0		0	0		0	0		0	0
	18	16201312	T	<*>	0	26	0	0	17	0	0	0		0	0		0	0		0	0		0	0		0	0
	18	16201313	C	<*>	0	27	0	0	17	0	0	0		0	0		0	0		0	0		0	0		0	0
	18	16201314	T	<*>	0	27	0	0	17	0	0	0		0	0		0	0		0	0		0	0		0	0
	18	16201315	A	<*>	0	27	0	0	17	0	0	0		0	0		0	0		0	0		0	0		0	0
	18	16201316	A	<*>	0	27	0	0	17	0	0	0		0	0		0	0		0	0		0	0		0	0
	18	16201317	T	<*>	0	27	0	0	17	0	0	0		0	0		0	0		0	0		0	0		0	0
	18	16201318	C	<*>	0	27	0	0	17	0	0	0		0	0		0	0		0	0		0	0		0	0
	18	16201319	T	<*>	0	27	0	0	17	0	0	0		0	0		0	0		0	0		0	0		0	0
	18	16201320	A	<*>	0	27	0	0	17	0	0	0		0	0		0	0		0	0		0	0		0	0
	18	16201321	A	<*>	0	27	0	0	17	0	0	0		0	0		0	0		0	0		0	0		0	0
	18	16201322	G	<*>	0	27	0	0	17	0	0	0		0	0		0	0		0	0		0	0		0	0
	18	16201323	A	<*>	0	27	0	0	17	0	0	0		0	0		0	0		0	0		0	0		0	0
	18	16201324	C	<*>	0	27	0	0	18	0	0	0		0	0		0	0		0	0		0	0		0	0
	18	16201325	A	<*>	0	27	0	0	18	0	0	0		0	0		0	0		0	0		0	0		0	0
	18	16201326	A	<*>	0	28	0	0	17	0	0	0		0	0		0	0		0	0		0	0		0	0
	18	16201327	T	<*>	0	28	0	0	17	0	0	0		0	0		0	0		0	0		0	0		0	0
	18	16201328	T	<*>	0	28	0	0	17	0	0	0		0	0		0	0		0	0		0	0		0	0
	18	16201329	T	<*>	0	28	0	0	17	0	0	0		0	0		0	0		0	0		0	0		0	0
	18	16201330	T	<*>	0	28	0	0	17	0	0	0		0	0		0	0		0	0		0	0		0	0
	18	16201331	G	<*>	0	29	0	0	17	0	0	0		0	0		0	0		0	0		0	0		0	0
	18	16201332	G	<*>	0	27	0	0	17	0	0	0		0	0		0	0		0	0		0	0		0	0
	18	16201333	A	<*>	0	27	0	0	17	0	0	0		0	0		0	0		0	0		0	0		0	0
	18	16201334	A	<*>	0	27	0	0	17	0	0	0		0	0		0	0		0	0		0	0		0	0
	18	16201335	T	<*>	0	26	0	0	17	0	0	0		0	0		0	0		0	0		0	0		0	0
	18	16201336	G	<*>	0	26	0	0	17	0	0	0		0	0		0	0		0	0		0	0		0	0
	18	16201337	G	<*>	0	26	0	0	17	0	0	0		0	0		0	0		0	0		0	0		0	0
	18	16201339	A	<*>	0	25	0	0	18	0	0	0		0	0		0	0		0	0		0	0		0	0
	18	16201340	A	<*>	0	25	0	0	18	0	0	0		0	0		0	0		0	0		0	0		0	0
	18	16201341	T	<*>	0	25	0	0	18	0	0	0		0	0		0	0		0	0		0	0		0	0
	18	16201342	G	<*>	0	25	0	0	17	0	0	0		0	0		0	0		0	0		0	0		0	0
	18	16201343	A	<*>	0	27	0	0	18	0	0	0		0	0		0	0		0	0		0	0		0	0
	18	16201344	T	<*>	0	28	0	0	18	0	0	0		0	0		0	0		0	0		0	0		0	0
	18	16201345	A	<*>	0	28	0	0	18	0	0	0		0	0		0	0		0	0		0	0		0	0
	18	16201346	A	<*>	0	27	0	0	18	0	0	0		0	0		0	0		0	0		0	0		0	0
	18	16201347	G	<*>	0	28	0	0	16	0	0	0		0	0		0	0		0	0		0	0		0	0
	18	16201348	T	<*>	0	28	0	0	16	0	0	0		0	0		0	0		0	0		0	0		0	0
	18	16201349	G	<*>	0	29	0	0	16	0	0	0		0	0		0	0		0	0		0	0		0	0
	18	16201350	A	<*>	0	29	0	0	16	0	0	0		0	0		0	0		0	0		0	0		0	0
	18	16201351	G	<*>	0	29	0	0	16	0	0	0		0	0		0	0		0	0		0	0		0	0
	18	16201352	A	<*>	0	29	0	0	16	0	0	0		0	0		0	0		0	0		0	0		0	0
	18	16201353	A	<*>	0	29	0	0	16	0	0	0		0	0		0	0		0	0		0	0		0	0
	18	16201354	T	<*>	0	31	0	0	16	0	0	0		0	0		0	0		0	0		0	0		0	0
	18	16201355	A	<*>	0	30	0	0	15	0	0	0		0	0		0	0		0	0		0	0		0	0
	18	16201356	T	<*>	0	30	0	0	15	0	0	0		0	0		0	0		0	0		0	0		0	0
	18	16201357	A	<*>	0	30	0	0	15	0	0	0		0	0		0	0		0	0		0	0		0	0
	18	16201358	T	<*>	0	29	0	0	15	0	0	0		0	0		0	0		0	0		0	0		0	0
	18	16201359	G	<*>	0	29	0	0	16	0	0	0		0	0		0	0		0	0		0	0		0	0
	18	16201360	T	<*>	0	29	0	0	16	0	0	0		0	0		0	0		0	0		0	0		0	0
	18	16201361	A	<*>	0	29	0	0	17	0	0	0		0	0		0	0		0	0		0	0		0	0
	18	16201362	A	<*>	0	29	0	0	17	0	0	0		0	0		0	0		0	0		0	0		0	0
	18	16201363	C	<*>	0	30	0	0	17	0	0	0		0	0		0	0		0	0		0	0		0	0
	18	16201364	T	<*>	0	30	0	0	17	0	0	0		0	0		0	0		0	0		0	0		0	0
	18	16201365	A	<*>	0	30	0	0	16	0	0	0		0	0		0	0		0	0		0	0		0	0
	18	16201366	A	<*>	0	30	0	0	17	0	0	0		0	0		0	0		0	0		0	0		0	0
	18	16201367	G	<*>	0	30	0	0	17	0	0	0		0	0		0	0		0	0		0	0		0	0
	18	16201368	T	<*>	0	30	0	0	15	0	0	0		0	0		0	0		0	0		0	0		0	0
	18	16201369	G	<*>	0	31	0	0	15	0	0	0		0	0		0	0		0	0		0	0		0	0
	18	16201370	G	<*>	0	30	0	0	15	0	0	0		0	0		0	0		0	0		0	0		0	0
	18	16201371	A	<*>	0	30	0	0	15	0	0	0		0	0		0	0		0	0		0	0		0	0
	18	16201372	T	<*>	0	30	0	0	15	0	0	0		0	0		0	0		0	0		0	0		0	0
	18	16201373	T	<*>	0	30	0	0	15	0	0	0		0	0		0	0		0	0		0	0		0	0
	18	16201374	T	<*>	0	29	0	0	15	0	0	0		0	0		0	0		0	0		0	0		0	0
	18	16201375	C	<*>	0	29	0	0	15	0	0	0		0	0		0	0		0	0		0	0		0	0
	18	16201376	A	<*>	0	29	0	0	15	0	0	0		0	0		0	0		0	0		0	0		0	0
	18	16201377	A	<*>	0	29	0	0	16	0	0	0		0	0		0	0		0	0		0	0		0	0
	18	16201379	T	<*>	0	28	0	0	16	0	0	0		0	0		0	0		0	0		0	0		0	0
	18	16201380	T	<*>	0	28	0	0	15	0	0	0		0	0		0	0		0	0		0	0		0	0
	18	16201381	A	<*>	0	28	0	0	15	0	0	0		0	0		0	0		0	0		0	0		0	0
	18	16201382	A	<*>	0	27	0	0	15	0	0	0		0	0		0	0		0	0		0	0		0	0
	18	16201383	A	<*>	0	28	0	0	15	0	0	0		0	0		0	0		0	0		0	0		0	0
	18	16201384	A	<*>	0	28	0	0	15	0	0	0		0	0		0	0		0	0		0	0		0	0
	18	16201385	G	<*>	0	28	0	0	15	0	0	0		0	0		0	0		0	0		0	0		0	0
	18	16201386	TAG	T	0	28	0	0	14	0	0	0		0	0		0	0		0	0		0	0		0	0
	18	16201390	A	<*>	0	28	0	0	13	0	0	0		0	0		0	0		0	0		0	0		0	0
	18	16201391	A	<*>	0	28	0	0	14	0	0	0		0	0		0	0		0	0		0	0		0	0
	18	16201392	T	<*>	0	28	0	0	14	0	0	0		0	0		0	0		0	0		0	0		0	0
	18	16201393	A	<*>	0	28	0	0	14	0	0	0		0	0		0	0		0	0		0	0		0	0
	18	16201394	T	<*>	0	27	0	0	14	0	0	0		0	0		0	0		0	0		0	0		0	0
	18	16201395	T	<*>	0	25	0	0	14	0	0	0		0	0		0	0		0	0		0	0		0	0
	18	16201396	T	G	24	0	1	14	0	1	0	0		0	0		0	0		0	0		0	0		0	0
	18	16201397	T	<*>	0	24	0	0	14	0	0	0		0	0		0	0		0	0		0	0		0	0
	18	16201398	A	<*>	0	24	0	0	14	0	0	0		0	0		0	0		0	0		0	0		0	0
	18	16201399	T	<*>	0	24	0	0	14	0	0	0		0	0		0	0		0	0		0	0		0	0
	18	16201400	C	<*>	0	24	0	0	14	0	0	0		0	0		0	0		0	0		0	0		0	0
	18	16201401	A	<*>	0	25	0	0	13	0	0	0		0	0		0	0		0	0		0	0		0	0
	18	16201402	T	<*>	0	25	0	0	13	0	0	0		0	0		0	0		0	0		0	0		0	0
	18	16201403	A	<*>	0	25	0	0	13	0	0	0		0	0		0	0		0	0		0	0		0	0
	18	16201404	T	<*>	0	26	0	0	13	0	0	0		0	0		0	0		0	0		0	0		0	0
	18	16201405	T	<*>	0	25	0	0	13	0	0	0		0	0		0	0		0	0		0	0		0	0
	18	16201406	C	<*>	0	26	0	0	12	0	0	0		0	0		0	0		0	0		0	0		0	0
	18	16201407	C	<*>	0	26	0	0	11	0	0	0		0	0		0	0		0	0		0	0		0	0
	18	16201408	A	<*>	0	27	0	0	11	0	0	0		0	0		0	0		0	0		0	0		0	0
	18	16201409	A	<*>	0	28	0	0	11	0	0	0		0	0		0	0		0	0		0	0		0	0
	18	16201410	C	<*>	0	29	0	0	11	0	0	0		0	0		0	0		0	0		0	0		0	0
	18	16201411	A	<*>	0	29	0	0	11	0	0	0		0	0		0	0		0	0		0	0		0	0
	18	16201412	A	<*>	0	28	0	0	11	0	0	0		0	0		0	0		0	0		0	0		0	0
	18	16201413	A	<*>	0	28	0	0	11	0	0	0		0	0		0	0		0	0		0	0		0	0
	18	16201414	A	<*>	0	28	0	0	11	0	0	0		0	0		0	0		0	0		0	0		0	0
	18	16201415	T	<*>	0	28	0	0	10	0	0	0		0	0		0	0		0	0		0	0		0	0
	18	16201416	C	<*>	0	28	0	0	10	0	0	0		0	0		0	0		0	0		0	0		0	0
	18	16201417	T	<*>	0	28	0	0	10	0	0	0		0	0		0	0		0	0		0	0		0	0
	18	16201418	A	<*>	0	27	0	0	11	0	0	0		0	0		0	0		0	0		0	0		0	0
	18	16201419	G	<*>	0	26	0	0	12	0	0	0		0	0		0	0		0	0		0	0		0	0
	18	16201420	A	<*>	0	27	0	0	12	0	0	0		0	0		0	0		0	0		0	0		0	0
	18	16201421	C	<*>	0	28	0	0	11	0	0	0		0	0		0	0		0	0		0	0		0	0
	18	16201422	T	<*>	0	26	0	0	11	0	0	0		0	0		0	0		0	0		0	0		0	0
	18	16201423	C	<*>	0	27	0	0	10	0	0	0		0	0		0	0		0	0		0	0		0	0
	18	16201424	T	<*>	0	27	0	0	10	0	0	0		0	0		0	0		0	0		0	0		0	0
	18	16201425	C	<*>	0	27	0	0	10	0	0	0		0	0		0	0		0	0		0	0		0	0
	18	16201426	C	<*>	0	27	0	0	10	0	0	0		0	0		0	0		0	0		0	0		0	0
	18	16201427	A	<*>	0	27	0	0	10	0	0	0		0	0		0	0		0	0		0	0		0	0
	18	16201428	G	<*>	0	27	0	0	10	0	0	0		0	0		0	0		0	0		0	0		0	0
	18	16201429	T	<*>	0	27	0	0	10	0	0	0		0	0		0	0		0	0		0	0		0	0
	18	16201430	C	<*>	0	26	0	0	10	0	0	0		0	0		0	0		0	0		0	0		0	0
	18	16201431	A	<*>	0	26	0	0	10	0	0	0		0	0		0	0		0	0		0	0		0	0
	18	16201432	C	<*>	0	26	0	0	10	0	0	0		0	0		0	0		0	0		0	0		0	0
	18	16201433	C	<*>	0	26	0	0	10	0	0	0		0	0		0	0		0	0		0	0		0	0
	18	16201434	C	<*>	0	25	0	0	10	0	0	0		0	0		0	0		0	0		0	0		0	0
	18	16201435	A	<*>	0	25	0	0	10	0	0	0		0	0		0	0		0	0		0	0		0	0
	18	16201436	A	<*>	0	25	0	0	10	0	0	0		0	0		0	0		0	0		0	0		0	0
	18	16201437	C	<*>	0	26	0	0	10	0	0	0		0	0		0	0		0	0		0	0		0	0
	18	16201438	T	<*>	0	25	0	0	10	0	0	0		0	0		0	0		0	0		0	0		0	0
	18	16201439	T	<*>	0	25	0	0	10	0	0	0		0	0		0	0		0	0		0	0		0	0
	18	16201440	C	<*>	0	24	0	0	10	0	0	0		0	0		0	0		0	0		0	0		0	0
	18	16201441	A	<*>	0	24	0	0	10	0	0	0		0	0		0	0		0	0		0	0		0	0
	18	16201442	T	<*>	0	24	0	0	10	0	0	0		0	0		0	0		0	0		0	0		0	0
	18	16201443	A	<*>	0	24	0	0	10	0	0	0		0	0		0	0		0	0		0	0		0	0
	18	16201444	T	<*>	0	24	0	0	10	0	0	0		0	0		0	0		0	0		0	0		0	0
	18	16201445	T	<*>	0	24	0	0	10	0	0	0		0	0		0	0		0	0		0	0		0	0
	18	16201446	G	<*>	0	24	0	0	10	0	0	0		0	0		0	0		0	0		0	0		0	0
	18	16201447	T	<*>	0	24	0	0	9	0	0	0		0	0		0	0		0	0		0	0		0	0
	18	16201448	G	<*>	0	24	0	0	9	0	0	0		0	0		0	0		0	0		0	0		0	0
	18	16201449	A	<*>	0	25	0	0	9	0	0	0		0	0		0	0		0	0		0	0		0	0
	18	16201450	T	<*>	0	25	0	0	9	0	0	0		0	0		0	0		0	0		0	0		0	0
	18	16201451	C	<*>	0	25	0	0	9	0	0	0		0	0		0	0		0	0		0	0		0	0
	18	16201452	T	<*>	0	25	0	0	9	0	0	0		0	0		0	0		0	0		0	0		0	0
	18	16201453	G	A	0	25	0	0	9	0	0	0		0	0		0	0		0	0		0	0		0	0
	18	16201454	A	<*>	0	24	0	0	9	0	0	0		0	0		0	0		0	0		0	0		0	0
	18	16201455	A	<*>	0	24	0	0	9	0	0	0		0	0		0	0		0	0		0	0		0	0
	18	16201456	T	<*>	0	24	0	0	9	0	0	0		0	0		0	0		0	0		0	0		0	0
	18	16201457	A	<*>	0	24	0	0	10	0	0	0		0	0		0	0		0	0		0	0		0	0
	18	16201458	C	T	0	24	0	0	10	0	0	0		0	0		0	0		0	0		0	0		0	0
	18	16201459	A	<*>	0	24	0	0	10	0	0	0		0	0		0	0		0	0		0	0		0	0
	18	16201460	A	<*>	0	24	0	0	10	0	0	0		0	0		0	0		0	0		0	0		0	0
	18	16201461	T	<*>	0	24	0	0	10	0	0	0		0	0		0	0		0	0		0	0		0	0
	18	16201462	T	<*>	0	24	0	0	10	0	0	0		0	0		0	0		0	0		0	0		0	0
	18	16201463	A	<*>	0	24	0	0	10	0	0	0		0	0		0	0		0	0		0	0		0	0
	18	16201464	A	<*>	0	24	0	0	9	0	0	0		0	0		0	0		0	0		0	0		0	0
	18	16201465	G	<*>	0	25	0	0	10	0	0	0		0	0		0	0		0	0		0	0		0	0
	18	16201466	T	C	0	25	0	0	9	0	0	0		0	0		0	0		0	0		0	0		0	0
	18	16201467	G	<*>	0	25	0	0	10	0	0	0		0	0		0	0		0	0		0	0		0	0
	18	16201468	G	<*>	0	22	0	0	9	0	0	0		0	0		0	0		0	0		0	0		0	0
	18	16201469	T	<*>	0	22	0	0	9	0	0	0		0	0		0	0		0	0		0	0		0	0
	18	16201470	A	<*>	0	22	0	0	10	0	0	0		0	0		0	0		0	0		0	0		0	0
	18	16201471	C	<*>	0	22	0	0	10	0	0	0		0	0		0	0		0	0		0	0		0	0
	18	16201472	C	<*>	0	21	0	0	10	0	0	5	0	0	6	0	0	8	0	0	11	0	0	19	0	0	12	0
	18	16201473	T	<*>	0	21	0	0	11	0	0	5	0	0	6	0	0	8	0	0	11	0	0	19	0	0	12	0
	18	16201474	T	<*>	0	20	0	0	11	0	0	5	0	0	6	0	0	8	0	0	11	0	0	19	0	0	12	0
	18	16201475	C	<*>	0	20	0	0	12	0	0	5	0	0	6	0	0	8	0	0	11	0	0	20	0	0	12	0
	18	16201476	A	<*>	0	19	0	0	12	0	0	5	0	0	6	0	0	8	0	0	11	0	0	20	0	0	12	0
	18	16201477	G	<*>	0	19	0	0	12	0	0	5	0	0	6	0	0	8	0	0	11	0	0	20	0	0	12	0
	18	16201478	T	<*>	0	18	0	0	12	0	0	5	0	0	6	0	0	8	0	0	11	0	0	20	0	0	12	0
	18	16201479	T	<*>	0	18	0	0	12	0	0	5	0	0	6	0	0	8	0	0	11	0	0	20	0	0	12	0
	18	16201480	C	<*>	0	18	0	0	12	0	0	5	0	0	6	0	0	8	0	0	11	0	0	20	0	0	12	0
	18	16201481	A	<*>	0	18	0	0	12	0	0	5	0	0	6	0	0	7	0	0	11	0	0	21	0	0	12	0
	18	16201482	T	<*>	0	19	0	0	12	0	0	5	0	0	6	0	0	7	0	0	11	0	0	22	0	0	12	0
	18	16201483	C	<*>	0	19	0	0	12	0	0	5	0	0	6	0	0	7	0	0	11	0	0	22	0	0	12	0
	18	16201484	A	<*>	0	19	0	0	11	0	0	5	0	0	6	0	0	8	0	0	11	0	0	22	0	0	12	0
	18	16201485	G	<*>	0	19	0	0	10	0	0	5	0	0	6	0	0	8	0	0	10	0	0	22	0	0	12	0
	18	16201486	C	<*>	0	19	0	0	10	0	0	5	0	0	6	0	0	8	0	0	10	0	0	22	0	0	12	0
	18	16201487	C	<*>	0	19	0	0	10	0	0	6	0	0	7	0	0	8	0	0	10	0	0	22	0	0	14	0
	18	16201488	T	<*>	0	19	0	0	10	0	0	6	0	0	7	0	0	8	0	0	10	0	0	22	0	0	14	0
	18	16201489	C	<*>	0	19	0	0	10	0	0	6	0	0	7	0	0	8	0	0	10	0	0	22	0	0	14	0
	18	16201490	G	<*>	0	19	0	0	10	0	0	6	0	0	7	0	0	10	0	0	10	0	0	22	0	0	14	0
	18	16201491	C	<*>	0	19	0	0	9	0	0	6	0	0	7	0	0	10	0	0	10	0	0	22	0	0	14	0
	18	16201492	C	<*>	0	19	0	0	9	0	0	6	0	0	7	0	0	10	0	0	11	0	0	23	0	0	14	0
	18	16201493	T	<*>	0	19	0	0	9	0	0	6	0	0	7	0	0	10	0	0	11	0	0	23	0	0	14	0
	18	16201494	T	<*>	0	18	0	0	9	0	0	6	0	0	7	0	0	10	0	0	11	0	0	23	0	0	13	0
	18	16201495	C	<*>	0	19	0	0	9	0	0	6	0	0	7	0	0	10	0	0	11	0	0	23	0	0	13	0
	18	16201496	A	<*>	0	19	0	0	9	0	0	6	0	0	7	0	0	10	0	0	11	0	0	23	0	0	13	0
	18	16201497	A	<*>	0	19	0	0	10	0	0	6	0	0	7	0	0	10	0	0	9	0	0	23	0	0	13	0
	18	16201498	G	<*>	0	20	0	0	10	0	0	6	0	0	7	0	0	10	0	0	9	0	0	23	0	0	15	0
	18	16201499	C	<*>	0	20	0	0	10	0	0	6	0	0	7	0	0	10	0	0	9	0	0	22	0	0	14	0
	18	16201500	A	<*>	0	20	0	0	10	0	0	6	0	0	7	0	0	9	0	0	9	0	0	22	0	0	14	0
	18	16201501	T	<*>	0	20	0	0	10	0	0	5	0	0	7	0	0	9	0	0	10	0	0	22	0	0	14	0
	18	16201502	G	<*>	0	21	0	0	10	0	0	5	0	0	7	0	0	8	0	0	10	0	0	22	0	0	14	0
	18	16201503	C	<*>	0	21	0	0	10	0	0	5	0	0	7	0	0	8	0	0	10	0	0	22	0	0	14	0
	18	16201504	T	<*>	0	21	0	0	10	0	0	5	0	0	7	0	0	8	0	0	10	0	0	22	0	0	14	0
	18	16201505	T	<*>	0	22	0	0	10	0	0	5	0	0	7	0	0	8	0	0	10	0	0	22	0	0	14	0
	18	16201506	C	<*>	0	22	0	0	10	0	0	5	0	0	7	0	0	8	0	0	10	0	0	22	0	0	14	0
	18	16201507	C	<*>	0	23	0	0	10	0	0	5	0	0	7	0	0	8	0	0	10	0	0	22	0	0	14	0
	18	16201508	A	<*>	0	22	0	0	10	0	0	5	0	0	7	0	0	8	0	0	10	0	0	22	0	0	14	0
	18	16201509	T	<*>	0	22	0	0	10	0	0	5	0	0	7	0	0	8	0	0	9	0	0	22	0	0	12	0
	18	16201510	A	<*>	0	24	0	0	10	0	0	5	0	0	7	0	0	8	0	0	9	0	0	22	0	0	12	0
	18	16201511	A	<*>	0	24	0	0	10	0	0	5	0	0	7	0	0	8	0	0	9	0	0	22	0	0	12	0
	18	16201512	C	<*>	0	24	0	0	10	0	0	5	0	0	7	0	0	8	0	0	9	0	0	22	0	0	12	0
	18	16201513	T	<*>	0	25	0	0	10	0	0	5	0	0	5	0	0	8	0	0	9	0	0	22	0	0	12	0
	18	16201514	A	<*>	0	24	0	0	10	0	0	5	0	0	5	0	0	7	0	0	9	0	0	22	0	0	12	0
	18	16201515	C	<*>	0	24	0	0	10	0	0	5	0	0	5	0	0	7	0	0	9	0	0	22	0	0	12	0
	18	16201516	G	<*>	0	24	0	0	9	0	0	5	0	0	5	0	0	7	0	0	9	0	0	24	0	0	12	0
	18	16201517	A	<*>	0	23	0	0	9	0	0	5	0	0	4	0	0	7	0	0	9	0	0	22	0	0	12	0
	18	16201518	T	<*>	0	23	0	0	9	0	0	5	0	0	3	0	0	7	0	0	9	0	0	22	0	0	12	0
	18	16201519	G	<*>	0	23	0	0	10	0	0	5	0	0	3	0	0	7	0	0	9	0	0	22	0	0	12	0
	18	16201520	A	<*>	0	23	0	0	10	0	0	5	0	0	2	0	0	7	0	0	9	0	0	21	0	0	12	0
	18	16201521	A	<*>	0	23	0	0	10	0	0	5	0	0	2	0	0	7	0	0	9	0	0	20	0	0	11	0
	18	16201522	C	<*>	0	24	0	0	11	0	0	6	0	0	2	0	0	7	0	0	8	0	0	19	0	0	11	0
	18	16201523	C	<*>	0	24	0	0	12	0	0	6	0	0	1	0	0	6	0	0	7	0	0	18	0	0	11	0
	18	16201524	T	<*>	0	24	0	0	12	0	0	6	0	0	1	0	0	6	0	0	5	0	0	17	0	0	11	0
	18	16201525	G	<*>	0	24	0	0	12	0	0	6	0	0	1	0	0	5	0	0	5	0	0	15	0	0	11	0
	18	16201526	G	<*>	0	24	0	0	12	0	0	6	0	0	1	0	0	4	0	0	5	0	0	15	0	0	11	0
	18	16201527	A	<*>	0	23	0	0	12	0	0	6	0	0	1	0	0	4	0	0	5	0	0	15	0	0	11	0
	18	16201528	A	<*>	0	22	0	0	13	0	0	6	0	0	1	0	0	4	0	0	5	0	0	15	0	0	11	0
	18	16201529	T	<*>	0	21	0	0	13	0	0	6	0	0	1	0	0	4	0	0	5	0	0	14	0	0	11	0
	18	16201530	G	<*>	0	21	0	0	13	0	0	6	0	0	1	0	0	3	0	0	4	0	0	14	0	0	11	0
	18	16201531	A	<*>	0	21	0	0	13	0	0	5	0	0	1	0	0	3	0	0	3	0	0	14	0	0	11	0
	18	16201532	C	<*>	0	22	0	0	13	0	0	5	0	0	1	0	0	3	0	0	3	0	0	14	0	0	11	0
	18	16201533	T	<*>	0	20	0	0	13	0	0	5	0	0	1	0	0	2	0	0	3	0	0	14	0	0	11	0
	18	16201534	G	<*>	0	20	0	0	13	0	0	5	0	0	2	0	0	2	0	0	3	0	0	14	0	0	9	0
	18	16201535	A	<*>	0	20	0	0	13	0	0	3	0	0	2	0	0	2	0	0	3	0	0	12	0	0	9	0
	18	16201536	T	<*>	0	20	0	0	13	0	0	3	0	0	2	0	0	2	0	0	3	0	0	12	0	0	9	0
	18	16201537	C	<*>	0	20	0	0	13	0	0	3	0	0	2	0	0	2	0	0	2	0	0	11	0	0	9	0
	18	16201538	A	<*>	0	20	0	0	13	0	0	2	0	0	2	0	0	2	0	0	2	0	0	11	0	0	7	0
	18	16201539	A	<*>	0	20	0	0	13	0	0	2	0	0	2	0	0	2	0	0	2	0	0	11	0	0	7	0
	18	16201540	T	<*>	0	19	0	0	13	0	0	2	0	0	2	0	0	2	0	0	2	0	0	11	0	0	7	0
	18	16201541	C	<*>	0	19	0	0	13	0	0	2	0	0	2	0	0	2	0	0	2	0	0	10	0	0	8	0
	18	16201542	T	<*>	0	19	0	0	13	0	0	2	0	0	2	0	0	2	0	0	2	0	0	10	0	0	7	0
	18	16201543	G	<*>	0	20	0	0	12	0	0	2	0	0	2	0	0	2	0	0	2	0	0	9	0	0	7	0
	18	16201544	C	<*>	0	19	0	0	11	0	0	2	0	0	2	0	0	2	0	0	2	0	0	8	0	0	5	0
	18	16201545	A	<*>	0	18	0	0	11	0	0	2	0	0	2	0	0	2	0	0	2	0	0	8	0	0	5	0
	18	16201546	G	<*>	0	18	0	0	11	0	0	2	0	0	2	0	0	2	0	0	2	0	0	8	0	0	5	0
	18	16201547	G	<*>	0	19	0	0	11	0	0	2	0	0	2	0	0	2	0	0	2	0	0	8	0	0	5	0
	18	16201548	A	<*>	0	19	0	0	11	0	0	2	0	0	2	0	0	2	0	0	2	0	0	8	0	0	5	0
	18	16201549	A	<*>	0	19	0	0	11	0	0	2	0	0	3	0	0	2	0	0	2	0	0	8	0	0	5	0
	18	16201550	T	<*>	0	19	0	0	11	0	0	2	0	0	3	0	0	2	0	0	2	0	0	8	0	0	5	0
	18	16201551	A	<*>	0	19	0	0	11	0	0	2	0	0	4	0	0	2	0	0	2	0	0	8	0	0	5	0
	18	16201552	G	<*>	0	19	0	0	11	0	0	2	0	0	4	0	0	3	0	0	2	0	0	8	0	0	5	0
	18	16201553	C	<*>	0	19	0	0	11	0	0	2	0	0	4	0	0	3	0	0	2	0	0	8	0	0	5	0
	18	16201554	T	<*>	0	19	0	0	11	0	0	2	0	0	4	0	0	3	0	0	2	0	0	9	0	0	5	0
	18	16201555	G	<*>	0	19	0	0	12	0	0	2	0	0	4	0	0	3	0	0	2	0	0	9	0	0	5	0
	18	16201556	C	<*>	0	19	0	0	12	0	0	2	0	0	4	0	0	3	0	0	2	0	0	8	0	0	5	0
	18	16201557	C	<*>	0	19	0	0	12	0	0	2	0	0	4	0	0	3	0	0	2	0	0	8	0	0	5	0
	18	16201558	A	<*>	0	19	0	0	12	0	0	2	0	0	4	0	0	3	0	0	2	0	0	8	0	0	5	0
	18	16201559	T	<*>	0	19	0	0	12	0	0	2	0	0	4	0	0	3	0	0	2	0	0	8	0	0	5	0
	18	16201560	T	<*>	0	19	0	0	12	0	0	2	0	0	4	0	0	3	0	0	2	0	0	8	0	0	5	0
	18	16201561	T	<*>	0	18	0	0	12	0	0	2	0	0	4	0	0	3	0	0	2	0	0	7	0	0	5	0
	18	16201562	T	<*>	0	18	0	0	12	0	0	2	0	0	4	0	0	3	0	0	2	0	0	7	0	0	5	0
	18	16201563	G	<*>	0	18	0	0	12	0	0	2	0	0	4	0	0	3	0	0	2	0	0	7	0	0	5	0
	18	16201564	T	<*>	0	19	0	0	11	0	0	2	0	0	4	0	0	3	0	0	3	0	0	7	0	0	5	0
	18	16201565	C	<*>	0	20	0	0	11	0	0	2	0	0	5	0	0	3	0	0	4	0	0	7	0	0	5	0
	18	16201566	G	<*>	0	20	0	0	12	0	0	2	0	0	5	0	0	3	0	0	4	0	0	8	0	0	5	0
	18	16201567	T	<*>	0	20	0	0	12	0	0	2	0	0	5	0	0	3	0	0	4	0	0	7	0	0	5	0
	18	16201568	G	<*>	0	20	0	0	12	0	0	2	0	0	5	0	0	3	0	0	4	0	0	6	0	0	5	0
	18	16201569	C	<*>	0	20	0	0	12	0	0	2	0	0	5	0	0	3	0	0	5	0	0	6	0	0	5	0
	18	16201570	T	<*>	0	20	0	0	12	0	0	2	0	0	5	0	0	3	0	0	5	0	0	6	0	0	5	0
	18	16201571	T	<*>	0	19	0	0	12	0	0	2	0	0	5	0	0	3	0	0	5	0	0	6	0	0	5	0
	18	16201572	A	<*>	0	19	0	0	12	0	0	2	0	0	4	0	0	3	0	0	5	0	0	6	0	0	5	0
	18	16201573	T	<*>	0	19	0	0	12	0	0	1	0	0	4	0	0	3	0	0	5	0	0	6	0	0	3	0
	18	16201574	A	<*>	0	19	0	0	12	0	0	1	0	0	4	0	0	3	0	0	5	0	0	6	0	0	3	0
	18	16201575	G	<*>	0	20	0	0	13	0	0	1	0	0	4	0	0	3	0	0	5	0	0	6	0	0	4	0
	18	16201576	G	<*>	0	21	0	0	12	0	0	1	0	0	4	0	0	1	0	0	5	0	0	6	0	0	3	0
	18	16201577	A	<*>	0	21	0	0	12	0	0	1	0	0	4	0	0	1	0	0	4	0	0	6	0	0	3	0
	18	16201578	C	<*>	0	21	0	0	12	0	0	1	0	0	4	0	0	1	0	0	4	0	0	5	0	0	3	0
	18	16201579	C	<*>	0	21	0	0	13	0	0	1	0	0	4	0	0	1	0	0	4	0	0	5	0	0	3	0
	18	16201580	C	<*>	0	20	0	0	13	0	0	1	0	0	4	0	0	1	0	0	4	0	0	5	0	0	3	0
	18	16201581	A	<*>	0	20	0	0	12	0	0	1	0	0	4	0	0	1	0	0	4	0	0	5	0	0	3	0
	18	16201582	C	<*>	0	20	0	0	12	0	0	1	0	0	4	0	0	1	0	0	4	0	0	5	0	0	3	0
	18	16201583	C	<*>	0	21	0	0	12	0	0	1	0	0	4	0	0	1	0	0	4	0	0	5	0	0	3	0
	18	16201584	T	<*>	0	21	0	0	12	0	0	1	0	0	5	0	0	1	0	0	5	0	0	5	0	0	3	0
	18	16201585	C	<*>	0	21	0	0	12	0	0	1	0	0	5	0	0	1	0	0	4	0	0	5	0	0	3	0
	18	16201586	C	<*>	0	21	0	0	12	0	0	1	0	0	5	0	0	1	0	0	4	0	0	4	0	0	3	0
	18	16201587	A	<*>	0	22	0	0	12	0	0	1	0	0	5	0	0	1	0	0	4	0	0	4	0	0	3	0
	18	16201588	A	<*>	0	22	0	0	12	0	0	1	0	0	5	0	0	1	0	0	4	0	0	4	0	0	3	0
	18	16201589	A	<*>	0	22	0	0	12	0	0	1	0	0	5	0	0	1	0	0	4	0	0	4	0	0	3	0
	18	16201590	T	<*>	0	23	0	0	12	0	0	1	0	0	5	0	0	1	0	0	4	0	0	4	0	0	3	0
	18	16201591	T	<*>	0	23	0	0	13	0	0	1	0	0	5	0	0	1	0	0	4	0	0	4	0	0	3	0
	18	16201592	A	<*>	0	24	0	0	13	0	0	1	0	0	5	0	0	1	0	0	4	0	0	4	0	0	3	0
	18	16201593	A	<*>	0	24	0	0	12	0	0	1	0	0	5	0	0	1	0	0	4	0	0	4	0	0	3	0
	18	16201594	G	<*>	0	24	0	0	12	0	0	1	0	0	5	0	0	1	0	0	4	0	0	4	0	0	3	0
	18	16201596	G	<*>	0	25	0	0	11	0	0	1	0	0	5	0	0	1	0	0	4	0	0	4	0	0	3	0
	18	16201597	T	<*>	0	25	0	0	11	0	0	1	0	0	5	0	0	1	0	0	4	0	0	4	0	0	3	0
	18	16201598	C	<*>	0	26	0	0	10	0	0	1	0	0	5	0	0	3	0	0	4	0	0	4	0	0	3	0
	18	16201599	A	<*>	0	26	0	0	10	0	0	1	0	0	5	0	0	3	0	0	4	0	0	4	0	0	3	0
	18	16201600	A	<*>	0	26	0	0	10	0	0	1	0	0	5	0	0	3	0	0	4	0	0	4	0	0	3	0
	18	16201601	T	<*>	0	26	0	0	10	0	0	1	0	0	5	0	0	3	0	0	4	0	0	3	0	0	3	0
	18	16201602	T	<*>	0	26	0	0	10	0	0	1	0	0	5	0	0	3	0	0	4	0	0	3	0	0	3	0
	18	16201603	C	<*>	0	27	0	0	10	0	0	1	0	0	5	0	0	3	0	0	5	0	0	3	0	0	3	0
	18	16201604	T	<*>	0	27	0	0	10	0	0	1	0	0	5	0	0	3	0	0	5	0	0	4	0	0	2	0
	18	16201605	G	<*>	0	27	0	0	10	0	0	3	0	0	5	0	0	3	0	0	5	0	0	5	0	0	2	0
	18	16201606	T	<*>	0	25	0	0	10	0	0	3	0	0	5	0	0	3	0	0	5	0	0	5	0	0	3	0
	18	16201607	C	<*>	0	25	0	0	10	0	0	3	0	0	5	0	0	3	0	0	5	0	0	6	0	0	5	0
	18	16201608	A	<*>	0	25	0	0	10	0	0	2	0	0	5	0	0	3	0	0	5	0	0	6	0	0	6	0
	18	16201609	C	<*>	0	25	0	0	10	0	0	2	0	0	5	0	0	3	0	0	5	0	0	6	0	0	6	0
	18	16201610	A	<*>	0	25	0	0	10	0	0	2	0	0	5	0	0	3	0	0	5	0	0	6	0	0	6	0
	18	16201611	G	<*>	0	25	0	0	10	0	0	2	0	0	5	0	0	3	0	0	5	0	0	6	0	0	6	0
	18	16201612	T	<*>	0	25	0	0	10	0	0	2	0	0	5	0	0	3	0	0	5	0	0	6	0	0	6	0
	18	16201613	A	<*>	0	26	0	0	10	0	0	2	0	0	5	0	0	3	0	0	5	0	0	6	0	0	6	0
	18	16201614	T	<*>	0	26	0	0	10	0	0	2	0	0	5	0	0	3	0	0	5	0	0	6	0	0	6	0
	18	16201615	C	<*>	0	26	0	0	10	0	0	2	0	0	5	0	0	3	0	0	6	0	0	7	0	0	6	0
	18	16201616	A	<*>	0	27	0	0	10	0	0	2	0	0	5	0	0	3	0	0	6	0	0	7	0	0	6	0
	18	16201617	T	<*>	0	27	0	0	11	0	0	2	0	0	5	0	0	3	0	0	6	0	0	7	0	0	6	0
	18	16201618	T	<*>	0	27	0	0	13	0	0	2	0	0	5	0	0	3	0	0	6	0	0	7	0	0	6	0
	18	16201619	A	<*>	0	27	0	0	13	0	0	2	0	0	5	0	0	3	0	0	6	0	0	7	0	0	6	0
	18	16201620	A	<*>	0	27	0	0	13	0	0	2	0	0	4	0	0	3	0	0	6	0	0	7	0	0	6	0
	18	16201621	T	C	0	27	0	0	12	0	0	2	0	0	4	0	0	3	0	0	6	0	0	7	0	0	6	0
	18	16201622	T	<*>	0	27	0	0	12	0	0	2	0	0	4	0	0	3	0	0	6	0	0	7	0	0	6	0
	18	16201623	G	<*>	0	26	0	0	12	0	0	2	0	0	4	0	0	3	0	0	6	0	0	7	0	0	6	0
	18	16201624	C	<*>	0	26	0	0	12	0	0	2	0	0	4	0	0	3	0	0	6	0	0	7	0	0	6	0
	18	16201626	A	<*>	0	25	0	0	12	0	0	2	0	0	4	0	0	3	0	0	6	0	0	7	0	0	5	0
	18	16201627	T	<*>	0	25	0	0	13	0	0	2	0	0	4	0	0	3	0	0	6	0	0	7	0	0	4	0
	18	16201628	A	C	10	15	0.4	0	13	0	0	2	0	0	4	0	0	3	0	2	4	0.333333	3	4	0.428571	0	4	0
	18	16201629	A	<*>	0	24	0	0	13	0	0	2	0	0	4	0	0	3	0	0	6	0	0	7	0	0	4	0
	18	16201630	A	<*>	0	23	0	0	13	0	0	2	0	0	4	0	0	3	0	0	6	0	0	7	0	0	4	0
	18	16201631	T	<*>	0	23	0	0	13	0	0	2	0	0	4	0	0	3	0	0	6	0	0	7	0	0	4	0
	18	16201632	T	<*>	0	23	0	0	13	0	0	2	0	0	5	0	0	3	0	0	6	0	0	8	0	0	4	0
	18	16201633	T	<*>	0	23	0	0	13	0	0	2	0	0	5	0	0	4	0	0	7	0	0	8	0	0	4	0
	18	16201634	A	C	0	22	0	0	13	0	0	2	0	0	5	0	0	4	0	0	7	0	0	8	0	0	4	0
	18	16201635	T	<*>	0	22	0	0	13	0	0	2	0	0	4	0	0	4	0	0	7	0	0	10	0	0	4	0
	18	16201636	C	<*>	0	22	0	0	13	0	0	3	0	0	4	0	0	3	0	0	9	0	0	12	0	0	4	0
	18	16201637	T	<*>	0	21	0	0	13	0	0	3	0	0	4	0	0	3	0	0	9	0	0	13	0	0	4	0
	18	16201638	C	<*>	0	21	0	0	13	0	0	3	0	0	4	0	0	3	0	0	10	0	0	16	0	0	4	0
	18	16201639	G	<*>	0	21	0	0	13	0	0	3	0	0	4	0	0	3	0	0	10	0	0	16	0	0	4	0
	18	16201640	A	<*>	0	21	0	0	13	0	0	3	0	0	4	0	0	3	0	0	10	0	0	15	0	0	4	0
	18	16201641	A	<*>	0	21	0	0	13	0	0	3	0	0	4	0	0	3	0	0	10	0	0	15	0	0	4	0
	18	16201642	G	<*>	0	21	0	0	13	0	0	3	0	0	4	0	0	3	0	0	11	0	0	15	0	0	4	0
	18	16201643	C	<*>	0	22	0	0	12	0	0	3	0	0	4	0	0	3	0	0	11	0	0	15	0	0	4	0
	18	16201644	A	<*>	0	21	0	0	12	0	0	3	0	0	4	0	0	3	0	0	12	0	0	15	0	0	4	0
	18	16201645	G	<*>	0	21	0	0	12	0	0	4	0	0	4	0	0	3	0	0	12	0	0	16	0	0	4	0
	18	16201646	C	<*>	0	20	0	0	12	0	0	4	0	0	4	0	0	3	0	0	12	0	0	16	0	0	4	0
	18	16201647	C	<*>	0	20	0	0	10	0	0	5	0	0	4	0	0	3	0	0	12	0	0	16	0	0	4	0
	18	16201648	A	<*>	0	20	0	0	10	0	0	5	0	0	4	0	0	3	0	0	12	0	0	16	0	0	4	0
	18	16201649	G	<*>	0	20	0	0	10	0	0	5	0	0	3	0	0	3	0	0	12	0	0	16	0	0	4	0
	18	16201650	A	<*>	0	21	0	0	10	0	0	5	0	0	3	0	0	3	0	0	11	0	0	16	0	0	4	0
	18	16201651	A	<*>	0	20	0	0	10	0	0	5	0	0	3	0	0	3	0	0	10	0	0	15	0	0	4	0
	18	16201652	CTCG	TTCA	0	20	0	0	9	0	1	4	0.2	1	2	0.333333	1	2	0.333333	3	6	0.333333	4	11	0.266667	0	4	0
	18	16201656	T	<*>	0	21	0	0	11	0	0	5	0	0	3	0	0	3	0	0	9	0	0	15	0	0	3	0
	18	16201657	T	<*>	0	21	0	0	11	0	0	5	0	0	4	0	0	3	0	0	9	0	0	15	0	0	3	0
	18	16201658	G	<*>	0	21	0	0	11	0	0	5	0	0	4	0	0	3	0	0	9	0	0	15	0	0	3	0
	18	16201659	A	<*>	0	21	0	0	12	0	0	5	0	0	4	0	0	3	0	0	9	0	0	15	0	0	3	0
	18	16201660	A	<*>	0	21	0	0	13	0	0	5	0	0	4	0	0	3	0	0	9	0	0	15	0	0	3	0
	18	16201661	G	<*>	0	21	0	0	13	0	0	5	0	0	4	0	0	3	0	0	9	0	0	15	0	0	3	0
	18	16201662	A	<*>	0	22	0	0	13	0	0	5	0	0	4	0	0	3	0	0	9	0	0	15	0	0	3	0
	18	16201663	A	<*>	0	22	0	0	13	0	0	5	0	0	4	0	0	3	0	0	9	0	0	15	0	0	3	0
	18	16201664	T	<*>	0	22	0	0	13	0	0	5	0	0	4	0	0	3	0	0	9	0	0	15	0	0	3	0
	18	16201665	A	<*>	0	23	0	0	13	0	0	5	0	0	5	0	0	3	0	0	9	0	0	15	0	0	3	0
	18	16201666	G	T	0	23	0	0	13	0	1	4	0.2	1	4	0.2	1	2	0.333333	3	6	0.333333	4	11	0.266667	0	3	0
	18	16201667	G	<*>	0	22	0	0	13	0	0	5	0	0	5	0	0	3	0	0	9	0	0	15	0	0	3	0
	18	16201668	G	<*>	0	22	0	0	12	0	0	5	0	0	5	0	0	3	0	0	9	0	0	15	0	0	3	0
	18	16201669	T	<*>	0	22	0	0	12	0	0	5	0	0	7	0	0	4	0	0	9	0	0	15	0	0	3	0
	18	16201670	G	<*>	0	23	0	0	12	0	0	5	0	0	6	0	0	4	0	0	8	0	0	16	0	0	3	0
	18	16201671	G	<*>	0	23	0	0	12	0	0	5	0	0	7	0	0	4	0	0	8	0	0	16	0	0	3	0
	18	16201672	G	<*>	0	23	0	0	12	0	0	5	0	0	7	0	0	4	0	0	8	0	0	17	0	0	3	0
	18	16201673	G	<*>	0	23	0	0	12	0	0	5	0	0	7	0	0	4	0	0	8	0	0	17	0	0	3	0
	18	16201674	A	<*>	0	23	0	0	12	0	0	5	0	0	7	0	0	4	0	0	8	0	0	17	0	0	3	0
	18	16201675	A	<*>	0	24	0	0	11	0	0	5	0	0	7	0	0	4	0	0	8	0	0	17	0	0	3	0
	18	16201676	G	<*>	0	24	0	0	11	0	0	5	0	0	7	0	0	4	0	0	8	0	0	17	0	0	3	0
	18	16201677	T	<*>	0	24	0	0	12	0	0	5	0	0	7	0	0	4	0	0	8	0	0	17	0	0	3	0
	18	16201678	A	<*>	0	24	0	0	12	0	0	5	0	0	7	0	0	4	0	0	8	0	0	17	0	0	3	0
	18	16201679	A	<*>	0	25	0	0	12	0	0	5	0	0	7	0	0	4	0	0	8	0	0	17	0	0	3	0
	18	16201680	T	<*>	0	25	0	0	12	0	0	5	0	0	7	0	0	4	0	0	8	0	0	17	0	0	3	0
	18	16201681	T	<*>	0	25	0	0	13	0	0	5	0	0	7	0	0	4	0	0	8	0	0	17	0	0	3	0
	18	16201682	C	<*>	0	25	0	0	14	0	0	5	0	0	7	0	0	4	0	0	8	0	0	17	0	0	3	0
	18	16201683	C	<*>	0	25	0	0	14	0	0	5	0	0	7	0	0	4	0	0	8	0	0	17	0	0	3	0
	18	16201684	C	<*>	0	25	0	0	14	0	0	5	0	0	7	0	0	2	0	0	8	0	0	17	0	0	3	0
	18	16201685	T	G	0	25	0	0	14	0	1	4	0.2	1	6	0.142857	1	1	0.5	3	5	0.375	4	12	0.25	0	3	0
	18	16201686	G	<*>	0	24	0	0	14	0	0	5	0	0	7	0	0	2	0	0	8	0	0	17	0	0	3	0
	18	16201687	A	<*>	0	24	0	0	14	0	0	5	0	0	7	0	0	2	0	0	8	0	0	17	0	0	3	0
	18	16201688	A	<*>	0	23	0	0	14	0	0	5	0	0	7	0	0	2	0	0	8	0	0	16	0	0	3	0
	18	16201689	G	<*>	0	23	0	0	14	0	0	5	0	0	7	0	0	2	0	0	7	0	0	15	0	0	3	0
	18	16201690	T	<*>	0	22	0	0	13	0	0	4	0	0	7	0	0	2	0	0	7	0	0	15	0	0	3	0
	18	16201691	A	<*>	0	22	0	0	13	0	0	2	0	0	7	0	0	2	0	0	7	0	0	14	0	0	3	0
	18	16201692	G	<*>	0	22	0	0	13	0	0	3	0	0	7	0	0	2	0	0	7	0	0	13	0	0	2	0
	18	16201693	G	<*>	0	22	0	0	13	0	0	3	0	0	7	0	0	2	0	0	7	0	0	13	0	0	0
	18	16201694	C	<*>	0	22	0	0	13	0	0	3	0	0	7	0	0	2	0	0	9	0	0	13	0	0	1	0
	18	16201695	T	<*>	0	22	0	0	13	0	0	3	0	0	7	0	0	2	0	0	9	0	0	13	0	0	1	0
	18	16201696	C	<*>	0	22	0	0	13	0	0	3	0	0	7	0	0	2	0	0	9	0	0	13	0	0	1	0
	18	16201697	A	<*>	0	22	0	0	13	0	0	3	0	0	7	0	0	2	0	0	9	0	0	13	0	0	1	0
	18	16201698	A	<*>	0	22	0	0	13	0	0	3	0	0	7	0	0	2	0	0	9	0	0	13	0	0	1	0
	18	16201699	C	<*>	0	23	0	0	13	0	0	3	0	0	7	0	0	2	0	0	9	0	0	13	0	0	1	0
	18	16201700	A	<*>	0	22	0	0	12	0	0	3	0	0	7	0	0	2	0	0	9	0	0	13	0	0	1	0
	18	16201701	T	<*>	0	22	0	0	12	0	0	3	0	0	7	0	0	2	0	0	8	0	0	12	0	0	1	0
	18	16201702	T	<*>	0	23	0	0	12	0	0	3	0	0	7	0	0	2	0	0	8	0	0	12	0	0	1	0
	18	16201703	C	<*>	0	23	0	0	12	0	0	3	0	0	7	0	0	2	0	0	8	0	0	12	0	0	1	0
	18	16201704	A	<*>	0	23	0	0	12	0	0	3	0	0	7	0	0	2	0	0	8	0	0	12	0	0	1	0
	18	16201705	A	<*>	0	23	0	0	12	0	0	3	0	0	7	0	0	2	0	0	8	0	0	12	0	0	1	0
	18	16201706	G	A	0	23	0	7	5	0.583333	0	3	0	0	7	0	0	2	0	0	8	0	0	12	0	0	1	0
	18	16201707	T	<*>	0	22	0	0	12	0	0	3	0	0	7	0	0	2	0	0	8	0	0	12	0	0	1	0
	18	16201708	C	<*>	0	24	0	0	12	0	0	0		0	0		0	0		0	0		0	0		0	0
	18	16201709	T	<*>	0	23	0	0	12	0	0	0		0	0		0	0		0	0		0	0		0	0
	18	16201710	G	<*>	0	24	0	0	12	0	0	0		0	0		0	0		0	0		0	0		0	0
	18	16201711	C	<*>	0	26	0	0	12	0	0	0		0	0		0	0		0	0		0	0		0	0
	18	16201712	A	<*>	0	25	0	0	13	0	0	0		0	0		0	0		0	0		0	0		0	0
	18	16201713	T	<*>	0	22	0	0	13	0	0	0		0	0		0	0		0	0		0	0		0	0
	18	16201714	A	<*>	0	21	0	0	14	0	0	0		0	0		0	0		0	0		0	0		0	0
	18	16201715	T	<*>	0	21	0	0	13	0	0	0		0	0		0	0		0	0		0	0		0	0
	18	16201716	C	<*>	0	22	0	0	13	0	0	0		0	0		0	0		0	0		0	0		0	0
	18	16201717	T	<*>	0	22	0	0	13	0	0	0		0	0		0	0		0	0		0	0		0	0
	18	16201718	G	A	13	9	0.590909	6	7	0.461538	0	0		0	0		0	0		0	0		0	0		0	0
	18	16201719	A	<*>	0	23	0	0	13	0	0	0		0	0		0	0		0	0		0	0		0	0
	18	16201720	A	<*>	0	20	0	0	13	0	0	0		0	0		0	0		0	0		0	0		0	0
	18	16201721	G	<*>	0	21	0	0	13	0	0	0		0	0		0	0		0	0		0	0		0	0
	18	16201722	T	<*>	0	20	0	0	13	0	0	0		0	0		0	0		0	0		0	0		0	0
	18	16201723	C	<*>	0	20	0	0	13	0	0	0		0	0		0	0		0	0		0	0		0	0
	18	16201724	A	<*>	0	21	0	0	13	0	0	0		0	0		0	0		0	0		0	0		0	0
	18	16201725	A	<*>	0	21	0	0	13	0	0	0		0	0		0	0		0	0		0	0		0	0
	18	16201726	G	<*>	0	21	0	0	13	0	0	0		0	0		0	0		0	0		0	0		0	0
	18	16201727	A	<*>	0	21	0	0	13	0	0	0		0	0		0	0		0	0		0	0		0	0
	18	16201728	A	<*>	0	21	0	0	13	0	0	0		0	0		0	0		0	0		0	0		0	0
	18	16201729	C	<*>	0	21	0	0	13	0	0	0		0	0		0	0		0	0		0	0		0	0
	18	16201730	T	<*>	0	21	0	0	13	0	0	0		0	0		0	0		0	0		0	0		0	0
	18	16201731	C	<*>	0	21	0	0	14	0	0	0		0	0		0	0		0	0		0	0		0	0
	18	16201732	A	<*>	0	21	0	0	14	0	0	0		0	0		0	0		0	0		0	0		0	0
	18	16201733	A	<*>	0	21	0	0	15	0	0	0		0	0		0	0		0	0		0	0		0	0
	18	16201734	A	<*>	0	21	0	0	15	0	0	0		0	0		0	0		0	0		0	0		0	0
	18	16201735	G	<*>	0	21	0	0	15	0	0	0		0	0		0	0		0	0		0	0		0	0
	18	16201736	C	<*>	0	21	0	0	15	0	0	0		0	0		0	0		0	0		0	0		0	0
	18	16201737	C	<*>	0	21	0	0	15	0	0	0		0	0		0	0		0	0		0	0		0	0
	18	16201738	A	<*>	0	21	0	0	15	0	0	0		0	0		0	0		0	0		0	0		0	0
	18	16201739	A	<*>	0	21	0	0	15	0	0	0		0	0		0	0		0	0		0	0		0	0
	18	16201740	A	<*>	0	22	0	0	15	0	0	0		0	0		0	0		0	0		0	0		0	0
	18	16201741	G	<*>	0	22	0	0	15	0	0	0		0	0		0	0		0	0		0	0		0	0
	18	16201742	T	<*>	0	22	0	0	14	0	0	0		0	0		0	0		0	0		0	0		0	0
	18	16201743	G	<*>	0	22	0	0	12	0	0	0		0	0		0	0		0	0		0	0		0	0
	18	16201744	A	<*>	0	21	0	0	12	0	0	0		0	0		0	0		0	0		0	0		0	0
	18	16201745	C	<*>	0	21	0	0	12	0	0	0		0	0		0	0		0	0		0	0		0	0
	18	16201746	A	<*>	0	22	0	0	12	0	0	0		0	0		0	0		0	0		0	0		0	0
	18	16201747	A	<*>	0	22	0	0	12	0	0	0		0	0		0	0		0	0		0	0		0	0
	18	16201748	C	<*>	0	23	0	0	12	0	0	0		0	0		0	0		0	0		0	0		0	0
	18	16201749	A	<*>	0	24	0	0	12	0	0	0		0	0		0	0		0	0		0	0		0	0
	18	16201750	T	C	10	14	0.416667	0	13	0	0	0		0	0		0	0		0	0		0	0		0	0
	18	16201751	G	<*>	0	24	0	0	12	0	0	0		0	0		0	0		0	0		0	0		0	0
	18	16201752	A	<*>	0	24	0	0	13	0	0	0		0	0		0	0		0	0		0	0		0	0
	18	16201753	T	<*>	0	24	0	0	13	0	0	0		0	0		0	0		0	0		0	0		0	0
	18	16201754	A	<*>	0	24	0	0	13	0	0	0		0	0		0	0		0	0		0	0		0	0
	18	16201755	G	<*>	0	24	0	0	14	0	0	0		0	0		0	0		0	0		0	0		0	0
	18	16201756	T	<*>	0	24	0	0	14	0	0	0		0	0		0	0		0	0		0	0		0	0
	18	16201757	T	<*>	0	22	0	0	14	0	0	0		0	0		0	0		0	0		0	0		0	0
	18	16201758	T	<*>	0	22	0	0	14	0	0	0		0	0		0	0		0	0		0	0		0	0
	18	16201759	T	<*>	0	22	0	0	14	0	0	0		0	0		0	0		0	0		0	0		0	0
	18	16201760	T	<*>	0	22	0	0	14	0	0	0		0	0		0	0		0	0		0	0		0	0
	18	16201761	A	<*>	0	22	0	0	14	0	0	0		0	0		0	0		0	0		0	0		0	0
	18	16201762	T	<*>	0	22	0	0	15	0	0	0		0	0		0	0		0	0		0	0		0	0
	18	16201763	T	<*>	0	22	0	0	15	0	0	0		0	0		0	0		0	0		0	0		0	0
	18	16201764	T	<*>	0	22	0	0	15	0	0	0		0	0		0	0		0	0		0	0		0	0
	18	16201765	T	<*>	0	22	0	0	15	0	0	0		0	0		0	0		0	0		0	0		0	0
	18	16201766	G	<*>	0	22	0	0	15	0	0	0		0	0		0	0		0	0		0	0		0	0
	18	16201767	A	<*>	0	21	0	0	15	0	0	0		0	0		0	0		0	0		0	0		0	0
	18	16201768	C	<*>	0	22	0	0	15	0	0	0		0	0		0	0		0	0		0	0		0	0
	18	16201769	A	<*>	0	22	0	0	15	0	0	0		0	0		0	0		0	0		0	0		0	0
	18	16201770	C	A	0	22	0	0	15	0	0	0		0	0		0	0		0	0		0	0		0	0
	18	16201771	G	<*>	0	22	0	0	15	0	0	0		0	0		0	0		0	0		0	0		0	0
	18	16201772	A	<*>	0	22	0	0	15	0	0	0		0	0		0	0		0	0		0	0		0	0
	18	16201773	A	<*>	0	22	0	0	14	0	0	0		0	0		0	0		0	0		0	0		0	0
	18	16201774	T	<*>	0	21	0	0	14	0	0	0		0	0		0	0		0	0		0	0		0	0
	18	16201775	G	<*>	0	21	0	0	14	0	0	0		0	0		0	0		0	0		0	0		0	0
	18	16201776	C	<*>	0	22	0	0	14	0	0	0		0	0		0	0		0	0		0	0		0	0
	18	16201777	T	<*>	0	23	0	0	13	0	0	0		0	0		0	0		0	0		0	0		0	0
	18	16201778	G	<*>	0	23	0	0	13	0	0	0		0	0		0	0		0	0		0	0		0	0
	18	16201779	T	<*>	0	23	0	0	13	0	0	0		0	0		0	0		0	0		0	0		0	0
	18	16201780	A	<*>	0	23	0	0	13	0	0	0		0	0		0	0		0	0		0	0		0	0
	18	16201781	G	<*>	0	25	0	0	12	0	0	0		0	0		0	0		0	0		0	0		0	0
	18	16201782	C	<*>	0	24	0	0	13	0	0	0		0	0		0	0		0	0		0	0		0	0
	18	16201783	A	<*>	0	25	0	0	13	0	0	0		0	0		0	0		0	0		0	0		0	0
	18	16201784	A	<*>	0	25	0	0	13	0	0	0		0	0		0	0		0	0		0	0		0	0
	18	16201785	G	<*>	0	24	0	0	14	0	0	0		0	0		0	0		0	0		0	0		0	0
	18	16201786	C	<*>	0	25	0	0	15	0	0	0		0	0		0	0		0	0		0	0		0	0
	18	16201787	T	<*>	0	25	0	0	15	0	0	0		0	0		0	0		0	0		0	0		0	0
	18	16201788	T	<*>	0	25	0	0	15	0	0	0		0	0		0	0		0	0		0	0		0	0
	18	16201789	A	<*>	0	24	0	0	15	0	0	0		0	0		0	0		0	0		0	0		0	0
	18	16201790	G	<*>	0	24	0	0	15	0	0	0		0	0		0	0		0	0		0	0		0	0
	18	16201792	A	<*>	0	24	0	0	16	0	0	0		0	0		0	0		0	0		0	0		0	0
	18	16201793	G	<*>	0	24	0	0	16	0	0	0		0	0		0	0		0	0		0	0		0	0
	18	16201794	C	<*>	0	24	0	0	16	0	0	0		0	0		0	0		0	0		0	0		0	0
	18	16201795	C	<*>	0	24	0	0	16	0	0	0		0	0		0	0		0	0		0	0		0	0
	18	16201796	A	<*>	0	24	0	0	16	0	0	0		0	0		0	0		0	0		0	0		0	0
	18	16201797	C	<*>	0	24	0	0	16	0	0	0		0	0		0	0		0	0		0	0		0	0
	18	16201798	A	<*>	0	24	0	0	16	0	0	0		0	0		0	0		0	0		0	0		0	0
	18	16201799	T	<*>	0	23	0	0	17	0	0	0		0	0		0	0		0	0		0	0		0	0
	18	16201800	C	<*>	0	23	0	0	17	0	0	0		0	0		0	0		0	0		0	0		0	0
	18	16201801	A	<*>	0	23	0	0	16	0	0	0		0	0		0	0		0	0		0	0		0	0
	18	16201802	A	<*>	0	23	0	0	16	0	0	0		0	0		0	0		0	0		0	0		0	0
	18	16201803	A	<*>	0	23	0	0	16	0	0	0		0	0		0	0		0	0		0	0		0	0
	18	16201804	A	<*>	0	22	0	0	17	0	0	0		0	0		0	0		0	0		0	0		0	0
	18	16201805	G	<*>	0	22	0	0	16	0	0	0		0	0		0	0		0	0		0	0		0	0
	18	16201806	C	<*>	0	22	0	0	15	0	0	0		0	0		0	0		0	0		0	0		0	0
	18	16201807	A	<*>	0	22	0	0	15	0	0	0		0	0		0	0		0	0		0	0		0	0
	18	16201808	T	<*>	0	23	0	0	15	0	0	0		0	0		0	0		0	0		0	0		0	0
	18	16201809	G	<*>	0	23	0	0	15	0	0	0		0	0		0	0		0	0		0	0		0	0
	18	16201810	C	<*>	0	23	0	0	15	0	0	0		0	0		0	0		0	0		0	0		0	0
	18	16201811	C	<*>	0	23	0	0	15	0	0	0		0	0		0	0		0	0		0	0		0	0
	18	16201812	A	<*>	0	23	0	0	15	0	0	0		0	0		0	0		0	0		0	0		0	0
	18	16201813	T	<*>	0	23	0	0	15	0	0	0		0	0		0	0		0	0		0	0		0	0
	18	16201814	A	<*>	0	23	0	0	15	0	0	0		0	0		0	0		0	0		0	0		0	0
	18	16201815	A	<*>	0	24	0	0	15	0	0	0		0	0		0	0		0	0		0	0		0	0
	18	16201816	T	<*>	0	24	0	0	15	0	0	0		0	0		0	0		0	0		0	0		0	0
	18	16201817	T	<*>	0	23	0	0	15	0	0	0		0	0		0	0		0	0		0	0		0	0
	18	16201818	T	<*>	0	24	0	0	16	0	0	0		0	0		0	0		0	0		0	0		0	0
	18	16201819	T	<*>	0	24	0	0	16	0	0	0		0	0		0	0		0	0		0	0		0	0
	18	16201820	G	<*>	0	24	0	0	16	0	0	0		0	0		0	0		0	0		0	0		0	0
	18	16201821	T	<*>	0	24	0	0	16	0	0	0		0	0		0	0		0	0		0	0		0	0
	18	16201822	T	<*>	0	23	0	0	17	0	0	0		0	0		0	0		0	0		0	0		0	1	0
	18	16201823	T	<*>	0	23	0	0	17	0	0	0		0	0		0	0		0	0		0	0		0	1	0
	18	16201824	T	<*>	0	22	0	0	17	0	0	0		0	0		0	0		0	0		0	0		0	1	0
	18	16201825	G	<*>	0	22	0	0	18	0	0	0		0	0		0	0		0	0		0	0		0	1	0
	18	16201826	A	<*>	0	23	0	0	18	0	0	0		0	0		0	0		0	0		0	0		0	1	0
	18	16201827	A	<*>	0	24	0	0	18	0	0	0		0	0		0	0		0	0		0	0		0	1	0
	18	16201828	C	<*>	0	24	0	0	18	0	0	0		0	0		0	0		0	0		0	0		0	1	0
	18	16201829	A	<*>	0	24	0	0	18	0	0	0		0	0		0	0		0	0		0	0		0	1	0
	18	16201830	T	<*>	0	24	0	0	18	0	0	0		0	0		0	0		0	0		0	0		0	1	0
	18	16201831	A	<*>	0	24	0	0	18	0	0	0		0	0		0	0		0	0		0	0		0	1	0
	18	16201832	A	<*>	0	23	0	0	18	0	0	0		0	0		0	0		0	0		0	0		0	1	0
	18	16201833	C	<*>	0	23	0	0	18	0	0	0		0	0		0	0		0	0		0	0		0	1	0
	18	16201834	C	<*>	0	24	0	0	18	0	0	0		0	0		0	0		0	0		0	0		0	1	0
	18	16201835	C	<*>	0	23	0	0	18	0	0	0		0	0		0	0		0	0		0	0		0	1	0
	18	16201836	T	<*>	0	23	0	0	18	0	0	0		0	0		0	0		0	0		0	0		0	1	0
	18	16201837	T	<*>	0	23	0	0	18	0	0	0		0	0		0	0		0	0		0	0		0	1	0
	18	16201838	T	C	0	23	0	9	8	0.529412	0	0		0	0		0	0		0	0		0	0		0	1	0
	18	16201839	G	A	0	22	0	0	17	0	0	0		0	0		0	0		0	0		0	0		0	1	0
	18	16201840	C	<*>	0	21	0	0	17	0	0	0		0	0		0	0		0	0		0	0		0	1	0
	18	16201841	T	<*>	0	21	0	0	17	0	0	0		0	0		0	0		0	0		0	0		0	1	0
	18	16201842	A	<*>	0	20	0	0	17	0	0	0		0	0		0	0		0	0		0	0		0	1	0
	18	16201843	C	<*>	0	20	0	0	17	0	0	0		0	0		0	0		0	0		0	0		0	1	0
	18	16201844	T	<*>	0	20	0	0	17	0	0	0		0	0		0	0		0	0		0	0		0	1	0
	18	16201845	T	<*>	0	19	0	0	17	0	0	0		0	0		0	0		0	0		0	0		0	1	0
	18	16201846	T	<*>	0	19	0	0	17	0	0	0		0	0		0	0		0	0		0	0		0	1	0
	18	16201847	T	<*>	0	20	0	0	18	0	0	0		0	0		0	0		0	0		0	0		0	1	0
	18	16201848	A	<*>	0	19	0	0	18	0	0	0		0	0		0	0		0	0		0	0		0	1	0
	18	16201849	T	A	0	19	0	0	18	0	0	0		0	0		0	0		0	0		0	0		0	1	0
	18	16201850	A	<*>	0	19	0	0	18	0	0	0		0	0		0	0		0	0		0	0		0	1	0
	18	16201851	T	<*>	0	19	0	0	18	0	0	0		0	0		0	0		0	0		0	0		0	1	0
	18	16201852	A	<*>	0	19	0	0	18	0	0	0		0	0		0	0		0	0		0	0		0	1	0
	18	16201853	T	<*>	0	19	0	0	19	0	0	0		0	0		0	0		0	0		0	0		0	1	0
	18	16201854	T	<*>	0	19	0	0	19	0	0	0		0	0		0	0		0	0		0	0		0	1	0
	18	16201855	T	<*>	0	19	0	0	18	0	0	0		0	0		0	0		0	0		0	0		0	1	0
	18	16201856	A	<*>	0	19	0	0	20	0	0	0		0	0		0	0		0	0		0	0		0	1	0
	18	16201857	T	<*>	0	19	0	0	20	0	0	0		0	0		0	0		0	0		0	0		0	1	0
	18	16201858	T	<*>	0	19	0	0	19	0	0	0		0	0		0	0		0	0		0	0		0	1	0
	18	16201859	G	<*>	0	20	0	0	19	0	0	0		0	0		0	0		0	0		0	0		0	1	0
	18	16201860	C	<*>	0	21	0	0	19	0	0	0		0	0		0	0		0	0		0	0		0	1	0
	18	16201861	C	<*>	0	21	0	0	19	0	0	0		0	0		0	0		0	0		0	0		0	1	0
	18	16201862	A	<*>	0	21	0	0	19	0	0	0		0	0		0	0		0	0		0	0		0	1	0
	18	16201863	T	<*>	0	21	0	0	19	0	0	0		0	0		0	0		0	0		0	0		0	1	0
	18	16201864	C	<*>	0	21	0	0	19	0	0	0		0	0		0	0		0	0		0	0		0	1	0
	18	16201865	A	<*>	0	20	0	0	19	0	0	0		0	0		0	0		0	0		0	0		0	1	0
	18	16201866	A	T	0	20	0	8	11	0.421053	0	0		0	0		0	0		0	0		0	0		0	1	0
	18	16201867	C	<*>	0	20	0	0	19	0	0	0		0	0		0	0		0	0		0	0		0	1	0
	18	16201868	T	<*>	0	20	0	0	19	0	0	0		0	0		0	0		0	0		0	0		0	1	0
	18	16201869	G	<*>	0	21	0	0	19	0	0	0		0	0		0	0		0	0		0	0		0	1	0
	18	16201870	T	<*>	0	21	0	0	19	0	0	0		0	0		0	0		0	0		0	0		0	1	0
	18	16201871	A	<*>	0	21	0	0	19	0	0	0		0	0		0	0		0	0		0	0		0	1	0
	18	16201872	C	<*>	0	21	0	0	19	0	0	0		0	0		0	0		0	0		0	0		0	1	0
	18	16201873	A	<*>	0	19	0	0	19	0	0	0		0	0		0	0		0	0		0	0		0	1	0
	18	16201874	A	<*>	0	19	0	0	18	0	0	0		0	0		0	0		0	0		0	0		0	1	0
	18	16201875	T	<*>	0	18	0	0	18	0	0	0		0	0		0	0		0	0		0	0		0	1	0
	18	16201876	A	<*>	0	18	0	0	17	0	0	0		0	0		0	0		0	0		0	0		0	1	0
	18	16201877	T	<*>	0	18	0	0	17	0	0	0		0	0		0	0		0	0		0	0		0	1	0
	18	16201878	A	<*>	0	18	0	0	17	0	0	0		0	0		0	0		0	0		0	0		0	1	0
	18	16201879	T	<*>	0	19	0	0	16	0	0	0		0	0		0	0		0	0		0	0		0	1	0
	18	16201880	G	<*>	0	19	0	0	17	0	0	0		0	0		0	0		0	0		0	0		0	1	0
	18	16201881	T	<*>	0	18	0	0	17	0	0	0		0	0		0	0		0	0		0	0		0	1	0
	18	16201882	G	<*>	0	18	0	0	17	0	0	0		0	0		0	0		0	0		0	0		0	1	0
	18	16201883	C	<*>	0	19	0	0	17	0	0	0		0	0		0	0		0	0		0	0		0	1	0
	18	16201884	A	<*>	0	19	0	0	17	0	0	0		0	0		0	0		0	0		0	0		0	1	0
	18	16201885	C	<*>	0	21	0	0	17	0	0	0		0	0		0	0		0	0		0	0		0	1	0
	18	16201886	A	<*>	0	21	0	0	17	0	0	0		0	0		0	0		0	0		0	0		0	1	0
	18	16201887	A	<*>	0	21	0	0	17	0	0	0		0	0		0	0		0	0		0	0		0	1	0
	18	16201888	G	<*>	0	21	0	0	17	0	0	0		0	0		0	0		0	0		0	0		0	1	0
	18	16201889	A	<*>	0	22	0	0	17	0	0	0		0	0		0	0		0	0		0	0		0	1	0
	18	16201890	T	<*>	0	22	0	0	17	0	0	0		0	0		0	0		0	0		0	0		0	1	0
	18	16201891	A	<*>	0	22	0	0	17	0	0	0		0	0		0	0		0	0		0	0		0	1	0
	18	16201892	T	<*>	0	22	0	0	17	0	0	0		0	0		0	0		0	0		0	0		0	1	0
	18	16201893	A	<*>	0	21	0	0	17	0	0	0		0	0		0	0		0	0		0	0		0	1	0
	18	16201894	G	<*>	0	21	0	0	17	0	0	0		0	0		0	0		0	0		0	0		0	1	0
	18	16201895	T	<*>	0	21	0	0	17	0	0	0		0	0		0	0		0	0		0	0		0	1	0
	18	16201896	G	<*>	0	20	0	0	17	0	0	0		0	0		0	0		0	0		0	0		0	1	0
	18	16201897	T	<*>	0	20	0	0	17	0	0	0		0	0		0	0		0	0		0	0		0	1	0
	18	16201898	A	<*>	0	19	0	0	17	0	0	0		0	0		0	0		0	0		0	0		0	1	0
	18	16201899	A	<*>	0	20	0	0	17	0	0	0		0	0		0	0		0	0		0	0		0	1	0
	18	16201900	T	<*>	0	20	0	0	17	0	0	0		0	0		0	0		0	0		0	0		0	1	0
	18	16201901	T	<*>	0	19	0	0	17	0	0	0		0	0		0	0		0	0		0	0		0	1	0
	18	16201902	G	<*>	0	19	0	0	18	0	0	0		0	0		0	0		0	0		0	0		0	1	0
	18	16201903	T	<*>	0	20	0	0	18	0	0	0		0	0		0	0		0	0		0	0		0	1	0
	18	16201904	A	<*>	0	20	0	0	18	0	0	0		0	0		0	0		0	0		0	0		0	1	0
	18	16201905	C	<*>	0	21	0	0	19	0	0	0		0	0		0	1	0	0	0		0	0		0	1	0
	18	16201906	A	<*>	0	20	0	0	17	0	0	0		0	0		0	1	0	0	0		0	0		0	1	0
	18	16201907	G	<*>	0	20	0	0	17	0	0	0		0	0		0	1	0	0	0		0	0		0	0
	18	16201908	T	C	10	10	0.5	9	8	0.529412	0	0		0	0		0	1	0	0	0		0	0		0	0
	18	16201909	G	<*>	0	20	0	0	16	0	0	0		0	0		0	1	0	0	0		0	0		0	0
	18	16201910	A	<*>	0	20	0	0	15	0	0	0		0	0		0	1	0	0	0		0	0		0	0
	18	16201911	G	<*>	0	19	0	0	15	0	0	0		0	0		0	1	0	0	0		0	0		0	0
	18	16201912	T	<*>	0	19	0	0	15	0	0	0		0	0		0	1	0	0	0		0	0		0	0
	18	16201913	C	<*>	0	19	0	0	15	0	0	0		0	0		0	1	0	0	0		0	0		0	0
	18	16201914	A	<*>	0	19	0	0	15	0	0	0		0	0		0	1	0	0	0		0	0		0	0
	18	16201915	T	<*>	0	19	0	0	15	0	0	0		0	0		0	1	0	0	0		0	0		0	0
	18	16201916	T	<*>	0	19	0	0	15	0	0	0		0	0		0	1	0	0	0		0	0		0	0
	18	16201917	T	<*>	0	19	0	0	15	0	0	0		0	0		0	1	0	0	0		0	0		0	0
	18	16201918	A	<*>	0	19	0	0	14	0	0	0		0	0		0	1	0	0	0		0	0		0	0
	18	16201919	T	<*>	0	19	0	0	14	0	0	0		0	0		0	1	0	0	0		0	0		0	0
	18	16201920	G	<*>	0	19	0	0	14	0	0	0		0	0		0	1	0	0	0		0	0		0	0
	18	16201921	T	<*>	0	20	0	0	14	0	0	0		0	0		0	1	0	0	0		0	0		0	0
	18	16201922	T	<*>	0	20	0	0	14	0	0	0		0	0		0	1	0	0	0		0	0		0	0
	18	16201923	T	A	0	20	0	0	13	0	0	0		0	0		0	1	0	0	0		0	0		0	0
	18	16201924	G	<*>	0	20	0	0	13	0	0	0		0	0		0	1	0	0	0		0	0		0	0
	18	16201925	C	<*>	0	20	0	0	13	0	0	0		0	0		0	1	0	0	0		0	0		0	0
	18	16201926	A	<*>	0	20	0	0	13	0	0	0		0	0		0	1	0	0	0		0	0		0	0
	18	16201927	C	<*>	0	21	0	0	14	0	0	0		0	0		0	1	0	0	0		0	0		0	0
	18	16201928	A	<*>	0	21	0	0	13	0	0	0		0	0		0	1	0	0	0		0	0		0	0
	18	16201929	T	<*>	0	21	0	0	13	0	0	0		0	0		0	1	0	0	0		0	0		0	0
	18	16201930	A	<*>	0	21	0	0	13	0	0	0		0	0		0	1	0	0	0		0	0		0	0
	18	16201931	T	<*>	0	21	0	0	13	0	0	0		0	0		0	1	0	0	0		0	0		0	0
	18	16201932	G	<*>	0	21	0	0	14	0	0	0		0	0		0	1	0	0	0		0	0		0	0
	18	16201933	C	<*>	0	20	0	0	14	0	0	0		0	0		0	1	0	0	0		0	0		0	0
	18	16201934	A	<*>	0	20	0	0	14	0	0	0		0	0		0	1	0	0	0		0	0		0	0
	18	16201935	T	<*>	0	20	0	0	14	0	0	0		0	0		0	1	0	0	0		0	0		0	0
	18	16201936	T	G	13	0	1	10	0	1	0	0		0	0		1	0	1	0	0		0	0		0	0
	18	16201936	TGAGATATAAT	GGAGATAGAAA	0	0		0	0		0	0		0	0		0	0		0	0		0	0		0	0
	18	16201973	C	<*>	0	23	0	0	19	0	0	1	0	0	0		0	1	0	0	0		0	0		0	0
	18	16201974	T	<*>	0	23	0	0	19	0	0	1	0	0	0		0	1	0	0	0		0	0		0	0
	18	16201975	T	<*>	0	23	0	0	20	0	0	1	0	0	0		0	1	0	0	0		0	0		0	0
	18	16201976	G	A	0	24	0	0	20	0	0	1	0	0	0		0	1	0	0	0		0	0		0	0
	18	16201977	C	<*>	0	24	0	0	19	0	0	1	0	0	0		0	1	0	0	0		0	0		0	0
	18	16201978	C	<*>	0	24	0	0	17	0	0	1	0	0	0		0	1	0	0	0		0	0		0	0
	18	16201979	A	<*>	0	24	0	0	17	0	0	1	0	0	0		0	1	0	0	0		0	0		0	0
	18	16201980	C	<*>	0	25	0	0	17	0	0	1	0	0	0		0	1	0	0	0		0	0		0	0
	18	16201981	T	<*>	0	25	0	0	17	0	0	1	0	0	0		0	1	0	0	0		0	0		0	0
	18	16201982	A	<*>	0	25	0	0	17	0	0	1	0	0	0		0	1	0	0	0		0	0		0	0
	18	16201983	C	T	0	24	0	0	17	0	0	1	0	0	0		0	1	0	0	0		0	0		0	0
	18	16201984	A	<*>	0	24	0	0	18	0	0	1	0	0	0		0	1	0	0	0		0	0		0	0
	18	16201985	A	<*>	0	23	0	0	18	0	0	1	0	0	0		0	1	0	0	0		0	0		0	0
	18	16201986	C	<*>	0	23	0	0	19	0	0	1	0	0	0		0	1	0	0	0		0	0		0	0
	18	16201987	A	<*>	0	23	0	0	19	0	0	1	0	0	0		0	1	0	0	0		0	0		0	0
	18	16201988	G	<*>	0	23	0	0	19	0	0	1	0	0	0		0	1	0	0	0		0	0		0	0
	18	16201989	C	<*>	0	23	0	0	19	0	0	1	0	0	0		0	1	0	0	0		0	0		0	0
	18	16201990	A	<*>	0	23	0	0	19	0	0	1	0	0	0		0	1	0	0	0		0	0		0	0
	18	16201991	A	<*>	0	23	0	0	19	0	0	1	0	0	0		0	0		0	0		0	0		0	0
	18	16201992	A	<*>	0	24	0	0	19	0	0	1	0	0	0		0	0		0	0		0	0		0	0
	18	16201993	G	<*>	0	24	0	0	20	0	0	1	0	0	0		0	0		0	0		0	0		0	0
	18	16201994	T	<*>	0	23	0	0	20	0	0	1	0	0	0		0	0		0	0		0	0		0	0
	18	16201995	A	<*>	0	23	0	0	20	0	0	1	0	0	0		0	0		0	0		0	0		0	0
	18	16201996	G	<*>	0	23	0	0	20	0	0	1	0	0	0		0	0		0	0		0	0		0	0
	18	16201997	C	<*>	0	23	0	0	21	0	0	1	0	0	0		0	0		0	0		0	0		0	0
	18	16201998	T	<*>	0	22	0	0	21	0	0	1	0	0	0		0	0		0	0		0	0		0	0
	18	16201999	T	<*>	0	22	0	0	21	0	0	1	0	0	0		0	0		0	0		0	0		0	0
	18	16202000	T	<*>	0	22	0	0	21	0	0	1	0	0	0		0	0		0	0		0	0		0	0
	18	16202001	C	<*>	0	22	0	0	21	0	0	1	0	0	0		0	0		0	0		0	0		0	0
	18	16202002	C	<*>	0	22	0	0	21	0	0	1	0	0	0		0	0		0	0		0	0		0	0
	18	16202003	A	<*>	0	22	0	0	20	0	0	1	0	0	0		0	0		0	0		0	0		0	0
	18	16202004	T	<*>	0	22	0	0	20	0	0	1	0	0	0		0	0		0	0		0	0		0	0
	18	16202005	T	<*>	0	22	0	0	20	0	0	1	0	0	0		0	0		0	0		0	0		0	0
	18	16202006	A	<*>	0	22	0	0	20	0	0	1	0	0	0		0	0		0	0		0	0		0	0
	18	16202007	A	<*>	0	22	0	0	20	0	0	1	0	0	0		0	0		0	0		0	0		0	0
	18	16202008	C	<*>	0	21	0	0	20	0	0	1	0	0	0		0	0		0	0		0	0		0	0
	18	16202009	A	<*>	0	19	0	0	20	0	0	1	0	0	0		0	0		0	0		0	0		0	0
	18	16202010	T	<*>	0	19	0	0	20	0	0	1	0	0	0		0	0		0	0		0	0		0	0
	18	16202011	A	G	0	19	0	0	20	0	0	1	0	0	0		0	0		0	0		0	0		0	0
	18	16202012	A	<*>	0	20	0	0	19	0	0	1	0	0	0		0	0		0	0		0	0		0	0
	18	16202013	G	<*>	0	19	0	0	20	0	0	1	0	0	0		0	0		0	0		0	0		0	0
	18	16202014	A	<*>	0	19	0	0	21	0	0	1	0	0	0		0	0		0	0		0	0		0	0
	18	16202015	T	<*>	0	19	0	0	21	0	0	1	0	0	0		0	0		0	0		0	0		0	0
	18	16202016	A	<*>	0	19	0	0	21	0	0	1	0	0	0		0	0		0	0		0	0		0	0
	18	16202017	A	<*>	0	19	0	0	22	0	0	1	0	0	0		0	0		0	0		0	0		0	0
	18	16202018	T	<*>	0	19	0	0	22	0	0	1	0	0	0		0	0		0	0		0	0		0	0
	18	16202019	T	<*>	0	20	0	0	23	0	0	1	0	0	0		0	0		0	0		0	0		0	0
	18	16202020	A	<*>	0	20	0	0	22	0	0	1	0	0	0		0	0		0	0		0	0		0	0
	18	16202021	T	<*>	0	20	0	0	22	0	0	1	0	0	0		0	0		0	0		0	0		0	0
	18	16202022	C	<*>	0	21	0	0	22	0	0	1	0	0	0		0	0		0	0		0	0		0	0
	18	16202023	A	<*>	0	20	0	0	22	0	0	1	0	0	0		0	0		0	0		0	0		0	0
	18	16202034	A	C	8	6	0.571429	19	0	1	0	0		0	0		0	0		0	0		0	0		0	0
	18	16202034	A	TC	0	6	0	0	0		0	0		0	0		0	0		0	0		0	0		0	0
	18	16202041	T	<*>	0	21	0	0	19	0	0	1	0	0	0		0	1	0	0	0		0	0		0	0
	18	16202042	G	<*>	0	21	0	0	18	0	0	1	0	0	0		0	1	0	0	0		0	0		0	0
	18	16202043	C	<*>	0	21	0	0	18	0	0	0		0	0		0	1	0	0	0		0	0		0	0
	18	16202044	T	<*>	0	21	0	0	18	0	0	0		0	0		0	1	0	0	0		0	0		0	0
	18	16202045	G	<*>	0	20	0	0	18	0	0	0		0	0		0	1	0	0	0		0	0		0	0
	18	16202046	G	<*>	0	20	0	0	18	0	0	0		0	0		0	1	0	0	0		0	0		0	0
	18	16202047	T	<*>	0	20	0	0	18	0	0	0		0	0		0	1	0	0	0		0	0		0	0
	18	16202048	A	<*>	0	20	0	0	18	0	0	0		0	0		0	1	0	0	0		0	0		0	0
	18	16202049	A	<*>	0	20	0	0	18	0	0	0		0	0		0	1	0	0	0		0	0		0	0
	18	16202050	A	<*>	0	20	0	0	18	0	0	0		0	0		0	1	0	0	0		0	0		0	0
	18	16202051	T	C	0	20	0	0	18	0	0	0		0	0		0	1	0	0	0		0	0		0	0
	18	16202052	T	<*>	0	20	0	0	17	0	0	0		0	0		0	1	0	0	0		0	0		0	0
	18	16202053	T	<*>	0	20	0	0	17	0	0	0		0	0		0	1	0	0	0		0	0		0	0
	18	16202054	C	<*>	0	20	0	0	16	0	0	0		0	0		0	1	0	0	0		0	0		0	0
	18	16202055	T	<*>	0	21	0	0	17	0	0	0		0	0		0	1	0	0	0		0	0		0	0
	18	16202056	C	<*>	0	20	0	0	17	0	0	0		0	0		0	1	0	0	0		0	0		0	0
	18	16202057	T	<*>	0	21	0	0	17	0	0	0		0	0		0	1	0	0	0		0	0		0	0
	18	16202058	A	<*>	0	22	0	0	17	0	0	0		0	0		0	1	0	0	0		0	0		0	0
	18	16202059	C	<*>	0	21	0	0	18	0	0	0		0	0		0	1	0	0	0		0	0		0	0
	18	16202060	A	<*>	0	20	0	0	18	0	0	0		0	0		0	1	0	0	0		0	0		0	0
	18	16202061	G	<*>	0	20	0	0	18	0	0	0		0	0		0	1	0	0	0		0	0		0	0
	18	16202062	C	<*>	0	21	0	0	18	0	0	0		0	0		0	1	0	0	0		0	0		0	0
	18	16202063	T	<*>	0	21	0	0	17	0	0	0		0	0		0	1	0	0	0		0	0		0	0
	18	16202064	T	<*>	0	21	0	0	17	0	0	0		0	0		0	1	0	0	0		0	0		0	0
	18	16202065	C	<*>	0	21	0	0	16	0	0	0		0	0		0	1	0	0	0		0	0		0	0
	18	16202066	C	<*>	0	20	0	0	16	0	0	0		0	0		0	1	0	0	0		0	0		0	0
	18	16202067	A	<*>	0	19	0	0	15	0	0	0		0	0		0	1	0	0	0		0	0		0	0
	18	16202068	C	<*>	0	19	0	0	15	0	0	0		0	0		0	1	0	0	0		0	0		0	0
	18	16202070	G	<*>	0	18	0	0	16	0	0	0		0	0		0	1	0	0	0		0	0		0	0
	18	16202071	A	<*>	0	18	0	0	15	0	0	0		0	0		0	1	0	0	0		0	0		0	0
	18	16202072	G	<*>	0	18	0	0	15	0	0	0		0	0		0	1	0	0	0		0	0		0	0
	18	16202073	A	<*>	0	19	0	0	17	0	0	0		0	0		0	1	0	0	0		0	0		0	0
	18	16202074	A	<*>	0	20	0	0	17	0	0	0		0	0		0	1	0	0	0		0	0		0	0
	18	16202075	A	<*>	0	20	0	0	17	0	0	0		0	0		0	1	0	0	0		0	0		0	0
	18	16202076	C	<*>	0	20	0	0	16	0	0	0		0	0		0	1	0	0	0		0	0		0	0
	18	16202077	A	<*>	0	20	0	0	16	0	0	0		0	0		0	1	0	0	0		0	0		0	0
	18	16202078	A	<*>	0	20	0	0	16	0	0	0		0	0		0	1	0	0	0		0	0		0	0
	18	16202079	T	C	0	20	0	0	16	0	0	0		0	0		0	1	0	0	0		0	0		0	0
	18	16202080	A	<*>	0	20	0	0	16	0	0	0		0	0		0	1	0	0	0		0	0		0	0
	18	16202081	A	<*>	0	20	0	0	16	0	0	0		0	0		0	1	0	0	0		0	0		0	0
	18	16202082	A	<*>	0	21	0	0	15	0	0	0		0	0		0	1	0	0	0		0	0		0	0
	18	16202083	A	<*>	0	21	0	0	15	0	0	0		0	0		0	1	0	0	0		0	0		0	0
	18	16202084	T	<*>	0	21	0	0	15	0	0	0		0	0		0	1	0	0	0		0	0		0	0
	18	16202085	T	<*>	0	21	0	0	15	0	0	0		0	0		0	1	0	0	0		0	0		0	0
	18	16202086	T	<*>	0	21	0	0	15	0	0	0		0	0		0	1	0	0	0		0	0		0	0
	18	16202087	T	<*>	0	20	0	0	15	0	0	0		0	0		0	1	0	0	0		0	0		0	0
	18	16202088	G	<*>	0	20	0	0	15	0	0	0		0	0		0	1	0	0	0		0	0		0	0
	18	16202089	T	C	0	20	0	0	15	0	0	0		0	0		0	1	0	0	0		0	0		0	0
	18	16202090	A	<*>	0	20	0	0	15	0	0	0		0	0		0	1	0	0	0		0	0		0	0
	18	16202091	A	<*>	0	21	0	0	15	0	0	0		0	0		0	1	0	0	0		0	0		0	0
	18	16202092	G	<*>	0	19	0	0	15	0	0	0		0	0		0	1	0	0	0		0	0		0	0
	18	16202093	T	<*>	0	19	0	0	14	0	0	0		0	0		0	1	0	0	0		0	0		0	0
	18	16202094	A	<*>	0	19	0	0	14	0	0	0		0	0		0	1	0	0	0		0	0		0	0
	18	16202095	C	<*>	0	18	0	0	14	0	0	0		0	0		0	1	0	0	0		0	0		0	0
	18	16202096	A	<*>	0	18	0	0	14	0	0	0		0	0		0	1	0	0	0		0	0		0	0
	18	16202097	G	<*>	0	18	0	0	13	0	0	0		0	0		0	1	0	0	0		0	0		0	0
	18	16202098	A	<*>	0	18	0	0	13	0	0	0		0	0		0	1	0	0	0		0	0		0	0
	18	16202099	A	<*>	0	18	0	0	13	0	0	0		0	0		0	1	0	0	0		0	0		0	0
	18	16202100	T	<*>	0	17	0	0	14	0	0	0		0	0		0	1	0	0	0		0	0		0	0
	18	16202101	T	<*>	0	17	0	0	14	0	0	0		0	0		0	1	0	0	0		0	0		0	0
	18	16202102	G	<*>	0	17	0	0	14	0	0	0		0	0		0	1	0	0	0		0	0		0	0
	18	16202103	A	<*>	0	17	0	0	14	0	0	0		0	0		0	1	0	0	0		0	0		0	0
	18	16202104	T	<*>	0	17	0	0	14	0	0	0		0	0		0	1	0	0	0		0	0		0	0
	18	16202105	A	<*>	0	17	0	0	15	0	0	0		0	0		0	1	0	0	0		0	0		0	0
	18	16202106	A	<*>	0	17	0	0	15	0	0	0		0	0		0	1	0	0	0		0	0		0	0
	18	16202107	A	<*>	0	16	0	0	15	0	0	0		0	0		0	1	0	0	0		0	0		0	0
	18	16202108	G	<*>	0	16	0	0	15	0	0	0		0	0		0	1	0	0	0		0	0		0	0
	18	16202109	G	<*>	0	16	0	0	14	0	0	0		0	0		0	1	0	0	0		0	0		0	0
	18	16202110	A	<*>	0	16	0	0	14	0	0	0		0	0		0	1	0	0	0		0	0		0	0
	18	16202111	A	<*>	0	17	0	0	14	0	0	0		0	0		0	1	0	0	0		0	0		0	0
	18	16202112	G	<*>	0	16	0	0	15	0	0	0		0	0		0	1	0	0	0		0	0		0	0
	18	16202113	G	<*>	0	16	0	0	15	0	0	0		0	0		0	1	0	0	0		0	0		0	0
	18	16202114	G	<*>	0	16	0	0	15	0	0	0		0	0		0	1	0	0	0		0	0		0	0
	18	16202115	G	<*>	0	16	0	0	15	0	0	0		0	0		0	1	0	0	0		0	0		0	1	0
	18	16202116	C	<*>	0	16	0	0	15	0	0	0		0	0		0	1	0	0	0		0	0		0	1	0
	18	16202117	T	<*>	0	16	0	0	15	0	0	0		0	0		0	1	0	0	0		0	0		0	1	0
	18	16202118	C	<*>	0	16	0	0	14	0	0	0		0	0		0	1	0	0	0		0	0		0	1	0
	18	16202119	A	<*>	0	16	0	0	14	0	0	0		0	0		0	1	0	0	0		0	0		0	1	0
	18	16202120	A	<*>	0	16	0	0	14	0	0	0		0	0		0	1	0	0	0		0	0		0	1	0
	18	16202121	C	<*>	0	16	0	0	14	0	0	0		0	0		0	1	0	0	0		0	0		0	1	0
	18	16202122	T	<*>	0	16	0	0	14	0	0	0		0	0		0	1	0	0	0		0	0		0	1	0
	18	16202123	T	<*>	0	16	0	0	14	0	0	0		0	0		0	1	0	0	0		0	0		0	1	0
	18	16202124	T	<*>	0	16	0	0	14	0	0	0		0	0		0	1	0	0	0		0	0		0	1	0
	18	16202125	G	<*>	0	16	0	0	14	0	0	0		0	0		0	0		0	0		0	0		0	1	0
	18	16202126	C	<*>	0	16	0	0	14	0	0	0		0	0		0	0		0	0		0	0		0	1	0
	18	16202127	C	<*>	0	16	0	0	14	0	0	0		0	0		0	0		0	0		0	0		0	1	0
	18	16202128	A	<*>	0	17	0	0	14	0	0	0		0	0		0	0		0	0		0	0		0	1	0
	18	16202129	G	<*>	0	17	0	0	14	0	0	1	0	0	0		0	0		0	0		0	0		0	1	0
	18	16202130	C	<*>	0	17	0	0	14	0	0	1	0	0	0		0	0		0	0		0	0		0	1	0
	18	16202131	T	<*>	0	17	0	0	14	0	0	1	0	0	0		0	0		0	0		0	0		0	1	0
	18	16202132	A	<*>	0	17	0	0	14	0	0	1	0	0	0		0	0		0	0		0	0		0	1	0
	18	16202133	A	<*>	0	18	0	0	14	0	0	1	0	0	0		0	0		0	0		0	0		0	1	0
	18	16202134	A	<*>	0	19	0	0	14	0	0	1	0	0	0		0	0		0	0		0	0		0	1	0
	18	16202135	T	<*>	0	19	0	0	14	0	0	1	0	0	0		0	0		0	0		0	0		0	1	0
	18	16202136	T	<*>	0	19	0	0	13	0	0	1	0	0	0		0	0		0	0		0	0		0	1	0
	18	16202137	G	<*>	0	19	0	0	13	0	0	1	0	0	0		0	0		0	0		0	0		0	1	0
	18	16202138	T	<*>	0	18	0	0	12	0	0	1	0	0	0		0	0		0	0		0	0		0	1	0
	18	16202139	T	<*>	0	19	0	0	13	0	0	1	0	0	0		0	0		0	0		0	0		0	1	0
	18	16202140	T	<*>	0	19	0	0	13	0	0	1	0	0	0		0	0		0	0		0	0		0	1	0
	18	16202141	G	<*>	0	20	0	0	13	0	0	1	0	0	0		0	0		0	0		0	0		0	1	0
	18	16202142	A	<*>	0	21	0	0	13	0	0	1	0	0	0		0	0		0	0		0	0		0	1	0
	18	16202143	A	<*>	0	21	0	0	12	0	0	1	0	0	0		0	0		0	0		0	0		0	1	0
	18	16202144	C	<*>	0	21	0	0	12	0	0	1	0	0	0		0	0		0	0		0	0		0	1	0
	18	16202145	C	<*>	0	22	0	0	12	0	0	1	0	0	0		0	0		0	0		0	0		0	1	0
	18	16202146	A	<*>	0	22	0	0	12	0	0	1	0	0	0		0	0		0	0		0	0		0	1	0
	18	16202147	T	<*>	0	23	0	0	12	0	0	1	0	0	0		0	0		0	0		0	0		0	1	0
	18	16202148	T	<*>	0	23	0	0	12	0	0	1	0	0	0		0	0		0	0		0	0		0	1	0
	18	16202149	T	<*>	0	22	0	0	12	0	0	1	0	0	0		0	0		0	0		0	0		0	1	0
	18	16202150	C	<*>	0	22	0	0	12	0	0	1	0	0	0		0	0		0	0		0	0		0	1	0
	18	16202151	A	<*>	0	22	0	0	12	0	0	1	0	0	1	0	0	0		0	0		0	0		0	1	0
	18	16202152	A	<*>	0	23	0	0	12	0	0	1	0	0	1	0	0	0		0	0		0	0		0	1	0
	18	16202153	A	<*>	0	23	0	0	12	0	0	1	0	0	1	0	0	0		0	0		0	0		0	1	0
	18	16202154	A	<*>	0	23	0	0	12	0	0	1	0	0	1	0	0	0		0	0		0	0		0	1	0
	18	16202155	T	<*>	0	23	0	0	12	0	0	1	0	0	1	0	0	0		0	0		0	0		0	1	0
	18	16202156	G	<*>	0	23	0	0	12	0	0	1	0	0	1	0	0	0		0	0		0	0		0	1	0
[truncated: 104,326 more rows]
