# Supplementary material for: Genome and Transcriptome Sequencing of Populus × sibirica Identified Sex-Associated Allele-Specific Expression of the CLC Gene
Source: Front Genet. 2021 Aug 11;12:676935. doi: 10.3389/fgene.2021.676935 (PMC8385651; doi:10.3389/fgene.2021.676935)
Supplement: Supplementary Data 5 — The selected polymorphisms in the TCP, CLC, and MET1 genes for the female Populus × sibirica plant based on genome and transcriptome sequencing data. [file Data_Sheet_5.XLSX]

## Sheet: TCP female
Supplementary Data 5. The selected polymorphisms in the TCP, CLC, and MET1 genes for the female Populus x sibirica plant based on genome and transcriptome sequencing data.
Data are presented for genomic sites, in which two variants of nucleotides were identified based on genome sequencing data with at least 2x coverage in at least one tissue based on transcriptome sequencing data.
					Genome sequencing data			Transcriptome sequencing data for catkin axes			Transcriptome sequencing data for flowers			Transcriptome sequencing data for leaves
Gene	Chromosome	Nucleotide position	Reference allele	Alternative allele	Alternative allele coverage	Reference allele coverage	Alternative allele frequency	Alternative allele coverage	Reference allele coverage	Alternative allele frequency	Alternative allele coverage	Reference allele coverage	Alternative allele frequency	Alternative allele coverage	Reference allele coverage	Alternative allele frequency
TCP	18	16275734	T	A	1	6	0.142857	0	0		0	1	0	0	5	0
TCP	18	16275735	T	A	6	1	0.857143	0	0		1	0	1	5	0	1
TCP	18	16275803	A	T	9	9	0.5	0	1	0	0	2	0	0	7	0
TCP	18	16275809	T	G	10	10	0.5	0	1	0	0	2	0	0	7	0
TCP	18	16275867	T	C	7	11	0.388889	19	23	0.452381	6	8	0.428571	44	53	0.453608
TCP	18	16275894	T	C	6	12	0.333333	25	41	0.378788	4	9	0.307692	41	61	0.401961
TCP	18	16276032	T	A	14	5	0.736842	14	23	0.378378	8	7	0.533333	46	43	0.516854
TCP	18	16276063	C	A	8	15	0.347826	24	27	0.470588	14	9	0.608696	49	44	0.526882
TCP	18	16277205	G	A	19	1	0.95	2	0	1	2	0	1	8	0	1
TCP	18	16277493	T	C	10	7	0.588235	2	5	0.285714	0	5	0	0	4	0
TCP	18	16277550	G	A	7	9	0.4375	4	2	0.666667	2	8	0.2	1	1	0.5
TCP	18	16278012	C	T	12	10	0.545455	6	3	0.666667	3	3	0.5	3	4	0.428571
TCP	18	16279141	G	A	13	20	0.393939	3	2	0.6	4	3	0.571429	1	2	0.333333
TCP	18	16279279	G	A	14	10	0.583333	1	0	1	1	0	1	0	0
TCP	18	16279348	A	G	9	9	0.5	6	7	0.461538	8	1	0.888889	1	2	0.333333
TCP	18	16279393	G	T	9	13	0.409091	6	5	0.545455	0	4	0	0	1	0
TCP	18	16279665	T	TATAA	6	10	0.375	0	0		2	3	0.4	0	4	0
TCP	18	16279747	CT	C	8	14	0.363636	2	2	0.5	0	2	0	0	0

## Sheet: CLC female
Supplementary Data 5. The selected polymorphisms in the TCP, CLC, and MET1 genes for the female Populus x sibirica plant based on genome and transcriptome sequencing data.
Data are presented for genomic sites, in which two variants of nucleotides were identified based on genome sequencing data with at least 2x coverage in at least one tissue based on transcriptome sequencing data.
					Genome sequencing data			Transcriptome sequencing data for catkin axes			Transcriptome sequencing data for flowers			Transcriptome sequencing data for leaves
Gene	Chromosome	Nucleotide position	Reference allele	Alternative allele	Alternative allele coverage	Reference allele coverage	Alternative allele frequency	Alternative allele coverage	Reference allele coverage	Alternative allele frequency	Alternative allele coverage	Reference allele coverage	Alternative allele frequency	Alternative allele coverage	Reference allele coverage	Alternative allele frequency
CLC	18	16268232	A	G	20	10	0.666667	12	6	0.666667	15	4	0.789474	10	2	0.833333
CLC	18	16268334	GTAATG	CT	7	13	0.35	4	5	0.444444	4	6	0.4	7	8	0.466667
CLC	18	16268380	A	G	10	13	0.434783	4	4	0.5	5	6	0.454545	6	4	0.6
CLC	18	16268390	A	C	12	10	0.545455	3	5	0.375	9	8	0.529412	3	7	0.3
CLC	18	16268622	T	C	8	9	0.470588	0	0		0	4	0	0	0
CLC	18	16268653	C	A	13	14	0.481481	0	0		0	2	0	0	0
CLC	18	16268787	C	A	20	12	0.625	7	5	0.583333	20	13	0.606061	13	1	0.928571
CLC	18	16269203	T	C	10	14	0.416667	5	0	1	10	5	0.666667	0	0
CLC	18	16269241	A	T	8	13	0.380952	3	0	1	8	3	0.727273	0	0
CLC	18	16269277	A	G	5	12	0.294118	2	0	1	9	1	0.9	0	0
CLC	18	16269475	A	T	6	6	0.5	0	1	0	5	7	0.416667	0	1	0
CLC	18	16269544	A	G	6	9	0.4	1	0	1	7	8	0.466667	0	0
CLC	18	16269643	T	A	13	15	0.464286	1	2	0.333333	4	8	0.333333	0	0
CLC	18	16269670	A	G	11	12	0.478261	0	3	0	5	8	0.384615	0	0
CLC	18	16269688	A	G	8	9	0.470588	0	6	0	5	9	0.357143	0	0
CLC	18	16269721	G	A	5	8	0.384615	0	6	0	5	12	0.294118	0	0
CLC	18	16269733	T	A	6	5	0.545455	4	1	0.8	12	6	0.666667	0	0
CLC	18	16269760	C	A	10	7	0.588235	4	3	0.571429	12	8	0.6	0	0
CLC	18	16269801	A	G	12	9	0.571429	4	3	0.571429	11	6	0.647059	0	0
CLC	18	16269835	T	A	12	14	0.461538	3	3	0.5	6	11	0.352941	0	0
CLC	18	16270038	GCCA	ACCG	12	15	0.444444	1	1	0.5	3	3	0.5	0	0
CLC	18	16270050	C	T	14	16	0.466667	1	2	0.333333	4	5	0.444444	0	0
CLC	18	16270113	G	A	12	8	0.6	2	4	0.333333	7	4	0.636364	1	0	1
CLC	18	16270161	T	A	13	9	0.590909	2	2	0.5	1	7	0.125	1	0	1
CLC	18	16270170	A	G	12	9	0.571429	2	2	0.5	1	6	0.142857	1	0	1
CLC	18	16270429	A	<*>	1	17	0.0555556	0	3	0	0	12	0	0	0
CLC	18	16270455	C	T	9	12	0.428571	1	1	0.5	8	5	0.615385	0	0
CLC	18	16270497	T	C	11	15	0.423077	0	1	0	3	6	0.333333	0	0
CLC	18	16270503	A	T	13	13	0.5	0	1	0	3	6	0.333333	0	0
CLC	18	16270515	C	T	10	14	0.416667	0	1	0	2	5	0.285714	0	0
CLC	18	16270587	A	C	13	5	0.722222	0	0		4	7	0.363636	0	0
CLC	18	16270621	C	G	3	19	0.136364	0	1	0	5	4	0.555556	0	0
CLC	18	16270625	A	G	20	3	0.869565	1	0	1	4	5	0.444444	0	0
CLC	18	16270737	A	G	12	9	0.571429	0	0		0	2	0	0	0
CLC	18	16270800	G	A	11	9	0.55	0	1	0	0	2	0	0	0
CLC	18	16270865	C	A	13	7	0.65	0	1	0	0	2	0	0	0
CLC	18	16270996	TTGA	ATGG	7	7	0.5	0	0		0	2	0	0	0
CLC	18	16271159	A	T	7	11	0.388889	1	0	1	3	5	0.375	0	1	0
CLC	18	16271411	G	A	11	11	0.5	0	0		0	2	0	0	0
CLC	18	16271415	G	C	9	12	0.428571	0	0		2	0	1	0	0
CLC	18	16271616	T	A	12	13	0.48	1	2	0.333333	2	9	0.181818	0	0
CLC	18	16271673	T	C	14	17	0.451613	1	1	0.5	10	6	0.625	1	0	1
CLC	18	16272760	C	T	8	8	0.5	0	0		2	7	0.222222	0	0

## Sheet: MET female
Supplementary Data 5. The selected polymorphisms in the TCP, CLC, and MET1 genes for the female Populus x sibirica plant based on genome and transcriptome sequencing data.
Data are presented for genomic sites, in which two variants of nucleotides were identified based on genome sequencing data with at least 2x coverage in at least one tissue based on transcriptome sequencing data.
					Genome sequencing data			Transcriptome sequencing data for catkin axes			Transcriptome sequencing data for flowers			Transcriptome sequencing data for leaves
Gene	Chromosome	Nucleotide position	Reference allele	Alternative allele	Alternative allele coverage	Reference allele coverage	Alternative allele frequency	Alternative allele coverage	Reference allele coverage	Alternative allele frequency	Alternative allele coverage	Reference allele coverage	Alternative allele frequency	Alternative allele coverage	Reference allele coverage	Alternative allele frequency
MET1	18	16249799	A	C	16	12	0.571429	0	0		0	0		5	1	0.833333
MET1	18	16249819	A	T	17	11	0.607143	1	0	1	0	0		5	4	0.555556
MET1	18	16249831	A	G	12	15	0.444444	0	1	0	0	0		5	4	0.555556
MET1	18	16249859	CTTA	C	8	16	0.333333	0	1	0	0	0		11	7	0.611111
MET1	18	16250031	T	C	7	5	0.583333	2	1	0.666667	2	4	0.333333	12	25	0.324324
MET1	18	16250791	T	C	12	5	0.705882	1	0	1	0	0		2	3	0.4
MET1	18	16251240	G	A	11	17	0.392857	1	0	1	0	1	0	0	1	0
MET1	18	16251942	G	T	13	16	0.448276	0	0		1	4	0.2	0	0
MET1	18	16252219	G	T	13	13	0.5	1	0	1	0	2	0	0	1	0
MET1	18	16253616	C	G	4	8	0.333333	0	0		0	0		3	0	1
MET1	18	16253729	C	T	11	10	0.52381	1	0	1	1	2	0.333333	1	0	1
MET1	18	16253940	ATCT	A	14	9	0.608696	1	0	1	0	0		1	6	0.142857
MET1	18	16256149	C	T	10	20	0.333333	0	0		0	0		0	2	0
MET1	18	16258463	T	C	7	11	0.388889	0	0		0	0		0	2	0
