# Supplementary material for: Genome and Transcriptome Sequencing of Populus × sibirica Identified Sex-Associated Allele-Specific Expression of the CLC Gene
Source: Front Genet. 2021 Aug 11;12:676935. doi: 10.3389/fgene.2021.676935 (PMC8385651; doi:10.3389/fgene.2021.676935)
Supplement: Supplementary Data 6 — The selected polymorphisms in the TCP, CLC, and MET1 genes for the male Populus × sibirica plant based on genome and transcriptome sequencing data. [file Data_Sheet_6.XLSX]

## Sheet: TCP male
Supplementary Data 6. The selected polymorphisms in the TCP, CLC, and MET1 genes for the male Populus x sibirica plant based on genome and transcriptome sequencing data.
Data are presented for genomic sites, in which two variants of nucleotides were identified based on genome sequencing data with at least 2x coverage in at least one tissue based on transcriptome sequencing data.
					Genome sequencing data			Transcriptome sequencing data for catkin axes			Transcriptome sequencing data for flowers			Transcriptome sequencing data for leaves
Gene	Chromosome	Nucleotide position	Reference allele	Alternative allele	Alternative allele coverage	Reference allele coverage	Alternative allele frequency	Alternative allele coverage	Reference allele coverage	Alternative allele frequency	Alternative allele coverage	Reference allele coverage	Alternative allele frequency	Alternative allele coverage	Reference allele coverage	Alternative allele frequency
TCP	18	16275673	A	G	2	2	0.5	0	4	0	0	0		0	14	0
TCP	18	16275686	A	C	2	3	0.4	0	5	0	0	1	0	0	33	0
TCP	18	16275757	T	A	5	8	0.384615	0	19	0	0	3	0	0	154	0
TCP	18	16275803	A	T	5	12	0.294118	0	19	0	0	6	0	0	139	0
TCP	18	16275809	T	G	5	11	0.3125	0	20	0	0	5	0	0	138	0
TCP	18	16275817	GCATA	CCATG	3	11	0.214286	0	17	0	0	5	0	0	82	0
TCP	18	16275837	G	C	3	9	0.25	0	20	0	0	8	0	0	89	0
TCP	18	16275847	TGA	AGC	2	9	0.181818	0	18	0	0	6	0	0	81	0
TCP	18	16275856	A	C	3	8	0.272727	8	18	0.307692	2	7	0.222222	37	87	0.298387
TCP	18	16275862	T	A	3	8	0.272727	9	17	0.346154	3	7	0.3	42	88	0.323077
TCP	18	16275867	T	C	3	7	0.3	9	16	0.36	3	7	0.3	45	80	0.36
TCP	18	16275883	A	G	3	7	0.3	10	14	0.416667	3	8	0.272727	48	60	0.444444
TCP	18	16275894	T	C	3	6	0.333333	12	15	0.444444	3	9	0.25	54	63	0.461538
TCP	18	16275924	AGT	GGA	5	3	0.625	8	12	0.4	4	6	0.4	35	49	0.416667
TCP	18	16275932	G	T	6	3	0.666667	7	12	0.368421	3	7	0.3	27	49	0.355263
TCP	18	16275941	CT	C	3	6	0.333333	9	7	0.5625	5	5	0.5	30	29	0.508475
TCP	18	16275994	G	A	10	3	0.769231	7	7	0.5	9	8	0.529412	17	35	0.326923
TCP	18	16276005	G	A	10	3	0.769231	7	8	0.466667	8	10	0.444444	15	32	0.319149
TCP	18	16276146	T	A	9	8	0.529412	4	7	0.363636	5	4	0.555556	9	9	0.5
TCP	18	16276514	T	A	8	7	0.533333	4	7	0.363636	6	3	0.666667	5	15	0.25
TCP	18	16276988	G	A	8	6	0.571429	3	2	0.6	2	6	0.25	5	4	0.555556
TCP	18	16277196	A	T	6	5	0.545455	0	1	0	0	4	0	1	2	0.333333
TCP	18	16277205	G	A	8	5	0.615385	0	1	0	0	4	0	1	3	0.25
TCP	18	16277211	T	A	9	5	0.642857	0	1	0	0	5	0	1	2	0.333333
TCP	18	16277244	C	T	7	5	0.583333	0	2	0	0	5	0	0	2	0
TCP	18	16277286	G	T	5	6	0.454545	2	4	0.333333	1	8	0.111111	0	2	0
TCP	18	16277442	C	T	5	7	0.416667	2	4	0.333333	5	11	0.3125	1	1	0.5
TCP	18	16277517	A	G	6	13	0.315789	6	2	0.75	5	6	0.454545	0	1	0
TCP	18	16277556	C	A	8	9	0.470588	5	2	0.714286	6	4	0.6	1	2	0.333333
TCP	18	16277588	G	A	9	8	0.529412	3	5	0.375	6	2	0.75	2	1	0.666667
TCP	18	16277712	A	G	10	8	0.555556	2	3	0.4	1	4	0.2	3	4	0.428571
TCP	18	16277751	A	T	11	9	0.55	2	2	0.5	3	3	0.5	4	3	0.571429
TCP	18	16277822	T	G	13	8	0.619048	2	2	0.5	5	8	0.384615	18	25	0.418605
TCP	18	16277835	A	G	10	9	0.526316	2	2	0.5	7	7	0.5	19	27	0.413043
TCP	18	16277868	G	A	9	7	0.5625	2	1	0.666667	5	5	0.5	13	23	0.361111
TCP	18	16277964	CTTC	TTTT	7	10	0.411765	1	2	0.333333	4	1	0.8	1	2	0.333333
TCP	18	16278035	A	T	6	11	0.352941	2	5	0.285714	4	6	0.4	8	4	0.666667
TCP	18	16278513	C	G	9	9	0.5	2	0	1	3	4	0.428571	2	0	1
TCP	18	16279009	A	G	8	7	0.533333	1	0	1	0	6	0	0	1	0
TCP	18	16279279	G	A	9	8	0.529412	1	1	0.5	1	2	0.333333	2	1	0.666667
TCP	18	16279348	A	G	10	9	0.526316	1	3	0.25	2	4	0.333333	2	2	0.5
TCP	18	16279432	G	A	7	4	0.636364	0	0		1	2	0.333333	1	0	1
TCP	18	16279444	G	A	7	5	0.583333	0	0		1	2	0.333333	1	0	1
TCP	18	16279483	G	A	5	5	0.5	0	1	0	0	2	0	1	1	0.5
TCP	18	16279599	G	A	8	4	0.666667	1	3	0.25	1	1	0.5	0	1	0

## Sheet: CLC male
Supplementary Data 6. The selected polymorphisms in the TCP, CLC, and MET1 genes for the male Populus x sibirica plant based on genome and transcriptome sequencing data.
Data are presented for genomic sites, in which two variants of nucleotides were identified based on genome sequencing data with at least 2x coverage in at least one tissue based on transcriptome sequencing data.
					Genome sequencing data			Transcriptome sequencing data for catkin axes			Transcriptome sequencing data for flowers			Transcriptome sequencing data for leaves
Gene	Chromosome	Nucleotide position	Reference allele	Alternative allele	Alternative allele coverage	Reference allele coverage	Alternative allele frequency	Alternative allele coverage	Reference allele coverage	Alternative allele frequency	Alternative allele coverage	Reference allele coverage	Alternative allele frequency	Alternative allele coverage	Reference allele coverage	Alternative allele frequency
CLC	18	16268285	GATGC	G	6	8	0.428571	16	0	1	12	0	1	21	1	0.954545
CLC	18	16268582	T	C	9	8	0.529412	0	0		0	0		0	2	0
CLC	18	16268719	CCC	TTT	6	3	0.666667	0	11	0	0	21	0	1	2	0.333333
CLC	18	16268845	TACA	CACG	7	12	0.368421	0	9	0	0	15	0	1	6	0.142857
CLC	18	16268896	A	G	8	14	0.363636	0	14	0	0	11	0	1	2	0.333333
CLC	18	16268960	T	G	10	8	0.555556	6	0	1	6	0	1	0	0
CLC	18	16268972	T	C	9	11	0.45	0	4	0	0	5	0	0	3	0
CLC	18	16269048	T	C	14	9	0.608696	1	0	1	6	0	1	4	0	1
CLC	18	16269155	C	T	9	8	0.529412	5	0	1	9	0	1	1	0	1
CLC	18	16269530	G	C	6	6	0.5	0	5	0	0	6	0	0	1	0
CLC	18	16269544	A	G	5	8	0.384615	5	0	1	7	0	1	0	0
CLC	18	16269620	C	T	10	5	0.666667	0	3	0	0	14	0	0	0
CLC	18	16269628	A	G	10	5	0.666667	0	3	0	0	13	0	0	0
CLC	18	16269643	T	A	5	10	0.333333	3	0	1	13	0	1	0	0
CLC	18	16269670	A	G	8	7	0.533333	4	0	1	10	0	1	0	0
CLC	18	16269688	A	G	9	5	0.642857	3	0	1	7	0	1	0	0
CLC	18	16269721	G	A	7	2	0.777778	2	2	0.5	9	0	1	0	0
CLC	18	16269789	A	G	7	4	0.636364	0	9	0	0	15	0	0	0
CLC	18	16269807	C	T	8	6	0.571429	0	4	0	0	16	0	0	0
CLC	18	16269835	T	A	7	11	0.388889	1	0	1	8	0	1	0	0
CLC	18	16270050	C	T	7	12	0.368421	2	0	1	11	0	1	0	0
CLC	18	16270113	G	A	9	11	0.45	2	0	1	5	0	1	0	0
CLC	18	16270161	T	A	10	13	0.434783	0	0		9	0	1	0	0
CLC	18	16270170	A	G	11	13	0.458333	0	0		7	0	1	0	0
CLC	18	16270429	A	<*>	1	18	0.0526316	0	1	0	2	15	0.117647	0	1	0
CLC	18	16270497	T	C	5	7	0.416667	1	0	1	6	0	1	0	0
CLC	18	16270503	A	T	6	6	0.5	1	0	1	6	0	1	0	0
CLC	18	16270515	C	T	8	6	0.571429	0	0		6	0	1	0	0
CLC	18	16270587	A	C	6	6	0.5	0	0		11	0	1	0	0
CLC	18	16270625	A	G	9	4	0.692308	1	0	1	7	0	1	0	0
CLC	18	16271159	A	T	4	13	0.235294	2	0	1	10	0	1	0	0
CLC	18	16271616	T	A	12	12	0.5	0	0		3	0	1	0	0
CLC	18	16271689	G	A	15	12	0.555556	1	0	1	15	0	1	1	0	1
CLC	18	16271714	G	A	14	10	0.583333	0	0		15	0	1	1	0	1
CLC	18	16272297	G	A	9	10	0.473684	1	0	1	7	0	1	0	0
CLC	18	16272324	A	G	11	13	0.458333	2	0	1	15	0	1	1	0	1
CLC	18	16272325	T	C	13	10	0.565217	0	2	0	0	14	0	0	1	0
CLC	18	16272702	G	C	9	9	0.5	1	0	1	2	0	1	1	0	1
CLC	18	16272708	A	T	9	9	0.5	1	0	1	2	0	1	1	0	1

## Sheet: MET1 male
Supplementary Data 6. The selected polymorphisms in the TCP, CLC, and MET1 genes for the male Populus x sibirica plant based on genome and transcriptome sequencing data.
Data are presented for genomic sites, in which two variants of nucleotides were identified based on genome sequencing data with at least 2x coverage in at least one tissue based on transcriptome sequencing data.
					Genome sequencing data			Transcriptome sequencing data for catkin axes			Transcriptome sequencing data for flowers			Transcriptome sequencing data for leaves
Gene	Chromosome	Nucleotide position	Reference allele	Alternative allele	Alternative allele coverage	Reference allele coverage	Alternative allele frequency	Alternative allele coverage	Reference allele coverage	Alternative allele frequency	Alternative allele coverage	Reference allele coverage	Alternative allele frequency	Alternative allele coverage	Reference allele coverage	Alternative allele frequency
MET1	18	16249831	A	G	8	5	0.615385	0	0		0	1	0	2	3	0.4
MET1	18	16250026	CACAAT	C	7	7	0.5	0	1	0	1	3	0.25	10	12	0.454545
MET1	18	16250791	T	C	7	7	0.5	0	0		2	1	0.666667	1	3	0.25
MET1	18	16250804	T	C	8	6	0.571429	0	2	0	2	1	0.666667	1	3	0.25
MET1	18	16251240	G	A	6	10	0.375	0	0		3	1	0.75	0	0
MET1	18	16251267	G	A	8	14	0.363636	0	0		2	3	0.4	0	0
MET1	18	16251768	C	T	8	10	0.444444	1	0	1	4	0	1	0	0
MET1	18	16251778	C	T	7	10	0.411765	1	0	1	4	0	1	0	0
MET1	18	16252157	T	C	7	13	0.35	0	0		2	1	0.666667	1	5	0.166667
MET1	18	16252207	TAC	AAT	9	12	0.428571	0	0		2	1	0.666667	2	7	0.222222
MET1	18	16253094	A	T	7	6	0.538462	0	0		2	0	1	0	0
MET1	18	16253180	C	A	10	8	0.555556	0	0		2	1	0.666667	2	0	1
MET1	18	16253194	C	T	9	12	0.428571	0	0		1	1	0.5	0	2	0
MET1	18	16253216	C	G	10	8	0.555556	0	0		0	1	0	2	0	1
MET1	18	16253415	T	C	5	8	0.384615	0	0		3	1	0.75	4	0	1
MET1	18	16253498	T	C	1	17	0.0555556	0	0		0	3	0	0	10	0
MET1	18	16253521	C	G	6	10	0.375	0	0		1	1	0.5	2	5	0.285714
MET1	18	16254066	T	C	9	8	0.529412	0	0		2	1	0.666667	4	2	0.666667
MET1	18	16254267	A	T	6	7	0.461538	0	0		0	2	0	0	0
MET1	18	16254329	AC	GT	7	7	0.5	0	0		2	0	1	0	0
MET1	18	16255769	C	T	6	7	0.461538	0	0		1	2	0.333333	0	0
MET1	18	16255778	A	G	8	6	0.571429	0	0		1	2	0.333333	0	0
MET1	18	16255786	T	C	7	6	0.538462	0	0		1	2	0.333333	0	0
MET1	18	16255877	C	T	8	7	0.533333	0	0		2	2	0.5	0	0
MET1	18	16255953	G	A	2	8	0.2	0	0		1	3	0.25	0	0
MET1	18	16256187	A	T	6	2	0.75	0	0		0	0		3	0	1
MET1	18	16256298	A	G	5	4	0.555556	0	1	0	0	0		6	3	0.666667
MET1	18	16258234	G	T	10	7	0.588235	0	0		0	0		0	2	0
MET1	18	16258264	A	G	13	8	0.619048	0	0		0	0		0	2	0
MET1	18	16258279	A	C	9	16	0.36	0	0		0	0		2	0	1
MET1	18	16258405	TAGC	AAGT	1	3	0.25	0	0		0	0		0	4	0
MET1	18	16258408	C	T	8	3	0.727273	0	0		1	0	1	2	4	0.333333
