# Supplementary material for: Genome and Transcriptome Sequencing of Populus × sibirica Identified Sex-Associated Allele-Specific Expression of the CLC Gene
Source: Front Genet. 2021 Aug 11;12:676935. doi: 10.3389/fgene.2021.676935 (PMC8385651; doi:10.3389/fgene.2021.676935)
Supplement: Supplementary Data 7 — Polymorphisms in the TCP, CLC, and MET1 genes for male and female Populus × sibirica plants based on targeted sequencing data. [file Data_Sheet_7.XLSX]

## Sheet: SNP Table
Supplementary Data 7. Polymorphisms in the TCP, CLC, and MET1 genes for male and female Populus x sibirica plants based on targeted sequencing data.
						1 (male)																2 (male)																3 (male)
						RNA from leaves				RNA from catkin axes				RNA from flowers				DNA				RNA from leaves				RNA from catkin axes				RNA from flowers				DNA				RNA from leaves				RNA from catkin axes				RNA from flowers
Gene	Chromosome	Nucleotide position	Reference allele	Alternative allele		Alternative allele coverage	Reference allele coverage	Alternative allele frequency		Alternative allele coverage	Reference allele coverage	Alternative allele frequency		Alternative allele coverage	Reference allele coverage	Alternative allele frequency		Alternative allele coverage	Reference allele coverage	Alternative allele frequency		Alternative allele coverage	Reference allele coverage	Alternative allele frequency		Alternative allele coverage	Reference allele coverage	Alternative allele frequency		Alternative allele coverage	Reference allele coverage	Alternative allele frequency		Alternative allele coverage	Reference allele coverage	Alternative allele frequency		Alternative allele coverage	Reference allele coverage	Alternative allele frequency		Alternative allele coverage	Reference allele coverage	Alternative allele frequency		Alternative allele coverage	Reference allele coverage	Alternative allele frequency
MET1	18	16255877	C	T		112	100	0.528302		72	40	0.642857		0	0			611	528	0.536435		139	75	0.649533		0	0			60	1	0.983607		552	530	0.510166		0	65	0		0	8	0		0	184	0
MET1	18	16255892	G	A		1	209	0.0047619		0	115	0		0	0			0	1109	0		0	211	0		0	0			0	60	0		0	1052	0		0	64	0		0	5	0		0	183	0
MET1	18	16255934	T	A		0	198	0		0	110	0		0	0			0	1085	0		0	211	0		0	0			0	60	0		1	1033	0.000967118		0	65	0		0	7	0		0	185	0
MET1	18	16255953	G	A		99	89	0.526596		66	38	0.634615		0	0			555	462	0.545723		135	77	0.636792		0	0			58	1	0.983051		480	495	0.492308		17	45	0.274194		6	0	1		84	96	0.466667
MET1	18	16255978	A	G		175	0	1		96	0	1		0	0			933	0	1		210	0	1		0	0			54	1	0.981818		894	0	1		15	44	0.254237		7	0	1		79	94	0.456647
MET1	18	16255988	A	G		84	86	0.494118		54	36	0.6		0	0			471	425	0.52567		125	72	0.634518		0	0			52	1	0.981132		422	463	0.476836		15	45	0.25		6	0	1		76	92	0.452381
MET1	18	16256105	G	C		120	103	0.538117		75	42	0.641026		0	0			594	490	0.54797		158	87	0.644898		0	0			58	1	0.983051		554	552	0.500904		0	53	0		0	0			0	116	0
MET1	18	16256105	GTCTT	CTCTC		0	103	0		0	42	0		0	0			0	490	0		0	87	0		0	0			0	1	0		0	552	0		19	53	0.263889		7	0	1		82	116	0.414141
MET1	18	16256105	G	T		0	103	0		0	42	0		0	0			1	490	0.00203666		0	87	0		0	0			0	1	0		0	552	0		0	53	0		0	0			0	116	0
MET1	18	16256149	C	T		0	210	0		0	116	0		0	0			0	1098	0		0	212	0		0	0			0	60	0		0	1080	0		20	43	0.31746		6	0	1		82	96	0.460674
MET1	18	16256187	A	T		113	97	0.538095		75	41	0.646552		0	0			601	502	0.544878		135	78	0.633803		0	0			59	1	0.983333		529	539	0.495318		20	43	0.31746		6	0	1		84	96	0.466667
CLC	18	16268232	A	G		0	49	0		0	16	0		0	3	0		0	1002	0		0	60	0		0	3	0		0	54	0		0	1113	0		105	0	1		30	0	1		94	0	1
CLC	18	16268285	GATGC	G		50	6	0.892857		16	0	1		2	0	1		441	646	0.405704		73	10	0.879518		4	0	1		70	0	1		638	686	0.481873		126	0	1		38	0	1		105	0	1
CLC	18	16268321	TTC	T		0	82	0		0	26	0		0	5	0		0	1295	0		0	101	0		0	5	0		0	90	0		0	1577	0		0	0			0	0			0	0
CLC	18	16268324	T	C		0	82	0		0	26	0		0	5	0		0	1295	0		0	101	0		0	5	0		0	90	0		0	1577	0		163	0	1		50	0	1		144	0	1
CLC	18	16268334	GTAATG	CT		0	88	0		0	25	0		0	6	0		0	1323	0		0	105	0		0	5	0		0	89	0		0	1585	0		162	0	1		50	0	1		144	0	1
CLC	18	16268380	A	G		0	85	0		0	25	0		0	6	0		2	1347	0.00148258		0	106	0		0	6	0		0	91	0		2	1553	0.00128617		0	181	0		0	56	0		0	159	0
CLC	18	16268390	A	C		0	84	0		0	26	0		0	5	0		0	1327	0		0	109	0		0	6	0		0	89	0		0	1528	0		177	0	1		56	0	1		156	0	1
CLC	18	16268436	A	C		66	0	1		21	0	1		3	0	1		926	6	0.993562		96	0	1		5	0	1		75	1	0.986842		1101	5	0.995479		146	0	1		42	0	1		136	1	0.992701
CLC	18	16268487	A	G		0	52	0		0	15	0		0	3	0		1	821	0.00121655		0	69	0		0	3	0		0	58	0		1	921	0.0010846		0	110	0		0	33	0		0	102	0
CLC	18	16268495	G	A		49	0	1		16	0	1		3	0	1		831	0	1		67	0	1		3	0	1		56	0	1		933	0	1		105	0	1		34	0	1		97	0	1
CLC	18	16268582	T	C		0	1	0		0	0			0	0			84	74	0.531646		0	0			0	0			0	0			121	108	0.528384		0	3	0		0	0			0	0
CLC	18	16268622	T	C		0	1	0		0	0			0	0			0	182	0		0	0			0	0			0	0			0	257	0		6	0	1		0	0			0	0
CLC	18	16268653	C	A		0	1	0		0	0			0	0			0	201	0		0	0			0	0			0	0			0	264	0		6	0	1		0	0			0	0
CLC	18	16268689	G	GA		0	1	0		0	0			0	0			0	216	0		0	0			0	0			0	0			0	270	0		6	0	1		0	0			0	0
CLC	18	16268714	C	CTTAA		1	0	1		0	0			0	0			93	121	0.434579		0	0			0	0			0	0			131	136	0.490637		0	6	0		0	0			0	0
CLC	18	16268719	CCC	TTT		0	16	0		0	11	0		0	3	0		121	103	0.540179		0	16	0		0	0			0	20	0		136	138	0.49635		0	51	0		0	23	0		0	43	0
CLC	18	16269299	A	G		1	0	1		0	0			0	0			1	0	1		1	2	0.333333		1	0	1		1	0	1		0	0			0	0			1	0	1		1	1	0.5
CLC	18	16269326	A	T		672	0	1		920	0	1		51	0	1		626	1	0.998405		132	0	1		0	0			401	0	1		790	0	1		1074	0	1		414	0	1		887	0	1
CLC	18	16269394	T	G		0	613	0		0	906	0		0	44	0		0	568	0		0	133	0		0	0			0	380	0		0	730	0		0	1063	0		0	389	0		0	865	0
CLC	18	16269415	G	A		0	592	0		0	890	0		0	38	0		0	550	0		0	130	0		0	0			0	369	0		0	697	0		0	1057	0		0	374	0		0	838	0
CLC	18	16269466	G	A		0	468	0		0	796	0		0	22	0		0	432	0		0	116	0		0	0			0	312	0		0	553	0		0	957	0		0	318	0		1	752	0.00132802
CLC	18	16269475	A	T		0	403	0		0	756	0		0	19	0		0	363	0		0	111	0		0	0			0	284	0		0	497	0		873	0	1		282	1	0.996466		694	0	1
CLC	18	16269499	G	GA		0	481	0		0	300	0		0	24	0		0	326	0		0	128	0		0	0			0	310	0		0	492	0		0	625	0		0	326	0		0	761	0
CLC	18	16269530	G	C		24	437	0.0520607		28	242	0.103704		0	33	0		112	133	0.457143		0	107	0		0	0			0	283	0		216	199	0.520482		0	584	0		0	275	0		0	688	0
CLC	18	16269544	A	G		432	22	0.951542		245	25	0.907407		29	0	1		115	116	0.497835		105	0	1		0	0			265	0	1		195	198	0.496183		0	560	0		0	265	0		0	619	0
CLC	18	16269564	A	G		2	475	0.00419287		0	286	0		0	39	0		1	314	0.0031746		0	98	0		0	0			0	258	0		0	463	0		0	533	0		0	267	0		0	594	0
CLC	18	16269584	C	A		0	568	0		0	336	0		0	48	0		0	428	0		0	104	0		0	0			0	321	0		0	623	0		0	586	0		0	333	0		0	662	0
CLC	18	16269591	C	CT		0	586	0		0	348	0		0	50	0		0	454	0		0	115	0		0	0			0	327	0		0	653	0		0	601	0		0	351	0		0	678	0
CLC	18	16269598	A	T		0	586	0		0	348	0		0	50	0		0	454	0		0	115	0		0	0			0	327	0		0	653	0		0	601	0		0	351	0		0	678	0
CLC	18	16269620	C	T		33	584	0.0534846		44	322	0.120219		0	50	0		258	259	0.499033		0	122	0		0	0			0	352	0		331	360	0.479016		0	628	0		0	373	0		0	750	0
CLC	18	16269628	A	G		32	605	0.0502355		46	331	0.122016		0	51	0		281	273	0.50722		0	131	0		0	0			0	365	0		342	379	0.474341		0	655	0		0	387	0		0	794	0
CLC	18	16269643	T	A		612	30	0.953271		330	47	0.875332		51	0	1		266	293	0.47585		127	0	1		0	0			375	0	1		384	353	0.521031		0	665	0		1	385	0.00259067		0	809	0
CLC	18	16269670	A	G		639	34	0.94948		345	49	0.875635		53	0	1		292	312	0.483444		135	0	1		0	0			391	0	1		418	360	0.537275		0	683	0		0	407	0		0	854	0
CLC	18	16269688	A	G		642	34	0.949704		345	50	0.873418		53	0	1		294	331	0.4704		135	0	1		0	0			392	0	1		415	368	0.530013		0	703	0		0	413	0		1	866	0.0011534
CLC	18	16269721	G	A		651	30	0.955947		347	50	0.874055		53	0	1		301	331	0.476266		135	0	1		0	0			404	1	0.997531		428	372	0.535		1	709	0.00140845		0	415	0		0	876	0
CLC	18	16269733	T	A		0	683	0		0	843	0		0	53	0		1	630	0.00158479		0	136	0		0	0			0	404	0		0	800	0		724	0	1		420	0	1		889	0	1
CLC	18	16269754	G	A		0	678	0		0	850	0		0	53	0		0	633	0		0	135	0		0	0			0	404	0		0	790	0		195	848	0.186961		0	427	0		0	891	0
CLC	18	16269760	C	A		1	686	0.0014556		0	854	0		0	53	0		0	629	0		0	136	0		0	0			0	400	0		0	800	0		1061	0	1		428	0	1		902	1	0.998893
CLC	18	16270012	A	G		0	0			0	0			0	0			0	1	0		1	1	0.5		0	2	0		1	0	1		0	0			0	0			0	0			0	0
CLC	18	16270038	G	A		0	0			1	0	1		0	0			0	2	0		1	0	1		0	4	0		0	4	0		0	0			0	744	0		0	387	0		0	1204	0
CLC	18	16270038	GCCA	ACCG		771	0	1		616	0	1		36	0	1		191	2	0.989637		426	0	1		470	4	0.991561		1474	4	0.997294		213	0	1		0	744	0		0	387	0		0	1204	0
CLC	18	16270038	G	C		61	0	1		24	0	1		0	0			197	2	0.98995		84	0	1		0	4	0		0	4	0		142	0	1		0	744	0		0	387	0		0	1204	0
CLC	18	16270050	C	T		760	60	0.926829		610	23	0.963665		34	0	1		194	188	0.507853		426	84	0.835294		473	0	1		1462	0	1		212	135	0.610951		0	724	0		0	376	0		0	1180	0
CLC	18	16270113	G	A		852	76	0.918103		697	29	0.960055		42	0	1		166	183	0.475645		491	98	0.833616		578	0	1		1681	0	1		187	119	0.611111		0	882	0		0	398	0		0	1327	0
CLC	18	16270161	T	A		1081	89	0.923932		882	35	0.961832		49	0	1		140	127	0.524345		644	129	0.833118		738	0	1		2203	0	1		139	88	0.612335		0	1138	0		0	495	0		1	1690	0.000591366
CLC	18	16270170	A	G		1033	92	0.918222		857	39	0.956473		45	0	1		123	130	0.486166		640	135	0.825806		739	0	1		2167	0	1		129	91	0.586364		1	1171	0.000853242		0	541	0		0	1776	0
CLC	18	16270209	C	T		5	0	1		0	0			0	0			74	80	0.480519		3	1	0.75		0	0			0	0			84	68	0.552632		0	3	0		0	1	0		0	0
CLC	18	16270220	G	GA		0	0			0	0			0	0			43	56	0.434343		2	1	0.666667		0	0			0	0			38	60	0.387755		0	2	0		0	0			0	0
CLC	18	16270230	G	T		1	0	1		0	0			0	0			45	38	0.542169		2	0	1		0	0			0	0			47	43	0.522222		0	2	0		0	0			0	0
CLC	18	16270238	C	T		1	0	1		0	0			0	0			32	32	0.5		2	1	0.666667		0	0			0	0			33	38	0.464789		0	2	0		0	0			0	0
CLC	18	16270276	CTC	AGA		1	0	1		0	0			0	0			17	14	0.548387		1	1	0.5		0	0			0	0			24	18	0.571429		0	0			0	0			0	0
CLC	18	16270277	T	G		0	0			0	0			0	0			0	14	0		0	1	0		0	0			0	0			0	18	0		1	0	1		0	0			0	0
CLC	18	16270308	G	A		2	0	1		0	0			0	0			43	48	0.472527		2	1	0.666667		0	0			0	0			63	55	0.533898		0	3	0		0	1	0		0	0
CLC	18	16270317	G	A		2	0	1		0	0			0	0			55	63	0.466102		2	1	0.666667		0	0			0	0			75	74	0.503356		0	3	0		0	1	0		0	0
CLC	18	16270324	T	A		2	0	1		0	0			0	0			129	0	1		3	0	1		0	0			0	0			152	0	1		3	0	1		1	0	1		0	0
CLC	18	16270334	T	A		2	0	1		0	0			0	0			81	81	0.5		2	1	0.666667		0	0			0	0			87	88	0.497143		0	4	0		0	1	0		0	0
CLC	18	16270334	TAGA	AAGT		0	0			0	0			0	0			0	81	0		0	1	0		0	0			0	0			0	88	0		0	4	0		0	1	0		0	0
CLC	18	16270341	C	T		2	0	1		0	0			0	0			82	89	0.479532		2	1	0.666667		0	0			0	0			95	97	0.494792		0	4	0		0	1	0		0	0
CLC	18	16270455	C	T		0	812	0		1	622	0.00160514		0	37	0		0	364	0		0	503	0		0	481	0		1	1427	0.00070028		0	346	0		729	6	0.991837		370	0	1		1166	3	0.997434
CLC	18	16270487	A	G		0	832	0		0	636	0		0	37	0		0	387	0		0	506	0		0	472	0		0	1454	0		0	362	0		0	731	0		1	377	0.0026455		0	1186	0
CLC	18	16270497	T	C		773	61	0.926859		612	22	0.9653		37	0	1		205	185	0.525641		419	84	0.833002		471	0	1		1457	0	1		187	174	0.518006		0	731	0		0	379	0		0	1185	0
CLC	18	16270503	A	T		774	61	0.926946		613	22	0.965354		37	0	1		205	189	0.520305		420	85	0.831683		474	0	1		1454	0	1		190	173	0.523416		0	738	0		0	385	0		1	1189	0.000840336
CLC	18	16270515	C	T		777	59	0.929426		619	22	0.965679		36	0	1		207	187	0.525381		422	85	0.832347		474	0	1		1469	0	1		189	175	0.519231		1	740	0.00134953		0	383	0		0	1198	0
TCP	18	16275898	A	G		0	0			0	0			0	0			2	0	1		0	0			0	0			0	0			0	0			2	0	1		1	0	1		0	0
TCP	18	16275898	A	T		0	0			0	0			0	0			0	0			0	0			0	0			0	0			2	0	1		0	0			0	0			0	0
TCP	18	16275924	AGT	GGA		577	343	0.627174		161	107	0.600746		23	0	1		909	1018	0.471718		1455	638	0.695174		45	15	0.75		34	0	1		1272	1304	0.493789		1619	536	0.751276		85	40	0.68		352	42	0.893401
TCP	18	16275932	G	T		629	357	0.637931		170	108	0.611511		24	0	1		972	1063	0.477641		1557	657	0.703252		46	18	0.71875		37	0	1		1362	1366	0.499267		1712	562	0.752858		93	40	0.699248		387	43	0.9
TCP	18	16275941	CT	C		352	659	0.34817		116	178	0.394558		0	24	0		1084	1036	0.511321		669	1605	0.294195		18	49	0.268657		0	38	0		1394	1425	0.494502		0	2356	0		0	145	0		0	445	0
TCP	18	16275953	GTCAGATTC	G		0	1023	0		0	298	0		0	23	0		0	2203	0		0	2323	0		0	67	0		0	37	0		0	2897	0		0	2405	0		0	151	0		0	452	0
TCP	18	16275994	G	A		675	380	0.63981		188	125	0.600639		22	0	1		1139	1264	0.473991		1679	721	0.699583		48	19	0.716418		41	0	1		1530	1521	0.501475		1888	619	0.753091		111	47	0.702532		428	48	0.89916
TCP	18	16276005	G	A		688	385	0.641193		189	127	0.598101		22	0	1		1153	1309	0.468318		1704	734	0.698934		49	20	0.710145		42	0	1		1536	1552	0.497409		1921	629	0.753333		109	51	0.68125		432	50	0.896266
TCP	18	16276032	T	A		0	1063	0		0	308	0		0	23	0		0	2445	0		6	2447	0.00244598		0	67	0		0	42	0		0	3049	0		1928	635	0.752243		109	50	0.685535		437	50	0.897331
TCP	18	16276063	C	A		0	1044	0		0	298	0		0	22	0		3	2449	0.00122349		0	2452	0		0	67	0		0	42	0		0	3079	0		0	2586	0		0	159	0		0	497	0
TCP	18	16276146	T	A		443	238	0.650514		123	80	0.605911		14	0	1		738	811	0.476436		1304	560	0.699571		41	15	0.732143		29	0	1		986	982	0.501016		0	1840	0		0	110	0		0	349	0
TCP	18	16276180	T	C		0	0			0	0			0	0			1	0	1		1	0	1		0	0			0	0			0	0			0	0			0	0			0	0
TCP	18	16277550	G	A		5	263	0.0186567		2	107	0.0183486		0	4	0		15	265	0.0535714		1	57	0.0172414		0	5	0		0	80	0		13	325	0.0384615		98	101	0.492462		26	14	0.65		114	53	0.682635
TCP	18	16277556	C	A		158	117	0.574545		69	44	0.610619		0	5	0		132	142	0.481752		38	19	0.666667		5	0	1		85	0	1		179	155	0.535928		98	102	0.49		26	14	0.65		113	53	0.680723
TCP	18	16277588	G	A		131	116	0.530364		65	38	0.631068		0	4	0		136	123	0.525097		36	20	0.642857		5	0	1		78	0	1		180	148	0.54878		95	97	0.494792		24	13	0.648649		109	53	0.67284
TCP	18	16277712	A	G		53	58	0.477477		29	22	0.568627		0	2	0		47	50	0.484536		28	13	0.682927		4	0	1		54	0	1		85	70	0.548387		55	68	0.447154		10	8	0.555556		70	27	0.721649
TCP	18	16277751	A	T		29	26	0.527273		20	12	0.625		0	0			25	22	0.531915		22	10	0.6875		3	0	1		33	0	1		41	33	0.554054		47	52	0.474747		7	6	0.538462		44	16	0.733333
TCP	18	16277822	T	G		100	85	0.540541		48	33	0.592593		0	2	0		68	63	0.519084		23	8	0.741935		5	0	1		53	0	1		97	91	0.515957		60	61	0.495868		9	7	0.5625		62	22	0.738095
TCP	18	16277835	A	G		119	106	0.528889		57	38	0.6		0	4	0		83	89	0.482558		27	13	0.675		5	0	1		63	0	1		127	120	0.51417		78	76	0.506494		14	8	0.636364		75	31	0.707547
TCP	18	16277868	G	A		141	123	0.534091		61	45	0.575472		0	4	0		109	126	0.46383		33	16	0.673469		5	0	1		75	0	1		154	162	0.487342		87	89	0.494318		21	13	0.617647		100	40	0.714286
TCP	18	16277895	A	G		259	0	1		107	0	1		4	0	1		237	2	0.991632		52	0	1		5	0	1		78	0	1		299	0	1		186	0	1		34	0	1		141	0	1
TCP	18	16277964	CTTC	TTTT		155	125	0.553571		71	45	0.612069		0	5	0		141	151	0.482877		37	19	0.660714		5	0	1		80	0	1		180	181	0.498615		144	95	0.60251		24	14	0.631579		114	51	0.690909
TCP	18	16278003	C	A		0	282	0		0	117	0		0	5	0		0	301	0		0	58	0		0	5	0		0	81	0		0	364	0		0	245	0		0	40	0		0	169	0
TCP	18	16278012	C	T		2	279	0.00711744		0	116	0		0	5	0		9	296	0.0295082		0	59	0		0	5	0		0	83	0		19	347	0.0519126		149	95	0.610656		23	14	0.621622		116	53	0.686391
TCP	18	16278035	A	T		156	119	0.567273		70	47	0.598291		0	5	0		144	156	0.48		37	20	0.649123		5	0	1		83	0	1		182	169	0.518519		150	95	0.612245		25	15	0.625		113	53	0.680723
[truncated: 207 more columns]
